# Supplementary material for: Evaluation of integrin αvβ6 cystine knot PET tracers to detect cancer and idiopathic pulmonary fibrosis
Source: Springer Nature journal article supplement (doi:10.1038/s41467-019-11863-w), 2019-10-14

## Final Study Report

*14-Day Single Intravenous Dose Toxicity Study of  
[<sup>19</sup>F]FP-R<sub>0</sub>1-MG-F2 in Sprague Dawley Rats*

Test Article

[<sup>19</sup>F]FP-R<sub>0</sub>1-MG-F2

Authors

Adrienne Edgell, B.S., CMAR, LATG  
Grace McMonagle, B.S.

Study Completion Date

February 24, 2015

Performing Laboratory

SoBran Rangos Animal Facility  
855 N. Wolfe Street, Suite 622  
Baltimore, MD 21205

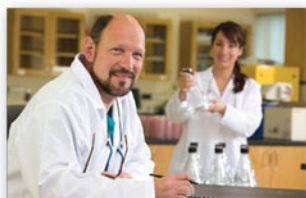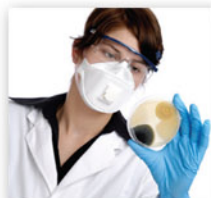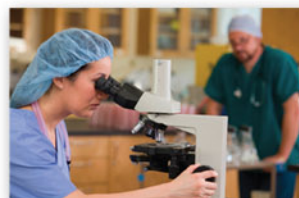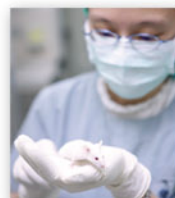

SoBran Study Number

SB-SU-003

Client

Stanford University  
1201 Welch Road, Rm PS049  
Stanford, CA 94305-5484

Sponsor

Frederick T. Chin, Ph.D.

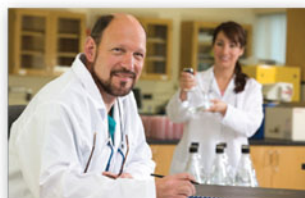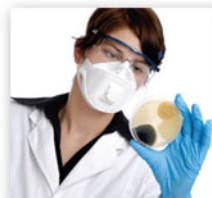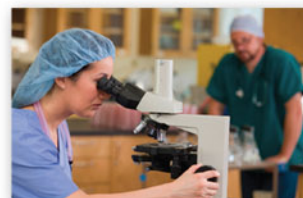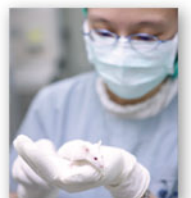

## COMPLIANCE STATEMENT

14-Day Single Intravenous Dose Toxicity Study of [<sup>19</sup>F]FP-R<sub>0</sub>1-MG-F2 in Sprague Dawley Rats

The study was conducted in compliance with Food and Drug Administration Good Laboratory Practices as found in title 21 Code of Federal Regulations part 58 with the following exceptions:

Dose formulation analysis for concentration and stability was not conducted for the test article formulation. Manufacturing of the vehicle components, ethanol and sterile saline (0.9% sodium chloride), were conducted in accordance with cGMP regulations and characterization conducted in accordance with USP regulations.

All statistical analyses were performed with non-validated software (statistical package R version 3.1.2 (for ANOVA using the aov function) and the multcomp package for Dunnett's t-tests). The statistical analysis report was audited against the study data by SoBran's QAU.

There were no deviations from the aforementioned regulations that affected the quality or integrity of the study or the interpretations of the results in this report.

Signature:

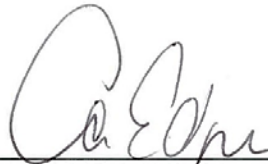

Adrienne Edgell, BS, CMAR, LATG  
Study Director

2/24/15  
Date

## QUALITY ASSURANCE STATEMENT

### 14-Day Single Intravenous Dose Toxicity Study of [<sup>19</sup>F]FP-R<sub>0</sub>1-MG-F2 in Sprague Dawley Rats

The SoBran Rangos Animal Facility is reviewed by SoBran's Quality Assurance Unit (QAU) on a monthly basis for quality assurance/quality control compliance. Individual studies are monitored according to the designated Good Laboratory Practices (GLP) status as found in title 21 Code of Federal Regulations part 58, the protocol, and SoBran's Standard Operating Procedures. All findings were reported to the Study Director and Study Management as indicated below.

| Study Phase Audited                                 | Date(s) Audited | Date Reported to Study Management | Date Reported to Study Director |
|-----------------------------------------------------|-----------------|-----------------------------------|---------------------------------|
| Day 1 Test Article Formulation; Dose Administration | 10/7/2014       | 10/15/2014                        | 10/15/2014                      |
| Day 15 Blood Collection, Necropsy and Organ Weights | 10/21/2014      | 10/23/2014                        | 10/23/2014                      |
| Draft report Audit and Data Review                  | 10/8/2014       | 10/9/2014                         | 10/9/2014                       |
| Statistics Report Audit                             | 10/8/2014       | 10/9/2014                         | 10/9/2014                       |
| Final Report Post Audit                             | 2/20/2015       | 2/20/2015                         | 2/20/2015                       |

All audit findings were addressed appropriately. This final report accurately describes the study methods and procedures used during the conduct of the study and the results were reported accurately in the raw data.

Signature:



 \_\_\_\_\_  
 Patricia Asah  
 SoBran Quality Assurance

2/24/15

 \_\_\_\_\_  
 Date

## SIGNATURE PAGE

14-Day Single Intravenous Dose Toxicity Study of [<sup>19</sup>F]FP-R<sub>0</sub>1-MG-F2 in Sprague Dawley Rats

|            |                                                                                             |                        |
|------------|---------------------------------------------------------------------------------------------|------------------------|
| Signature: | 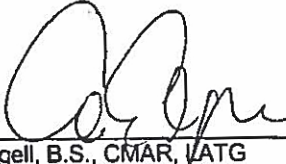<br>_____  | <u>2/24/15</u><br>Date |
|            | Adrienne Edgell, B.S., CMAR, IATG<br>Study Director                                         |                        |
| Signature: | <br>_____  | <u>2/24/15</u><br>Date |
|            | Gregory Kelly, Ph.D.<br>Study Management                                                    |                        |
| Signature: | <br>_____ | <u>2/24/15</u><br>Date |
|            | Grace McMonagle, B.S.<br>Technical Writer                                                   |                        |

## Abbreviations

|                  |                               |
|------------------|-------------------------------|
| >                | greater than                  |
| <                | less than                     |
| ≥                | greater than or equal to      |
| ≤                | less than or equal to         |
| ↑                | increase                      |
| ↓                | decrease                      |
| ♀                | female                        |
| ♂                | male                          |
| °                | degree                        |
| %                | percent                       |
| <b>BW or BWT</b> | bodyweight                    |
| <b>BWG</b>       | Bodyweight gain               |
| <b>C</b>         | Celsius                       |
| <b>F</b>         | Fahrenheit                    |
| <b>F or f</b>    | female                        |
| <b>g</b>         | gram                          |
| <b>hr or HR</b>  | hour                          |
| <b>kg</b>        | kilogram                      |
| <b>L</b>         | liter                         |
| <b>M or m</b>    | Male                          |
| <b>mg</b>        | milligram                     |
| <b>min</b>       | minute                        |
| <b>mL</b>        | milliliter                    |
| <b>N</b>         | Number or sample size         |
| <b>NA or N/A</b> | not applicable                |
| <b>No. or #</b>  | number                        |
| <b>rcf</b>       | relative centrifugal field    |
| <b>rpm</b>       | revolutions per minute        |
| <b>S.D.</b>      | standard deviation            |
| <b>SD</b>        | study day/ standard deviation |
| <b>sec</b>       | second                        |
| <b>ug or µg</b>  | microgram                     |
| <b>U</b>         | units                         |
| <b>wk</b>        | week                          |
| <b>FDA</b>       | Food and Drug Administration  |
| <b>GLP</b>       | Good Laboratory Practices     |
| <b>QA</b>        | Quality Assurance             |
| <b>QAU</b>       | Quality Assurance Unit        |
| <b>SOP</b>       | Standard Operating Procedures |

## STUDY INFORMATION PAGE

Test Article: [<sup>19</sup>F]FP-R<sub>0</sub>1-MG-F2

Study Initiation Date: September 26, 2014

Initiation of Dosing: October 7, 2014

In-life Completion Date: October 21, 2014

Laboratory Completion Date: February 24, 2015

  

Client: Stanford University  
1201 Welch Road, Rm PS049  
Stanford, CA 94305-5484

  

Sponsor: Frederick T. Chin, Ph.D.

  

Testing Facility: SoBran Rangos Animal Facility  
855 N. Wolfe Street, Suite 622  
Baltimore, MD 21205

  

SoBran Management: Greg Kelly, Ph.D.

  

Study Director: Adrienne Edgell, BS, CMAR, LATG

## TABLE OF CONTENTS

|                                                                                           |          |
|-------------------------------------------------------------------------------------------|----------|
| <b>COMPLIANCE STATEMENT .....</b>                                                         | <b>3</b> |
| <b>QUALITY ASSURANCE STATEMENT .....</b>                                                  | <b>4</b> |
| <b>SIGNATURE PAGE.....</b>                                                                | <b>5</b> |
| <b>ABBREVIATIONS .....</b>                                                                | <b>6</b> |
| <b>STUDY INFORMATION PAGE .....</b>                                                       | <b>7</b> |
| I.    SUMMARY .....                                                                       | 10       |
| II.   PURPOSE .....                                                                       | 11       |
| III.  MATERIALS AND METHODS .....                                                         | 11       |
| A. <i>Test Article</i> .....                                                              | 11       |
| B. <i>Vehicle</i> .....                                                                   | 11       |
| C. <i>Dose Preparation</i> .....                                                          | 11       |
| D. <i>Test System</i> .....                                                               | 12       |
| 1.  Animals .....                                                                         | 12       |
| 2.  Housing.....                                                                          | 12       |
| 3.  Husbandry.....                                                                        | 12       |
| E. <i>Test Procedure</i> .....                                                            | 13       |
| 1.  Randomization .....                                                                   | 13       |
| 2.  Treatment.....                                                                        | 13       |
| 3.  Body Weights .....                                                                    | 13       |
| 4.  Clinical Observations .....                                                           | 13       |
| 5.  Blood Collection .....                                                                | 14       |
| 6.  Necropsy .....                                                                        | 14       |
| F. <i>Statistics</i> .....                                                                | 15       |
| 1.  Body Weight.....                                                                      | 15       |
| 2.  Organ Weights .....                                                                   | 15       |
| 3.  Clinical Pathology.....                                                               | 15       |
| G. <i>Deviations from the Protocol</i> .....                                              | 16       |
| IV.  REFERENCES .....                                                                     | 17       |
| V.   ARCHIVES .....                                                                       | 18       |
| VI.  RESULTS.....                                                                         | 18       |
| 1.  Body Weights.....                                                                     | 18       |
| 2.  Survival and Clinical Observations.....                                               | 18       |
| 3.  Clinical Pathology.....                                                               | 19       |
| 4.  Pathology/Histology .....                                                             | 19       |
| VII. CONCLUSION.....                                                                      | 20       |
| VIII. APPENDICES .....                                                                    | 28       |
| APPENDIX A – <i>PROTOCOL</i> .....                                                        | 29       |
| APPENDIX B – <i>CLINICAL PATHOLOGY REPORT</i> .....                                       | 47       |
| APPENDIX C – <i>PATHOLOGY REPORT</i> .....                                                | 110      |
| APPENDIX D – <i>CERTIFICATE OF ANALYSIS FOR VEHICLE COMPONENTS AND TEST ARTICLE</i> ..... | 176      |
| APPENDIX E – <i>STATISTICAL REPORT</i> .....                                              | 185      |



## Tables

|                                                                         |    |
|-------------------------------------------------------------------------|----|
| TABLE 1: EXPERIMENTAL DESIGN .....                                      | 13 |
| TABLE 2: TISSUES COLLECTED FOR HISTOLOGY .....                          | 14 |
| TABLE 3: ORGANS WEIGHED DURING NECROPSY .....                           | 15 |
| TABLE 4: DAY 1 BODYWEIGHTS FOR MALE AND FEMALE RATS .....               | 21 |
| TABLE 5: DAY 2 (PRE-FASTED) BODYWEIGHTS FOR MALE AND FEMALE RATS .....  | 22 |
| TABLE 6: DAY 3 (FASTED) BODYWEIGHTS FOR MALE AND FEMALE RATS .....      | 22 |
| TABLE 7: DAY 8 BODYWEIGHTS FOR MALE AND FEMALE RATS .....               | 23 |
| TABLE 8: DAY 14 (PRE-FASTED) BODYWEIGHTS FOR MALE AND FEMALE RATS ..... | 23 |
| TABLE 9: DAY 15 (FASTED) BODYWEIGHTS FOR MALE AND FEMALE RATS .....     | 24 |
| TABLE 10: BODYWEIGHT GAINS (BWG) FOR MALE AND FEMALE RATS .....         | 25 |
| TABLE 11: ORGAN WEIGHTS FOR MALE AND FEMALE RATS- DAY 3 .....           | 26 |
| TABLE 12: ORGAN WEIGHTS FOR MALE AND FEMALE RATS- DAY 15 .....          | 27 |

## I. SUMMARY

The purpose of this study was to evaluate the toxicity of [<sup>19</sup>F]FP-R<sub>0</sub>1-MG-F2 following a single intravenous dose in rats. This study consisted of one test article treatment group of ten male and ten female Sprague-Dawley rats dosed with [<sup>19</sup>F]FP-R<sub>0</sub>1-MG-F2 (note - small molecule only, [<sup>19</sup>F] is in place of [<sup>18</sup>F] radioactive component which will be used clinically) at 1.10 mg/kg, equivalent to 250x the anticipated clinical dose. An additional group of ten males and ten females received the vehicle, 10% Ethanol in Sterile Saline, and served as the control. All rats received a dose volume of 5 mL/kg. The rats were dosed intravenously once on Study Day 1. Five male and five female rats from each group were bled on Study Day 3 and the remaining rats were bled on Study Day 15. All animals were euthanized and necropsied following blood collection. Parameters evaluated for test article effect included survival, clinical observations, body weight, body weight gain, clinical pathology, gross pathology, organ weights, and microscopic pathology.

All rats survived to the scheduled termination and remained bright, alert and responsive during the study. No abnormal findings were indicated during mortality checks (cagesides) or hands-on observations. There was significant increase in bodyweights on Day 3 for treated females, but this does not appear to be treatment related.

Treated male rats showed a statistically significant elevation in white blood cell parameters, select red blood cell factors, and select chemistry parameters but the changes do not seem to be related to treatment related. Treated females showed a statistically significant decrease in certain coagulation factors, but these changes do not appear to be treatment related either.

No treatment-related findings were noted in organ weights or microscopic pathology findings.

Under the conditions of this study, there were no treatment related findings in Sprague Dawley rats three or fifteen days after a single intravenous dose of [<sup>19</sup>F]FP-R<sub>0</sub>1-MG-F2 at 1.10 mg/kg.

## II. PURPOSE

The purpose of this study was to evaluate the toxicity of [<sup>19</sup>F]FP-R<sub>0</sub>1-MG-F2 following a single intravenous dose in rats.

## III. MATERIALS AND METHODS

### A. Test Article

The test article (TA), [<sup>19</sup>F]FP-R<sub>0</sub>1-MG-F2, was received from the Sponsor on August 25, 2014, described as a white powder. The test article was stored frozen in a glass vial. Copies of the Test Article Data Sheets are included in Appendix D.

Note: Test article name as per the Quality Control Record (Appendix D) is listed as FP-GLY-36-Gly-NH<sub>2</sub>, which represents the chemical structure. The test article is referred to by the commercial name provided by the client ([<sup>19</sup>F]FP-R<sub>0</sub>1-MG-F2) throughout this report and in the raw study data.

| Name                                        | Lot No. | Supplier                    | Purity |
|---------------------------------------------|---------|-----------------------------|--------|
| [ <sup>19</sup> F]FP-R <sub>0</sub> 1-MG-F2 | N149    | C S Bio Co.; Menlo Park, CA | 95.48% |

### B. Vehicle

The vehicle used in this study was 10% Ethanol in Sterile Saline (0.9% sodium chloride, USP). The vehicle components were purchased commercially by SoBran and stored at room temperature in accordance with the manufacturer instructions. Copies of the Certificate of Analyses for the lots of 10% Ethanol and Sterile Saline used are included in Appendix D.

| Name                      | Lot No.   | Supplier                        | Concentration |
|---------------------------|-----------|---------------------------------|---------------|
| Ethanol (200 proof), USP  | SHBB0212V | Sigma Aldrich; Saint Louis, MO. | 99.87%        |
| 0.9% Sodium Chloride, USP | C886374   | Baxter; Cleveland, MS           | 0.888%        |

### C. Dose Preparation

The 0.22 mg/mL test article solution was prepared by adding 40 mL of 10% ethanol solution (vehicle control) to 8.8 mg of the test article, mixed gently, and then filtered using a 2 $\mu$  sterile syringe filter. The pH of the 10% ethanol solution was adjusted using HCl and NaOH to achieve a pH of 7.4. The vehicle was passed through a 2 $\mu$  sterile syringe filter after pH adjustment. The test article solution pH remained 7.4 and, therefore, did not need further pH adjustment.

## D. Test System

### 1. Animals

On October 2, 2014, 21 male and 21 female Sprague-Dawley rats were obtained from Harlan, Frederick, MD. The supplier verified that the animals were free of specific active infectious diseases prior to arrival at the SoBran facility. At initiation of dosing, the male and female rats were 7 weeks of age, (Date of Birth: 8/15/14). At randomization the body weights of the rats used on study ranged from 199.05 to 218.61 grams (males) and 140.99 to 159.28 grams (females).

Rats were chosen for use in this study since they are considered an acceptable animal model for the rodent species for acute toxicity tests prior to clinical use.

### 2. Housing

The animals were housed following the specifications recommended in The Guide for the Care and Use of Laboratory Animals, Eighth Edition (National Academy Press, Washington, D.C., 2011). Animals were housed in an environmentally controlled room which maintained the temperatures of 68 to 79°F. The facility maintained a relative humidity of 30 to 70% with a 12-hour light/12-hour dark cycle. Animals were group housed (up to 3 per cage) based on group/sex designation in individually ventilated microisolator cages. Contact sani-chips bedding (Harlan TEKLAD, Indianapolis, IN) was used to absorb liquids. Bedding analysis records are on file in the facility and did not reveal any contaminants that would have an effect on the results of the study.

Access to the Animal Facility is dictated by Standard Operating Procedures (SOPs) and was restricted to authorized personnel only.

### 3. Husbandry

The animals were provided *ad libitum* access to drinking water (Baltimore City Water System, Baltimore, MD) via water bottles. The animals were provided *ad libitum* access to Harlan TEKLAD Certified Global Rodent Diet 2016C (Harlan TEKLAD, Indianapolis, IN) except when fasted overnight prior to blood collection. Rats were also offered enrichment devices of polycarbonate red tubes. Periodic water analyses and individual feed lot analyses (on file at SoBran) did not reveal any contaminants that would have an effect on the results of the study. The animals were acclimated for five days prior to dosing. No disease-related signs were noted during acclimation period. Prior to being placed on test, the Clinical Veterinarian approved all the animals for study use. All animals assigned to the study appeared normal on Day 1 prior to dosing.

## E. Test Procedure

### 1. Randomization

The animals were randomized on October 6, 2014 by body weight into two groups of 10 male and 10 female rats using a computer-generated randomization program, Excel. The animals were group housed (up to 3 per cage). Each animal was assigned a unique identification number that was displayed using stainless steel ear tags and also on a card on the front of each cage. Raw data and records were also identified with the animal number.

### 2. Treatment

Dosing was initiated on October 7, 2014. Each rat was dosed once intravenously via the lateral tail vein with 5 mL/kg of the test article formulation or vehicle control. See Table 1 for a summary of the experimental design:

**Table 1: Experimental Design**

| Group                                                       | Dose Concentration | Total Number of Animals |        |               |        |
|-------------------------------------------------------------|--------------------|-------------------------|--------|---------------|--------|
|                                                             |                    | Day 3 Cohort            |        | Day 15 Cohort |        |
|                                                             |                    | Male                    | Female | Male          | Female |
| 1. Control (10% Ethanol in 0.9% Sterile Saline)             | 0 mg/mL            | 5                       | 5      | 5             | 5      |
| 2. [ <sup>19</sup> F]FP-R <sub>0</sub> 1-MG-F2 (1.10 mg/kg) | 0.22 mg/mL         | 5                       | 5      | 5             | 5      |

### 3. Body Weights

Body weights of individual animals were taken for randomization (pretest) and on Study Day 1 (for calculating individual dose volumes). Day 3 cohort animals were also weighed individually on Study Days 2 (pre-fasting) and 3 (post-fasting). Day 15 cohort animals were also weighed on Study Days 8, 14 (pre-fasting) and 15 (post-fasting).

### 4. Clinical Observations

During the course of this study, all animals were observed twice daily for moribundity, mortality, signs of toxicity and overall appearance (cageside observations). Clinical hands-on observations were collected on Study Days 1, 2 and 3 (for animals terminated on Day 3), or on Study Days 1, 8, 14 and 15 (for animals terminated on Day 15).

## 5. Blood Collection

Five male and five female rats from each group were bled on Study Day 3 and the remaining five male and five female rats from each group were bled on Study Day 15. Immediately prior to bleeding the animals were anesthetized with Isoflurane and then bled from the retro orbital sinus. Each animal had a hematology sample collected into a tube containing K<sub>2</sub> EDTA, a clinical chemistry sample collected into a serum separator tube and a coagulation factor sample collected in a sodium citrate tube. Each tube was individually labeled (date, group, sex, and animal number). The hematology samples were sent to Bioanalytical Systems, Inc. (BASI) on cold packs the same day as collection for first overnight delivery. The clinical chemistry and coagulations samples were centrifuged, serum/plasma drawn off and placed into individually labeled vials, and stored frozen until shipped on dry ice to BASI following study termination. The clinical pathology report is provided in Appendix B.

Note- multiple coagulation samples (including all fibrinogen analysis) could not be processed due to inadequate volume required for testing/resampling procedures. The non-processed samples are addressed in the clinical pathology report (Appendix B) and documented as a deviation (as applicable) in Section G.

## 6. Necropsy

Following blood collection, animals were euthanized using CO<sub>2</sub> overdose, followed by a thoracotomy to ensure death. A comprehensive necropsy was then performed for each animal. Once the lungs were examined and weighed they were inflated with formalin to ensure proper fixation. All tissues were placed in an individually labeled container containing 10% neutral-buffered formalin, with the exception of testis (males) and eyes with optic nerves, which were preserved in modified Davidson's fixative. Testis and eyes with optic nerves were transferred from the modified Davidson's solution to 70% Ethanol following collection. All containers were labeled with study number, date, group number, animal number, and Cohort (Day 3 or 15). The pathology report is provided in Appendix C. See Table 2 for the specific tissues that were collected and Table 3 for the organs that were weighed during necropsy:

**Table 2: Tissues Collected for Histology**

|                            |                                  |
|----------------------------|----------------------------------|
| Brain                      | Lungs                            |
| Cecum                      | Lymph node (mesenteric)          |
| Colon                      | Ovaries (2) (females)            |
| Eyes with optic nerves (2) | Salivary glands (mandibular) (2) |
| Heart                      | Spleen                           |
| Ileum                      | Testes (2) (males)               |
| Injection site             | Thyroid with parathyroid (2)     |
| Kidneys (2)                | Trachea                          |
| Lesions (if present)       | Urinary bladder                  |
| Liver                      |                                  |

**Table 3: Organs Weighed During Necropsy**

|                        |                          |
|------------------------|--------------------------|
| Brain                  | Lungs                    |
| Eyes with optic nerves | Ovaries                  |
| Heart                  | Spleen                   |
| Kidneys                | Testes                   |
| Liver                  | Thyroid with parathyroid |

**F. Statistics****1. Body Weight**

Comprehensive statistical analysis (mean, standard deviations, N) was conducted for group mean body weight data comparing treated groups to the control group of each sex using one-way Analysis of Variance (ANOVA) followed by Dunnett's t-test if there is significance. The probability value of less than 0.05 (two-tailed) was used as the critical level of significance for all tests.

**2. Organ Weights**

Comprehensive statistical analysis (mean, standard deviations, N) was conducted for organ weight data comparing treated groups to the control group of each sex using one-way Analysis of Variance (ANOVA) followed by Dunnett's t-test if there is significance. The probability value of less than 0.05 (two-tailed) was used as the critical level of significance for all tests.

**3. Clinical Pathology**

Comprehensive statistical analysis (mean, standard deviations, N) was conducted for clinical pathology data comparing treated groups to the control group of each sex using one-way Analysis of Variance (ANOVA), followed by Dunnett's t-test if there is significance. The probability value of less than 0.05 (two-tailed) was used as the critical level of significance for all tests.

## G. Deviations from the Protocol

1. NCR-0109: Protocol section 10.9 states that organ weights will be collected for select tissues. The following animals/tissues were missing weights due to placement in formalin prior to weight collection: #823, Group 1, female - missing weights for both ovaries and thyroid with parathyroid; #833, Group 2, female - missing weight for one ovary.

Resolution: Missing organ weights do not impact study outcome. Adequate weights were collected on additional animals within each group to provide statistical comparison. Organs are in formalin so they can still be processed and observed for microscopic changes.

2. NCR-0110: Protocol section 10.9 states that tissues preserved in modified Davidson's fixative will be transferred to ethanol 1-2 days following the necropsy. Cohort Day 3 tissues (testis and eyes with optic nerve) were transferred to 70% ethanol 11 days following the 10/9/14 necropsy.

Resolution: Information was forwarded to Pathologist to take into account when examining tissues. He reported that there were no issues reading the slides for the eyes and testes due to being left in the Davidson's fixative for an extended period of time. This deviation has no impact on the study.

3. NCR-0111: On 10/21/14 (Day 15) The following animals/tissues had weights taken before the scale was pre-calibrated #828, Group 1 – Female: all organs (brain, eyes with optic nerves, heart, kidneys, liver, lungs, ovaries, spleen and thyroid with parathyroid); #806, Group 1 – Male: testes. SOP-FSO-420, Section 5.4 states to calibrate the analytical scale by collecting 3 weights from a set of analytical weights prior to weighing anything.

Resolution: The late scale calibration has no impact on the study integrity. Scale was properly calibrated during organ weight collection of the second animal necropsied that day and was found to be within normal limits.

4. NCR-0121: As per protocol section 10.7, Fibrinogen (a coagulation factor) should be analyzed for all animals on study. The clinical pathology lab stated the plasma volumes for the coagulation samples collected for both Day 3 and Day 15 animals were insufficient to run Fibrinogen analysis. This parameter was therefore excluded from the study data.

Resolution: The clinical pathology lab contacted the Study Director on 10/23/14 to inform SoBran that there would not be adequate plasma volume to run all three coagulation tests as stated in the protocol. The Study Director decided to exclude Fibrinogen since that test requires the largest volume and the other tests (PTT and APTT) should provide adequate data to show if the test article had effects on the coagulation factors. The lack of Fibrinogen data has no study impact.



5. NCR-0122: Protocol Section 10.5 states that animals need to be checked once daily in AM during acclimation. The following dates had checks done in the PM: 10/4/14, 10/5/14 and 10/6/14.

Resolution: There is no study impact since animals were checked at least once daily, which satisfies welfare compliance.

6. NCR-0123: Testes and eyes with optic nerves were transfer to 70% Ethanol by SoBran staff prior to transfer to the histology lab. The protocol states the transfer will be documented in the histology records (Section 10.9), but this was not possible since the tissues were transferred prior to being shipped to the histology lab. The transfer was documented via memos that will be retained in the study files.

Resolution: A memo was written to address the location of the documentation for the tissue transfer. It was decided that a protocol amendment for this single item was not necessary since the location of the actual tissue transfer and documentation has no impact on study integrity as long as it was documented (which was done via memos included in the raw data files).

#### IV. REFERENCES

Historical clinical pathology data reference - Harlan Hsd:Sprague Dawley complete blood count and serum chemistry data which is available on the Harlan Research Laboratories website

SBR-SOP-GFO-203 Facility Access and Entry  
SBR-SOP-GFO-206 Ordering Receipt and Storage of Feed and Bedding  
SBR-SOP-GFO-208 Storage and Shipment of Blood and Tissue Samples  
SBR-SOP-FEC-501 Monitoring and Control of Temperature and Humidity  
SBR-SOP-FEC-502 Monitoring and Control of Facility Lighting  
SBR-SOP-FEC-504 Responding to Facility Alarms for Environmental Controls  
SBR-SOP-FEC-505 Use and Maintenance of Dickson Chart Recorder  
SBR-SOP-FSO-415 Equipment Calibration and Certification  
SBR-SOP-FSO-420 Operation of the Sartorius Practum 224-1S Analytical Balance  
SBR-SOP-FSO-421 Operation of the Ohaus EP4102C Balance  
SBR-SOP-FSO-423 Operation and Maintenance of the Accuspin Micro 17/17R Centrifuge  
SBR-SOP-HUP-601 Husbandry and Health Monitoring Procedures  
SBR-SOP-HUP-605 Environmental Enrichment for Rodents  
SBR-SOP-HUP-612 Innovative Cage Change Procedures - Rats  
SBR-SOP-AOR-701 Ordering, Receiving and Housing Animals  
SBR-SOP-TDU-806 Blood Collection Procedures for Rodents  
SBR-SOP-TDU-807 Injection Procedures and Guidelines for Rodents  
SBR-SOP-TDU-809 Animal Identification-Ear tags  
SBR-SOP-TDU-818 Comprehensive Necropsy Procedures in Rodents  
SBR-SOP-TDU-819 Collecting Organ Weights  
SBR-SOP-TDU-824 Randomization/Allocation Using Microsoft Excel  
SBR-SOP-TDU-826 Isoflurane Machine Maintenance and Use  
SBR-SOP-TDU-827 Clinical Observations in Rodents

## V. ARCHIVES

Raw data generated by the testing facility, any communication regarding the conduct of the study, and a copy of the final report will be stored in SoBran's archive room at the SoBran BioScience office in Burtonsville, Maryland for 5 years following the issuance of the final report. Retention samples of the dose formulations will be retained for this study and stored at the Rangos animal facility in Baltimore, Maryland for 2 years following the issuance of this report.

Archiving of raw data and reports provided by the subcontracted clinical pathology lab is noted in the final clinical pathology report (refer to Appendix B). A hard copy of the final clinical pathology report will be archived by SoBran in Burtonsville, Maryland with other study raw data.

Pathology raw data, a copy of the pathology report final report, tissues, blocks, and slides will be archived at HSRL archive facilities in Mount Jackson, Virginia following issuance of the final pathology report. All raw pathology data and a copy for the final pathology report will be retained for a period of 5 years following issuance of the final study report. All tissues, blocks, and slides will be retained for a period of 2 years prior to proper disposal or transfer to the client. A hard copy of the final clinical pathology report will be archived by SoBran in Burtonsville, Maryland with other study raw data.

## VI. RESULTS

### 1. Body Weights

Mean and individual body weights are presented in Table 4 (Day 1), Table 5 (Day 2), Table 6 (Day 3), Table 7 (Day 8), Table 8 (Day 14) and Table 9 (Day 15).

Mean and individual body weight gains (BWG) are presented Table 10. In the Day 3 cohort, one vehicle control male, two vehicle control females and two treated female rats lost weight between Days 1-2. All Day 3 cohort rats lost weight between Days 1-3 after being fasted, except for one male vehicle control and two male treated rats. In the Day 15 cohort, one female vehicle control and one female treated rat lost weight between Days 8-15 but, all other rats gained weight during that time. All Day 15 cohort rats gained weight between Days 1-8, 8-14, 1-14 and 1-15 and lost weight after being fasted on Days 14-15.

There was a significant increase in bodyweights for treated (Group 2) Females on Day 3 when compared to the control value,  $p < 0.05$  for the Female controls (Group 1). Although this difference is significant, it is a single incident and does not appear to be treatment related.

### 2. Survival and Clinical Observations

All rats survived to the scheduled termination date and remained bright, alert and responsive during the course of this study. No abnormal findings were indicated during daily mortality (cageside) or hands-on observations.

### 3. Clinical Pathology

The final clinical pathology report is provided in Appendix B. There were no treatment-related findings from clinical chemistry, hematology, and coagulation samples collected on Study Days 3 and 15.

For hematology samples, statistical analysis of the data for study Day 3 revealed white blood cell counts (WBC), absolute lymphocyte counts (ALY), absolute monocyte counts (AMO), and absolute large unstained cell counts (ALUC) were increased as compared to the control value,  $p < 0.05$  for Group 2 males. On Day 15, Group 2 males showed a statistically significant increase in mean corpuscular hemoglobin (MCH) as compared to the control value,  $p < 0.05$ . All levels were found to be within the standard historical range for Sprague Dawley rats, the changes are not believed to be biologically meaningful because of the small magnitude of the difference from the control values. Refer to Section IV for historical reference.

For coagulation samples, statistical analysis of the data for study Day 15 showed a statistically significant decrease in activated partial thromboplastin time as compared to the control value,  $p < 0.05$  for Group 2 females. All levels were found to be within the standard historical range for Sprague Dawley rats, and therefore do not appear to be treatment related. Refer to Section IV for historical reference.

For clinical chemistry samples, statistical analysis of the data for study Day 3 revealed that alkaline phosphatase (ALP) showed a significant increase as compared to the control value,  $p < 0.05$  for Group 2 males. On study Days 3 and 15 alanine aminotransferase (ALT) was elevated as compared to the control value,  $p < 0.05$  for Group 2 males. Although these values do appear higher than the historical reference range and show statistical significance, the changes are not believed to be biologically meaningful because of the small magnitude of the difference from the control values. Refer to Section IV for historical reference.

### 4. Pathology/Histology

Protocol specified organ weights are shown in Tables 10 and 11. The final pathology report is provided in Appendix C.

No treatment-related findings and statistical significance were noted in the organ weights or microscopic pathology findings. The test article, [ $^{19}\text{F}$ ]FP-R<sub>0</sub>1-MG-F2 at 1.10 mg/kg had no adverse effects in any of the tissues examined.

## VII. CONCLUSION

The goal of this study was to evaluate the toxicity of [<sup>19</sup>F]FP-R<sub>0</sub>1-MG-F2 three and fifteen days following a single intravenous dose.

Animals remained bright, alert, and responsive at all times and did not exhibit signs of toxicity during the conduct of the study. No treatment-related differences were noted in mean body weights and body weight changes, clinical chemistry, hematology, or coagulation parameters. In addition, no treatment-related effects were observed organ weights or in gross and microscopic pathology.

Under the conditions of this study, there were no treatment related findings in Sprague Dawley rats three or fifteen days after a single intravenous dose of [<sup>19</sup>F]FP-R<sub>0</sub>1-MG-F2 at 1.10 mg/kg.

**Table 4: Day 1 Bodyweights for Male and Female Rats**

| Animal Number | Group/ Sex | Bodyweight (g) | Animal Number | Group/ Sex | Bodyweight (g) |
|---------------|------------|----------------|---------------|------------|----------------|
| 801           | 1/M        | 209.18         | 823           | 1/F        | 151.91         |
| 802           | 1/M        | 206.54         | 824           | 1/F        | 149.54         |
| 803           | 1/M        | 205.90         | 825           | 1/F        | 146.70         |
| 804           | 1/M        | 219.91         | 826           | 1/F        | 147.89         |
| 805           | 1/M        | 205.25         | 827           | 1/F        | 154.81         |
| 806           | 1/M        | 211.33         | 828           | 1/F        | 152.89         |
| 807           | 1/M        | 213.74         | 829           | 1/F        | 158.21         |
| 808           | 1/M        | 213.20         | 830           | 1/F        | 152.50         |
| 809           | 1/M        | 207.12         | 831           | 1/F        | 151.91         |
| 810           | 1/M        | 204.58         | 832           | 1/F        | 148.87         |
| Mean          |            | 209.68         | Mean          |            | 151.52         |
| SD            |            | 4.86           | SD            |            | 3.43           |
|               |            |                |               |            |                |
| 811           | 2/M        | 199.43         | 833           | 2/F        | 153.87         |
| 812           | 2/M        | 209.47         | 834           | 2/F        | 151.37         |
| 813           | 2/M        | 209.00         | 835           | 2/F        | 157.87         |
| 814           | 2/M        | 210.57         | 836           | 2/F        | 152.01         |
| 815           | 2/M        | 213.35         | 837           | 2/F        | 154.70         |
| 816           | 2/M        | 211.76         | 838           | 2/F        | 152.16         |
| 817           | 2/M        | 205.89         | 839           | 2/F        | 150.51         |
| 818           | 2/M        | 204.12         | 840           | 2/F        | 153.83         |
| 819           | 2/M        | 212.16         | 841           | 2/F        | 142.77         |
| 820           | 2/M        | 204.08         | 842           | 2/F        | 149.61         |
| Mean          |            | 207.98         | Mean          |            | 151.87         |
| SD            |            | 4.45           | SD            |            | 3.97           |

**Table 5: Day 2 (pre-fasted) Bodyweights for Male and Female Rats**

| Animal Number | Group/ Sex | Bodyweight (g) | Animal Number | Group/ Sex | Bodyweight (g) |
|---------------|------------|----------------|---------------|------------|----------------|
| 801           | 1/M        | 208.37         | 823           | 1/F        | 150.11         |
| 802           | 1/M        | 207.51         | 824           | 1/F        | 148.07         |
| 803           | 1/M        | 214.84         | 825           | 1/F        | 147.53         |
| 804           | 1/M        | 222.12         | 826           | 1/F        | 154.39         |
| 805           | 1/M        | 209.76         | 827           | 1/F        | 158.85         |
| Mean          |            | 212.52         | Mean          |            | 151.79         |
| SD            |            | 6.07           | SD            |            | 4.78           |
| 811           | 2/M        | 203.22         | 833           | 2/F        | 154.58         |
| 812           | 2/M        | 209.88         | 834           | 2/F        | 150.58         |
| 813           | 2/M        | 210.79         | 835           | 2/F        | 153.65         |
| 814           | 2/M        | 214.90         | 836           | 2/F        | 156.79         |
| 815           | 2/M        | 223.10         | 837           | 2/F        | 155.51         |
| Mean          |            | 212.38         | Mean          |            | 154.22         |
| SD            |            | 7.31           | SD            |            | 2.34           |

**Table 6: Day 3 (fasted) Bodyweights for Male and Female Rats**

| Animal Number | Group/ Sex | Bodyweight (g) | Animal Number | Group/ Sex | Bodyweight (g) |
|---------------|------------|----------------|---------------|------------|----------------|
| 801           | 1/M        | 202.31         | 823           | 1/F        | 144.22         |
| 802           | 1/M        | 203.44         | 824           | 1/F        | 143.83         |
| 803           | 1/M        | 207.12         | 825           | 1/F        | 142.89         |
| 804           | 1/M        | 215.23         | 826           | 1/F        | 146.84         |
| 805           | 1/M        | 201.67         | 827           | 1/F        | 149.69         |
| Mean          |            | 205.95         | Mean          |            | 145.49         |
| SD            |            | 5.60           | SD            |            | 2.77           |
| 811           | 2/M        | 198.58         | 833           | 2/F        | 147.96         |
| 812           | 2/M        | 204.07         | 834           | 2/F        | 151.35         |
| 813           | 2/M        | 206.66         | 835           | 2/F        | 149.17         |
| 814           | 2/M        | 215.98         | 836           | 2/F        | 148.96         |
| 815           | 2/M        | 224.38         | 837           | 2/F        | 147.55         |
| Mean          |            | 209.93         | Mean          |            | 149.00         |
| SD            |            | 10.24          | SD            |            | 1.48           |

**Table 7: Day 8 Bodyweights for Male and Female Rats**

| Animal Number | Group/ Sex | Bodyweight (g) | Animal Number | Group/ Sex | Bodyweight (g) |
|---------------|------------|----------------|---------------|------------|----------------|
| 806           | 1/M        | 248.95         | 828           | 1/F        | 174.81         |
| 807           | 1/M        | 251.46         | 829           | 1/F        | 179.32         |
| 808           | 1/M        | 254.46         | 830           | 1/F        | 173.39         |
| 809           | 1/M        | 250.08         | 831           | 1/F        | 178.61         |
| 810           | 1/M        | 245.14         | 832           | 1/F        | 162.30         |
| Mean          |            | 250.02         | Mean          |            | 173.69         |
| SD            |            | 3.42           | SD            |            | 6.84           |
| 816           | 2/M        | 251.42         | 838           | 2/F        | 173.63         |
| 817           | 2/M        | 243.66         | 839           | 2/F        | 173.53         |
| 818           | 2/M        | 247.57         | 840           | 2/F        | 178.64         |
| 819           | 2/M        | 243.31         | 841           | 2/F        | 166.33         |
| 820           | 2/M        | 245.03         | 842           | 2/F        | 185.14         |
| Mean          |            | 246.20         | Mean          |            | 175.45         |
| SD            |            | 3.37           | SD            |            | 6.97           |

**Table 8: Day 14 (pre-fasted) Bodyweights for Male and Female Rats**

| Animal Number | Group/ Sex | Bodyweight (g) | Animal Number | Group/ Sex | Bodyweight (g) |
|---------------|------------|----------------|---------------|------------|----------------|
| 806           | 1/M        | 286.52         | 828           | 1/F        | 195.95         |
| 807           | 1/M        | 279.91         | 829           | 1/F        | 192.71         |
| 808           | 1/M        | 281.42         | 830           | 1/F        | 178.81         |
| 809           | 1/M        | 277.51         | 831           | 1/F        | 190.75         |
| 810           | 1/M        | 270.34         | 832           | 1/F        | 176.10         |
| Mean          |            | 279.14         | Mean          |            | 186.86         |
| SD            |            | 5.92           | SD            |            | 8.84           |
| 816           | 2/M        | 283.76         | 838           | 2/F        | 183.01         |
| 817           | 2/M        | 270.73         | 839           | 2/F        | 186.02         |
| 818           | 2/M        | 279.26         | 840           | 2/F        | 187.58         |
| 819           | 2/M        | 273.84         | 841           | 2/F        | 178.99         |
| 820           | 2/M        | 273.47         | 842           | 2/F        | 203.68         |
| Mean          |            | 276.21         | Mean          |            | 187.86         |
| SD            |            | 5.23           | SD            |            | 9.43           |

**Table 9: Day 15 (fasted) Bodyweights for Male and Female Rats**

| Animal Number | Group/ Sex | Bodyweight (g) | Animal Number | Group/ Sex | Bodyweight (g) |
|---------------|------------|----------------|---------------|------------|----------------|
| 806           | 1/M        | 279.44         | 828           | 1/F        | 186.02         |
| 807           | 1/M        | 267.92         | 829           | 1/F        | 182.90         |
| 808           | 1/M        | 269.08         | 830           | 1/F        | 173.17         |
| 809           | 1/M        | 269.54         | 831           | 1/F        | 180.75         |
| 810           | 1/M        | 266.15         | 832           | 1/F        | 166.92         |
| Mean          |            | 270.43         | Mean          |            | 177.95         |
| SD            |            | 5.21           | SD            |            | 7.78           |
|               |            |                |               |            |                |
| 816           | 2/M        | 275.69         | 838           | 2/F        | 177.50         |
| 817           | 2/M        | 262.76         | 839           | 2/F        | 177.43         |
| 818           | 2/M        | 267.11         | 840           | 2/F        | 178.43         |
| 819           | 2/M        | 261.76         | 841           | 2/F        | 173.63         |
| 820           | 2/M        | 265.08         | 842           | 2/F        | 192.24         |
| Mean          |            | 266.48         | Mean          |            | 179.85         |
| SD            |            | 5.55           | SD            |            | 7.17           |



**Table 10: Bodyweight Gains (BWG) for Male and Female Rats**

| Animal Number | Group/ Sex | BWG(g) Days 1-2 | BWG(g) Days 1-3 | BWG(g) Days 1-8 | BWG(g) Days 8-14 | BWG(g) Days 8-15 | BWG(g) Days 14-15 | BWG(g) Days 1-14 | BWG(g) Days 1-15 |
|---------------|------------|-----------------|-----------------|-----------------|------------------|------------------|-------------------|------------------|------------------|
| 801           | 1/M        | -0.81           | -6.87           |                 |                  |                  |                   |                  |                  |
| 802           | 1/M        | 0.97            | -3.10           |                 |                  |                  |                   |                  |                  |
| 803           | 1/M        | 8.94            | 1.22            |                 |                  |                  |                   |                  |                  |
| 804           | 1/M        | 2.21            | -4.68           |                 |                  |                  |                   |                  |                  |
| 805           | 1/M        | 4.51            | -3.58           |                 |                  |                  |                   |                  |                  |
| 806           | 1/M        |                 |                 | 37.62           | 37.57            | 30.49            | -7.08             | 75.19            | 68.11            |
| 807           | 1/M        |                 |                 | 37.72           | 28.45            | 16.46            | -11.99            | 66.17            | 54.18            |
| 808           | 1/M        |                 |                 | 41.26           | 26.96            | 14.62            | -12.34            | 68.22            | 55.88            |
| 809           | 1/M        |                 |                 | 42.96           | 27.43            | 19.46            | -7.97             | 70.39            | 62.42            |
| 810           | 1/M        |                 |                 | 40.56           | 25.20            | 21.01            | -4.19             | 65.76            | 61.57            |
| 823           | 1/F        | -1.80           | -7.69           |                 |                  |                  |                   |                  |                  |
| 824           | 1/F        | -1.47           | -5.71           |                 |                  |                  |                   |                  |                  |
| 825           | 1/F        | 0.83            | -3.81           |                 |                  |                  |                   |                  |                  |
| 826           | 1/F        | 6.50            | -1.05           |                 |                  |                  |                   |                  |                  |
| 827           | 1/F        | 4.04            | -5.12           |                 |                  |                  |                   |                  |                  |
| 828           | 1/F        |                 |                 | 21.92           | 21.14            | 11.21            | -9.93             | 43.06            | 33.13            |
| 829           | 1/F        |                 |                 | 21.11           | 13.39            | 3.58             | -9.81             | 34.50            | 24.69            |
| 830           | 1/F        |                 |                 | 20.89           | 5.42             | -0.22            | -5.64             | 26.31            | 20.67            |
| 831           | 1/F        |                 |                 | 26.70           | 12.14            | 2.14             | -10.00            | 38.84            | 28.84            |
| 832           | 1/F        |                 |                 | 13.43           | 13.80            | 4.62             | -9.18             | 27.23            | 18.05            |
| 811           | 2/M        | 3.79            | -0.85           |                 |                  |                  |                   |                  |                  |
| 812           | 2/M        | 0.41            | -5.40           |                 |                  |                  |                   |                  |                  |
| 813           | 2/M        | 1.79            | -2.34           |                 |                  |                  |                   |                  |                  |
| 814           | 2/M        | 4.33            | 5.41            |                 |                  |                  |                   |                  |                  |
| 815           | 2/M        | 9.75            | 11.03           |                 |                  |                  |                   |                  |                  |
| 816           | 2/M        |                 |                 | 39.66           | 32.34            | 24.27            | -8.07             | 72.00            | 63.93            |
| 817           | 2/M        |                 |                 | 37.77           | 27.07            | 19.10            | -7.97             | 64.84            | 56.87            |
| 818           | 2/M        |                 |                 | 43.45           | 31.69            | 19.54            | -12.15            | 75.14            | 62.99            |
| 819           | 2/M        |                 |                 | 31.15           | 30.53            | 18.45            | -12.08            | 61.68            | 49.60            |
| 820           | 2/M        |                 |                 | 40.95           | 28.44            | 20.05            | -8.39             | 69.39            | 61.00            |
| 833           | 2/F        | 0.71            | -5.91           |                 |                  |                  |                   |                  |                  |
| 834           | 2/F        | -0.79           | -0.02           |                 |                  |                  |                   |                  |                  |
| 835           | 2/F        | -4.22           | -8.70           |                 |                  |                  |                   |                  |                  |
| 836           | 2/F        | 4.78            | -3.05           |                 |                  |                  |                   |                  |                  |
| 837           | 2/F        | 0.81            | -7.15           |                 |                  |                  |                   |                  |                  |
| 838           | 2/F        |                 |                 | 21.47           | 9.38             | 3.87             | -5.51             | 30.85            | 25.34            |
| 839           | 2/F        |                 |                 | 23.02           | 12.49            | 3.90             | -8.59             | 35.51            | 26.92            |
| 840           | 2/F        |                 |                 | 24.81           | 8.94             | -0.21            | -9.15             | 33.75            | 24.60            |
| 841           | 2/F        |                 |                 | 23.56           | 12.66            | 7.30             | -5.36             | 36.22            | 30.86            |
| 842           | 2/F        |                 |                 | 35.53           | 18.54            | 7.10             | -11.44            | 54.07            | 42.63            |

**Table 11: Organ Weights for Male and Female Rats- Day 3**

| Animal Number | Group / Sex | Brain  | Eyes with optic nerve | Heart  | Kidneys | Liver  | Lungs  | Ovaries (females) | Spleen | Testes (males) | Thyroid (both lobes with parathyroid) |
|---------------|-------------|--------|-----------------------|--------|---------|--------|--------|-------------------|--------|----------------|---------------------------------------|
| 801           | 1 / M       | 1.6187 | 0.2553                | 0.8236 | 1.5969  | 8.2068 | 1.3300 | N/A               | 0.4647 | 2.9974         | 0.0105                                |
| 802           | 1 / M       | 1.5895 | 0.2774                | 0.9431 | 1.7355  | 7.3524 | 1.3785 | N/A               | 0.4082 | 2.8174         | 0.0282                                |
| 803           | 1 / M       | 1.7611 | 0.3125                | 0.9733 | 1.5963  | 8.0136 | 2.0736 | N/A               | 0.5765 | 2.9797         | 0.0293                                |
| 804           | 1 / M       | 1.7167 | 0.2868                | 1.6078 | 1.6141  | 8.6535 | 1.6981 | N/A               | 0.5732 | 2.5926         | 0.0221                                |
| 805           | 1 / M       | 1.6767 | 0.2473                | 0.9815 | 1.7941  | 7.8703 | 1.8987 | N/A               | 0.6079 | 2.9330         | 0.0375                                |
|               | Mean        | 1.6725 | 0.2759                | 1.0659 | 1.6674  | 8.0193 | 1.6758 | N/A               | 0.5261 | 2.8640         | 0.0255                                |
|               | SD          | 0.0700 | 0.0260                | 0.3095 | 0.0916  | 0.4755 | 0.3226 | N/A               | 0.0853 | 0.1672         | 0.0100                                |
| 823           | 1 / F       | 1.4885 | 0.2791                | 0.6037 | 1.2982  | 5.9815 | 1.1521 | N/A*              | 0.4520 | N/A            | N/A*                                  |
| 824           | 1 / F       | 1.5898 | 0.2921                | 0.6100 | 1.2365  | 6.8848 | 1.3262 | 0.1635            | 0.4549 | N/A            | 0.0240                                |
| 825           | 1 / F       | 1.5144 | 0.2189                | 0.5775 | 1.2986  | 6.4101 | 1.5210 | 0.1782            | 0.5683 | N/A            | 0.0446                                |
| 826           | 1 / F       | 1.5544 | 0.2655                | 0.6572 | 1.3486  | 6.1701 | 1.4283 | 0.2033            | 0.5411 | N/A            | 0.0346                                |
| 827           | 1 / F       | 1.5940 | 0.2478                | 0.6720 | 1.3949  | 5.6276 | 1.3971 | 0.1348            | 0.4703 | N/A            | 0.0559                                |
|               | Mean        | 1.5482 | 0.2607                | 0.6241 | 1.3154  | 6.2148 | 1.3649 | 0.1700            | 0.4973 | N/A            | 0.0398                                |
|               | SD          | 0.0463 | 0.0286                | 0.0393 | 0.0596  | 0.4712 | 0.1380 | 0.0286            | 0.0537 | N/A            | 0.0136                                |
| 811           | 2 / M       | 1.7281 | 0.3290                | 0.8529 | 1.6206  | 8.4231 | 1.6850 | N/A               | 0.6353 | 3.0781         | 0.0290                                |
| 812           | 2 / M       | 1.7266 | 0.3450                | 0.9952 | 1.6078  | 7.6844 | 1.7598 | N/A               | 0.6231 | 3.0267         | 0.0335                                |
| 813           | 2 / M       | 1.8007 | 0.4062                | 0.8993 | 1.6440  | 8.1038 | 1.4014 | N/A               | 0.7603 | 3.0173         | 0.0301                                |
| 814           | 2 / M       | 1.6529 | 0.2498                | 1.0125 | 1.8016  | 8.5365 | 1.5284 | N/A               | 0.6047 | 2.8828         | 0.0295                                |
| 815           | 2 / M       | 1.6321 | 0.2780                | 0.9593 | 1.9042  | 9.7460 | 1.8096 | N/A               | 0.6770 | 2.9709         | 0.0276                                |
|               | Mean        | 1.7081 | 0.3216                | 0.9438 | 1.7156  | 8.4988 | 1.6368 | N/A               | 0.6601 | 2.9952         | 0.0299                                |
|               | SD          | 0.0673 | 0.0609                | 0.0668 | 0.1311  | 0.7717 | 0.1692 | N/A               | 0.0620 | 0.0734         | 0.0022                                |
| 833           | 2 / F       | 1.5601 | 0.3082                | 0.6630 | 1.3477  | 5.9531 | 1.1286 | N/A*              | 0.4127 | N/A            | 0.0466                                |
| 834           | 2 / F       | 1.4948 | 0.2457                | 0.5905 | 1.1751  | 5.9220 | 1.6180 | 0.1678            | 0.5219 | N/A            | 0.0408                                |
| 835           | 2 / F       | 1.5149 | 0.2349                | 0.6881 | 1.3088  | 5.6584 | 1.7632 | 0.1519            | 0.4723 | N/A            | 0.0351                                |
| 836           | 2 / F       | 1.5319 | 0.2678                | 0.7113 | 1.3993  | 6.3018 | 1.7209 | 0.1453            | 0.6027 | N/A            | 0.0538                                |
| 837           | 2 / F       | 1.7811 | 0.2640                | 0.6170 | 1.2061  | 5.9254 | 1.4211 | 0.1729            | 0.4677 | N/A            | 0.0631                                |
|               | Mean        | 1.5766 | 0.2641                | 0.6540 | 1.2874  | 5.9521 | 1.5304 | 0.1595            | 0.4955 | N/A            | 0.0479                                |
|               | SD          | 0.1168 | 0.0281                | 0.0498 | 0.0947  | 0.2292 | 0.2606 | 0.0130            | 0.0713 | N/A            | 0.0110                                |

\* Tissues inadvertently not weighed, therefore, not included in calculations.

**Table 12: Organ Weights for Male and Female Rats- Day 15**

| Animal Number | Group / Sex | Brain  | Eyes with optic nerve | Heart  | Kidneys | Liver   | Lungs  | Ovaries (females) | Spleen | Testes (males) | Thyroid (both lobes with parathyroid) |
|---------------|-------------|--------|-----------------------|--------|---------|---------|--------|-------------------|--------|----------------|---------------------------------------|
| 806           | 1 / M       | 1.8215 | 0.3210                | 1.1287 | 2.0317  | 11.6219 | 2.2523 | N/A               | 0.6086 | 3.7334         | 0.0347                                |
| 807           | 1 / M       | 1.4194 | 0.3285                | 1.1874 | 2.0879  | 12.0388 | 1.8053 | N/A               | 0.7695 | 3.7895         | 0.0908                                |
| 808           | 1 / M       | 1.2565 | 0.2822                | 0.9670 | 2.0368  | 10.7669 | 2.0478 | N/A               | 0.7287 | 3.1002         | 0.0210                                |
| 809           | 1 / M       | 1.4941 | 0.3395                | 1.2401 | 2.0416  | 10.1976 | 1.9069 | N/A               | 0.7420 | 3.5114         | 0.0307                                |
| 810           | 1 / M       | 1.8118 | 0.3176                | 1.1677 | 2.0815  | 10.3406 | 2.1579 | N/A               | 0.6748 | 3.3889         | 0.0333                                |
|               | Mean        | 1.5607 | 0.3178                | 1.1382 | 2.0559  | 10.9932 | 2.0340 | N/A               | 0.7047 | 3.5047         | 0.0421                                |
|               | SD          | 0.2490 | 0.0216                | 0.1038 | 0.0266  | 0.8060  | 0.1814 | N/A               | 0.0638 | 0.2786         | 0.0277                                |
| 828           | 1 / F       | 1.6569 | 0.3078                | 0.7368 | 1.3741  | 6.2577  | 1.4714 | 0.1797            | 0.6371 | N/A            | 0.0312                                |
| 829           | 1 / F       | 1.7590 | 0.3056                | 0.7411 | 1.5149  | 6.4332  | 1.5283 | 0.1207            | 0.5455 | N/A            | 0.0369                                |
| 830           | 1 / F       | 1.4810 | 0.2915                | 0.6506 | 1.3012  | 6.2672  | 1.3336 | 0.1556            | 0.5196 | N/A            | 0.0331                                |
| 831           | 1 / F       | 1.6596 | 0.3079                | 0.7004 | 1.4582  | 6.6302  | 1.8339 | 0.1632            | 0.5827 | N/A            | 0.0260                                |
| 832           | 1 / F       | 1.7192 | 0.3064                | 0.6669 | 1.3826  | 6.0050  | 1.2391 | 0.1621            | 0.5025 | N/A            | 0.0199                                |
|               | Mean        | 1.6551 | 0.3038                | 0.6992 | 1.4062  | 6.3187  | 1.4813 | 0.1563            | 0.5575 | N/A            | 0.0294                                |
|               | SD          | 0.1063 | 0.0070                | 0.0405 | 0.0824  | 0.2318  | 0.2275 | 0.0218            | 0.0538 | N/A            | 0.0066                                |
| 816           | 2 / M       | 1.5072 | 0.3435                | 1.1279 | 2.2353  | 11.7634 | 2.2251 | N/A               | 0.6466 | 3.7242         | 0.0214                                |
| 817           | 2 / M       | 1.7842 | 0.3364                | 1.0344 | 1.9431  | 11.0516 | 1.8475 | N/A               | 0.6990 | 3.5247         | 0.0362                                |
| 818           | 2 / M       | 1.5765 | 0.3205                | 1.0491 | 2.2130  | 10.5215 | 1.8609 | N/A               | 0.7520 | 3.6445         | 0.0190                                |
| 819           | 2 / M       | 1.6366 | 0.3185                | 1.0460 | 2.0494  | 11.0145 | 2.3093 | N/A               | 0.6968 | 3.3802         | 0.0178                                |
| 820           | 2 / M       | 1.4663 | 0.2833                | 1.0391 | 2.1277  | 11.7669 | 1.8611 | N/A               | 0.7009 | 3.6255         | 0.0246                                |
|               | Mean        | 1.5942 | 0.3204                | 1.0593 | 2.1137  | 11.2236 | 2.0208 | N/A               | 0.6991 | 3.5798         | 0.0238                                |
|               | SD          | 0.1246 | 0.0233                | 0.0388 | 0.1205  | 0.5368  | 0.2270 | N/A               | 0.0373 | 0.1323         | 0.0074                                |
| 838           | 2 / F       | 1.5021 | 0.3203                | 0.7094 | 1.3112  | 7.2205  | 1.3458 | 0.1359            | 0.6333 | N/A            | 0.0375                                |
| 839           | 2 / F       | 1.5809 | 0.3132                | 0.7618 | 1.2866  | 7.3925  | 1.4940 | 0.1485            | 0.5277 | N/A            | 0.0509                                |
| 840           | 2 / F       | 1.7012 | 0.2856                | 0.7220 | 1.3434  | 6.3157  | 1.6097 | 0.1810            | 0.4710 | N/A            | 0.0101                                |
| 841           | 2 / F       | 1.5624 | 0.2713                | 0.6657 | 1.5467  | 7.9629  | 1.5117 | 0.1857            | 0.6217 | N/A            | 0.0280                                |
| 842           | 2 / F       | 1.6111 | 0.2920                | 0.6753 | 1.4593  | 7.8306  | 1.5704 | 0.1335            | 0.6054 | N/A            | 0.0510                                |
|               | Mean        | 1.5915 | 0.2965                | 0.7068 | 1.3894  | 7.3444  | 1.5063 | 0.1569            | 0.5718 | N/A            | 0.0355                                |
|               | SD          | 0.0731 | 0.0201                | 0.0385 | 0.1100  | 0.6509  | 0.1009 | 0.0248            | 0.0698 | N/A            | 0.0172                                |

## VIII. APPENDICES

## **APPENDIX A – PROTOCOL**

### Final- Study Protocol

#### 14-Day Single Intravenous Dose Toxicity Study of [18F]FP-R01-MG-F2 in Sprague Dawley Rats

**SoBran Study Number: SB-SU-003**

Prepared By

SoBran, Inc.

4000 Blackburn Lane

Suite 100

Burtonsville, MD 20866

Phone: 703-352-9511

September 25, 2014

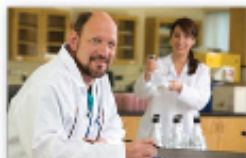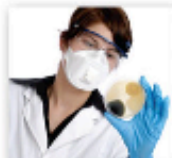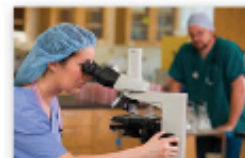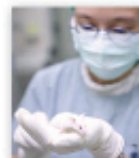

**1. Study Title:**

14-Day Single Intravenous Dose Toxicity Study of [18F]FP-R01-MG-F2 in Sprague Dawley Rats

**2. Study Objectives:**

The goal of this study is to assess the toxicity of [18F]FP-R01-MG-F2 a small molecule (peptide) that is administered with a specific radioactive probe during Positron Emission Tomography (PET) scans to visualize tumors or targeted cells. For this study the toxicity of [18F]FP-R01-MG-F2 (note - small molecule only, no radioactive component) will be assessed following a single intravenous (IV) dose of 1.10 mg/kg (250x the clinical dose) of the test article. The vehicle (10% ethanol in normal saline) will also be tested to establish baseline toxicity.

**3. Regulatory Compliance:**

This study will be performed under GLP conditions, in compliance with the U.S. FDA's GLP regulations for nonclinical laboratory studies, 21CFR part 58.

**4. IACUC Approval:**

The Institutional Animal Care and Use Committee (IACUC) has approved the proposed animal study.

IACUC protocol number: SOB-015-2012  
Approval Date: 08/28/2014 (amendment)  
Expiration Date: 07/05/2015

**5. Test Facility:**

SoBran Rangos Animal Facility  
855 N. Wolfe Street, Suite 622  
Baltimore, Maryland 21205

**Test Sites:****5.1. Clinical Pathology:**

Bioanalytical Systems, Inc. (BASi)  
10424 Middle Mount Vernon Road  
Mount Vernon, IN 47620  
Tel: 812-985-5900

5.2. Histology/Pathology:

Histo-Scientific Research Laboratories (HSRL)  
5930 Main Street  
Mount Jackson, VA 22842  
Tel: 540-477-4440

5.3. Formulation Analysis and Preparation:

SoBran  
855 N. Wolfe Street, Suite 622  
Baltimore, Maryland 21205

Note: Formulation analysis will not be performed as per the client. Only formulation preparation (as described in section 8.4 below) will be performed in the SoBran facility.

6. Study Management:

6.1. Client/Sponsor:

Frederick T. Chin, Ph.D.  
Assistant Professor  
Head, Cyclotron Radiochemistry  
Stanford University School of Medicine  
1201 Welch Road, Rm PS049  
Stanford, CA 94305-5484 USA  
Tel: (650) 725-4182  
Email: chinf@stanford.edu

6.2. SoBran Study Director:

Adrienne Edgell, BS, CMAR, LATG  
Tel: 703-652-9511 x236  
Email: aedgell@sobran-inc.com

6.3. SoBran Study Management:

Greg Kelly, Ph.D.  
Tel: 703-352-9511 ext. 238  
Email: gkelly@sobran-inc.com



### 7. Key Study Dates:

| Study Phase                    | Study Day     | Additional Notes/Proposed Dates                                        |
|--------------------------------|---------------|------------------------------------------------------------------------|
| Study Initiation               | N/A           | Date study director signs protocol                                     |
| Animal Receipt                 | N/A           | Anticipated arrival: 10/2/2014                                         |
| Dosing                         | Day 1         | IV dosed one time; 10/7/2014                                           |
| Blood collection               | Days 3 and 15 | Prior to scheduled necropsy; Day 3 (10/9/2014),<br>Day 15 (10/21/2014) |
| Euthanasia/Necropsy            | Days 3 and 15 | Following blood collection, according to scheduled necropsy            |
| Audited draft report to client | Post-study    | Within 8 weeks of study end                                            |
| Final report signed            | Post-study    | Within 2 weeks of receiving client comments- Marks study completion    |

### 8. Test Compounds and Formulation:

#### 8.1. Test Article:

Name: [18F]FP-R01-MG-F2

Supplier: Sponsor

Lot Number(s): Noted on study forms and in final report

Special Handling: Stored frozen (-20°C ±10°C) prior to formulation (as per sponsor); shipped and received from sponsor at ambient temperature

**Stability & Storage:** Test article will be provided by the sponsor. A Quality Control Record was provided for the lot/batch of test article to be used for this study and specific purity information is known. Test article is considered stable when stored at ambient temperature, but sponsor requested storage under freezing (-20°C ±10°C) conditions following receipt at the testing facility. Following formulation, the prepared test article solution can be stored under room temperature (18-26°C) conditions.

#### 8.2. Vehicle:

Name: 10% Ethanol (USP) in Sterile Saline (0.9% sodium chloride, USP)

Supplier: Commercial vendor/supplier

Lot Number(s): Noted on study forms and in final report

Special Handling: None

**Stability & Storage:** Commercially available ethanol (200 proof, USP grade) will be mixed with sterile saline (0.9% sodium chloride solution, USP) to formulate the 10% ethanol in saline vehicle solution. Certificates of Analysis to be provided in final report to indicate purity and stability of the vehicle formulation components. Vehicle is considered stable when stored under room temperature (18-26°C) conditions.

- 8.3. Vehicle Formulation: Formulations will be prepared on Day 1 of the study, prior to dosing.

**Preparation of Vehicle Solution:**

1. Prepare 150 ml of 10% ethanol in normal saline solution by adding 15 ml of 200 proof ethanol, USP to 135 ml of sterile saline (0.9% sodium chloride solution, USP). Mix gently.
2. Filter solution using a sterile syringe filter.
3. Test pH of the solution with pH paper (pH should be between 7.2 and 7.9).
4. Use small amounts of NaOH or HCl to adjust pH if necessary. Document all chemical details including volume used on the preparation form.
5. Filter solution a second time if pH adjustment was required to ensure sterility.
6. Label flask with appropriate group designation (Group 1 vehicle).

- 8.4. Test Article Formulation: Formulations will be prepared on Day 1 of the study, prior to dosing.

**Preparation of 0.22 mg/ml solution:**

1. Weigh 8.8 mg of test article and transfer to an empty sterile flask.
2. Add 40 ml of 10% ethanol solution (vehicle solution) to the vial containing the test article. Mix gently and verify test article has fully dissolved into solution.
3. Filter solution using a sterile syringe filter.
4. Test pH of the solution with pH paper (pH should be between 7.2 and 7.9).
5. Use small amounts of NaOH or HCl to adjust pH if necessary. Document all chemical details including volume used on the preparation form.
6. Filter solution a second time if pH adjustment was required to ensure sterility.
7. Label with the appropriate group designation (Group 2 high dose).

- 8.5. **Dose Formulation Sampling and Analysis:**

- 8.5.1. Homogeneity: Dose formulations are solutions at the intended concentrations; homogeneity determination is not required.
- 8.5.2. Concentration Analysis: Will not be performed for this study as per the sponsor's request. Appropriate documentation of deviation from requirements will be addressed in the final report.

8.5.3. **Stability:** Will not be performed on individual formulations for this study as per the sponsor's request. Appropriate documentation of deviation from requirements will be addressed in the final report. Stability data is available for the bulk test article and will be included in the final report.

8.6. **Retention/Disposition:** A 1 ml aliquot (or remaining test article if less than 1 ml) of each prepared formulation and the vehicle will be retained and securely stored according to the storage conditions in 8.1 and 8.2 above. Following the in-life study phase, SoBran will contact the sponsor regarding the disposition of the remaining neat test article (if applicable). The remaining neat test article will either be returned to the sponsor, or properly discarded following issuance of the final report if sponsor fails to respond to the disposition request.

**9. Study Details:**

9.1. **Animal Species:** Rat

9.2. **Strain:** Sprague Dawley

9.3. **Sex:** Male and Female

9.4. **Number of animals on study:** 40 (20 ♂, 20 ♀)

9.5. **Age requirements at study start:** 6-8 weeks old, approximately 150-250 grams at study start

9.6. **Supplier:** Harlan

9.7. **Study Summary:** The goal of this study is to assess the toxicity of [18F]FP-R01-MG-F2. For this study the toxicity of [18F]FP-R01-MG-F2 (note - small molecule only, no radioactive component) will be assessed following a single intravenous (IV) dose of 1.10 mg/kg (250x the clinical dose) of the test article. The vehicle (10% ethanol in normal saline) will also be tested to establish baseline toxicity. Half of the animals (20) will be euthanized 3 days following dosing, while the remaining will be euthanized at the end of the study (Day 15). Blood will be collected from all animals on the day of euthanasia, followed by a comprehensive necropsy. Blood and tissues will be evaluated for abnormalities.

9.8. Husbandry Information:

**Housing:** Rats will be housed up to 3 per cage (based on sex/group/scheduled necropsy day) in individually ventilated microisolator cages. Cages are bedded with Harlan Teklad Sani-chips (7090C) bedding and will be changed according to facility standard operating procedures (SOPs). The room environment will be monitored and maintained within a temperature range of 68-79°F and 30-70% humidity. Fluorescent lighting is on an automatic schedule to provide 12 hours of light per day. General procedures for animal care and housing are conducted in accordance with facility SOPs, the *Guide for the Care and Use of Laboratory Animals*, (National Research Council; National Academies Press, Washington, DC, 2011), and the U.S. Department of Agriculture through the Animal Welfare Act (Public Law 99-198).

**Food:** Rats will be offered a commercially available rodent diet (Harlan Teklad Global Rodent Diet 2016C) *ad libitum* (except when fasted overnight prior to blood collection). Analysis of the feed, provided by the manufacturer, will be reviewed by the attending veterinarian or designee, to assure that no known contaminants are present that could interfere with or affect the outcome of the study. Analysis reports are kept on file in the SoBran facility.

**Water:** Rats will have *ad libitum* access to fresh drinking water via the public water system (i.e. tap water). Water will be provided in clean water bottles. Water bottles will be replaced according to facility SOPs. Samples of water from the animal facility are periodically analyzed, and reviewed by the attending veterinarian or designee, to assure that no known contaminants are present that could interfere with or affect the outcome of studies. Analysis reports are kept on file in the SoBran facility.

**Enrichment:** Rats will be provided polycarbonate red tubes as enrichment devices. Enrichment will be changed according to facility SOPs.

9.9. Animal Identification: Animals will be individually identified using stainless steel ear tags with unique test numbers (i.e. 1, 2, 3). Ear tags will be applied at the time of randomization. The number will correspond with the animal's cage card and raw data generated during conduct of the study.

### 10. Experimental Design:

- 10.1. Acclimation: Animals will be allowed to acclimate at least 72 hours prior to use and veterinary release.
- 10.2. Randomization: Following the acclimation period but prior to dosing, all animals will have individual bodyweights collected and documented. General animal health and condition will also be visualized at the time of bodyweight collection. Any abnormalities or signs of poor health will be noted and those animals will be excluded from randomization. Bodyweights will be used to randomize animals (using Excel random number generation) into designated study groups. Animals assigned to each study group (per sex) will be within 20% from the mean group value. Animals outside of this range may be replaced if suitable animals are available or as instructed by the study director. Animal numbers will be assigned to groups in sequential order following randomization.
- 10.3. Group Assignments: Randomized animals will be placed in the following groups:

| Group Number | Dose Level           | Dose Concentration | Dose Volume | Dosing Route | Total # of Animals | Day 3 Cohort | Day 15 Cohort |
|--------------|----------------------|--------------------|-------------|--------------|--------------------|--------------|---------------|
| 1            | 0.00 mg/kg (Vehicle) | 0.00 mg/ml         | 5 ml/kg     | IV           | 10 ♂<br>10 ♀       | 5 ♂<br>5 ♀   | 5 ♂<br>5 ♀    |
| 2            | 1.10 mg/kg           | 0.22 mg/ml         | 5 ml/kg     | IV           | 10 ♂<br>10 ♀       | 5 ♂<br>5 ♀   | 5 ♂<br>5 ♀    |

- 10.4. Dosing Procedures: On Day 1 of the study, animals will be dosed once via IV injection with 5 ml/kg of the designated dose. Bodyweights collected prior to dosing (Day 1 bodyweights) will be used to calculate the individual dose volumes. Animals will be dosed using an appropriate sized needle attached to an appropriate sized syringe. All dosing procedures will be performed as per facility SOPs and documented accordingly.
- 10.5. Observations:  
**Mortality/Cageside:** Animals will be observed once daily (AM) during the acclimation period prior to the study start. Beginning on study Day 1 and over the course of the study, animals will be observed twice daily (AM/PM) for morbidity, mortality, signs of toxicity and overall appearance. Observations and health assessments will be performed according to facility SOPs and will be documented on facility husbandry logs.

**Detailed (hands-on):** Physical hands-on clinical observations will be collected on Study Days 1 (all study animals), Day 2 (Day 3 cohort only; pre-fasting), Day 3 (Day 3 cohort only; post-fasting), Day 8, Day 14 (pre-fasting) and Day 15 (post-fasting). Animals will be palpated and observed for abnormal signs according to facility SOPs. Physical observations will be documented on the appropriate study form.

- 10.6. **Bodyweights:** Animals will have bodyweights collected on Study Days 1 (all study animals), Day 2 (Day 3 cohort only; pre-fasting), Day 3 (Day 3 cohort only; post-fasting), Day 8, Day 14 (pre-fasting) and Day 15 (post-fasting). Individual animal weights and balance calibration information will be documented on the appropriate study form. The Day 1 bodyweights will be used for calculating Day 1 dose volumes.
- 10.7. **Blood Collection:** Blood will be collected from each animal via an approved SOP method for clinical chemistry, hematology, and coagulation factors prior to euthanasia on the scheduled day of necropsy (Day 3 or Day 15). Animals will be food-fasted overnight prior to blood collection (up to 24 hours). Blood will be placed into individually labeled K2 EDTA tubes for hematology, serum separator tubes for clinical chemistry, and sodium citrate tubes for coagulation factors. The date, time, method of collection and type of anesthesia used (if applicable) will be documented on the collection form. Following blood collection, animals will be necropsied (refer to section 10.9 below). All blood samples will be refrigerated between 2-8°C following collection. Hematology (K2 EDTA) samples will be packaged on cold packs/wet ice and sent via overnight courier the same day as collection to the clinical pathology lab for processing. Serum separator and sodium citrate tubes will be centrifuged on the day of collection according to tube manufacturer specifications. Serum tubes will be allowed to clot prior to centrifuging. Serum/plasma will be drawn off and placed into individually labeled vials. Vials will be stored frozen at -20°C ±10°C until shipped on dry ice to the clinical pathology lab for processing. The clinical pathology lab used for this study is:

Bioanalytical Systems, Inc. (BASi)  
Attn: Thea Riggs  
10424 Middle Mount Vernon Road  
Mount Vernon, IN 47620  
Tel: 812-985-3400

The clinical pathology lab will perform the following tests on the blood samples:

#### **Hematology**

- Complete blood Count (CBC)
  - red blood cell (erythrocyte) count
  - hemoglobin
  - hematocrit
  - mean corpuscular volume
  - mean corpuscular hemoglobin
  - mean corpuscular hemoglobin concentration
  - platelet count
  - white blood cell (leukocyte) count
  - differential blood cell count
  - blood smear
  - reticulocyte count

#### **Clinical Chemistry**

- |                         |                             |
|-------------------------|-----------------------------|
| -glucose                | -alanine aminotransferase   |
| -urea nitrogen          | -alkaline phosphatase       |
| -creatinine             | -gamma glutamyltransferase  |
| -total protein          | -aspartate aminotransferase |
| -albumin                | -calcium                    |
| -globulin               | -inorganic phosphorus       |
| -albumin/globulin ratio | -sodium                     |
| -total cholesterol      | -potassium                  |
| -total bilirubin        | -chloride                   |
| -triglycerides          |                             |

#### **Coagulation Factors**

- Prothrombin Time (PT)
- Activated Partial Thromboplastin Time (aPTT)
- Fibrinogen

The clinical pathology lab will provide a report indicating materials, methods and raw data for inclusion in the final study report.

#### 10.8. Euthanasia:

Following blood collection on the scheduled day of necropsy, animals will be euthanized using CO2 overdose, followed by a secondary method (thoracotomy) to ensure death.

Animals exhibiting morbidity/morbundity prior to the schedule day of necropsy may be euthanized with study director approval. The animal will receive a full necropsy with all tissues saved for possible histological evaluation.

If an animal is found dead prior to the scheduled day of necropsy, a full necropsy will be conducted and tissues saved for possible histological evaluation.

#### 10.9. Necropsy:

Following euthanasia, each animal will receive a comprehensive necropsy including organ weights for select tissues. Although only select tissues will be processed for microscopic evaluation, all tissues, including the remaining carcass and ear tag, will be placed in individually labeled containers containing 10% neutral-buffered formalin; with the exception of testis (males) and eyes with optic nerves which will be preserved in modified Davidson's fixative. Testis and eyes with optic nerves will be transferred from modified Davidson's to a suitable fixative (i.e. ethanol or 10% formalin) 1-2 days following the necropsy. The transfer will be documented in the histology records. Containers will be labeled with study number, date, group number, animal number, and Cohort (Day 3 or 15). Refer to the table below for specific tissues evaluated and weighed. Note- all paired organs will be weighed together.

Preserved tissues will be transferred to the processing lab where all tissues listed under "Tissues for Histology" will be embedded in paraffin, prepared to slide, hematoxylin and eosin (H&E) stained, and examined by a Pathologist for test-article related findings. Findings will be reported to the study director who will determine the course of action. All findings will be documented and provided in the pathology report. Tissues from early or unscheduled deaths and tissues not included on the list below will not be processed and examined unless requested by the study director or client.



**Tissues for Histology**

- brain
- cecum
- colon
- eyes with optic nerves (2)
- heart
- ileum
- injection site
- kidneys (2)
- lesions (if present)
- liver
- lungs
- lymph node (mesenteric)
- ovaries (2) (females)
- salivary glands [mandibular (2)]
- spleen
- testes (2) (males)
- thyroid with parathyroid (2)
- trachea
- urinary bladder

**Organ Weights Collected- at time of necropsy**

- brain
- eyes with optic nerves
- heart
- kidneys
- liver
- lung
- ovaries (females)
- spleen
- testes (males)
- thyroid with parathyroid

Necropsy and organ weighing procedures will follow applicable facility SOPs. Note: lungs will be inflated with formalin following organ weight collection. The containers with fixatives and tissues will be stored at room temperature until shipped to following processing lab:

HSRL  
5930 Main Street  
Mount Jackson, VA 22842  
Tel: 540-477-4440

The histology lab will provide a comprehensive report consisting of tabulated microscopic data and a discussion of noteworthy changes for inclusion in the final study report.

**10.10. Animal Disposition:**

Tissues and carcasses of animals are preserved as described above for histological evaluation following necropsy. Animal carcasses not saved (as directed by the study director or client) will be bagged and stored frozen until sent for incineration as medical pathological waste (MPW).

**11. Data Analysis:**

- 11.1. Body Weights and Organ Weights: Comprehensive statistical analysis (mean, standard deviations, N) will be conducted for individual group mean body weight and organ weight data in the final report using one-way Analysis of Variance (ANOVA) and Dunnett's t-test. The probability value of less than 0.05 (two-tailed) will be used as the critical level of significance for all tests.

Details regarding statistical software and additional methods used for bodyweight and organ weight data analysis will be further described in the final report.

- 11.2. Clinical Pathology Data: Statistical analysis of Clinical Pathology data will be conducted according to the following analysis:

A one-way analysis of variance (ANOVA) will be used to analyze the clinical pathology data; if the ANOVA is significant ( $p \leq 0.05$ ), Dunnett's t-test (1955, 1964) will be used for control versus treated group comparisons.

Details regarding statistical software and additional methods used for clinical pathology data analysis will be further described in the final report.

**12. Reports:**

A comprehensive in-life study report will be prepared by SoBran following completion of the study. An audited draft report will be issued to the Sponsor within 8 weeks after completion of the in-life phase. The final report will be issued within 2 weeks after receipt of the Sponsor's review comments on the draft report. At finalization, one bound copy and one electronic copy of the final report will be sent to the Sponsor. SoBran retains the right to finalize the report if comments have not been received from the sponsor within 60 days of issuing the audited draft report.

**13. Raw Data/Archives:**

All raw data generated by the testing facility, any communication regarding the conduct of the study, and a copy of the final report will be stored in SoBran's archive room at our Biomedical Services office in Burtonsville, Maryland for 5 years following the issuance of the final report. Archiving of samples, tissues, blocks, slides, and subcontractor raw data and reports will be noted in the final study report. Residual samples of the test article formulations will be retained by SoBran as described in section 8.6 unless otherwise indicated.

Following the 5-year retention period, the sponsor will be contacted regarding the disposition of the archived documents. If the sponsor fails to respond within 60 days, SoBran reserves the right to destroy all data pertaining to this study.

**14. Quality Assurance Oversight:**

The Quality Assurance Unit (QAU) will periodically audit the study activities conducted within the test facility in accordance with the study protocol, facility SOPs and applicable GLP regulations. Study activities conducted outside of the test facility (i.e. subcontractors) will be audited accordingly by their QAUs with applicable reports submitted to the SoBran study director. A Quality Assurance Unit (QAU) review will be provided for the draft and final reports according to facility SOPs and GLPs.

**15. Protocol Amendments and Deviations:**

15.1. Amendments: All revisions to the approved protocol will be documented as protocol amendments. All amendments will be signed and dated by the study director, study management and client/sponsor. Amendments will be maintained with the protocol. Written approval (i.e. an email directive from the study director approving the amendment) may be used to initiate the protocol change, but will be followed by an official signed amendment.

15.2. Deviations: All activities pertaining to this study, unless specifically defined in this protocol, will be performed according to SoBran SOPs. All deviations from the signed protocol, amendments, or SOPs will be documented in the study raw data and final report.

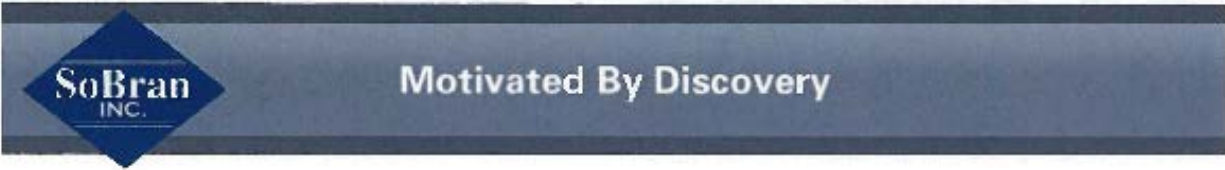

**16. Protocol Approval:**

This protocol has been reviewed and approved.

Sponsor:  Date: 09/25/2014  
Frederick Chin, Ph.D.

SoBran Study Director:  Date: 9/26/14  
Adrienne Edgell, BS, CMAR, LATG

SoBran Study Management:  Date: 9/22/14  
Greg Kelly, Ph.D.

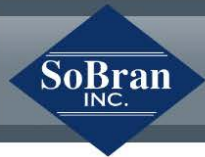

## Motivated By Discovery

Protocol Amendment  
Amendment: 114-Day Single Intravenous Dose Toxicity Study of  
[<sup>19</sup>F]FP-R<sub>0</sub>1-MG-F2 in Sprague Dawley Rats

- 1) **Section Amended:** Title Page and Study Title; Section 1, Pages 1-2

**Change as follows:**

Title was replaced with the following:

*14-Day Single Intravenous Dose Toxicity Study of [<sup>19</sup>F]FP-R<sub>0</sub>1-MG-F2 in Sprague Dawley Rats*

**Justification:** The actual test material contained [<sup>19</sup>F] in place of the [<sup>18</sup>F] radioactive component. Also the "zero" should be subscript to reflect the appropriate compound name.

- 2) **Section Amended:** Study Objectives; Section 2, Page 2

**Change as follows:**

*The goal of this study is to assess the toxicity of [<sup>19</sup>F]FP-R<sub>0</sub>1-MG-F2 a small molecule (peptide) that is administered with a specific radioactive probe during Positron Emission Tomography (PET) scans to visualize tumors or targeted cells. For this study the toxicity of [<sup>19</sup>F]FP-R<sub>0</sub>1-MG-F2 (note - small molecule only, [<sup>19</sup>F] is in place of the [<sup>18</sup>F] radioactive component which will be used clinically) will be assessed following a single intravenous (IV) dose of 1.10 mg/kg (250x the clinical dose) of the test article. The vehicle (10% ethanol in normal saline) will also be tested to establish baseline toxicity.*

**Justification:** The actual test material contained [<sup>19</sup>F] in place of the [<sup>18</sup>F] radioactive component. Also the "zero" should be subscript to reflect the appropriate compound name.

- 3) **Section Amended:** Test Article; Section 8.1, Page 4

**Change as follows:**

Name: [<sup>19</sup>F]FP-R<sub>0</sub>1-MG-F2

Supplier: Sponsor

Lot Number(s): Noted on study forms and in final report

Special Handling: Stored frozen (-20°C ±10°C) prior to formulation (as per sponsor); shipped and received from sponsor at ambient temperature

**Justification:** The actual test material contained [<sup>19</sup>F] in place of the [<sup>18</sup>F] radioactive component. Also the "zero" should be subscript to reflect the appropriate compound name.

- 4) **Section Amended:** Study Summary; Section 9.7, Page 6

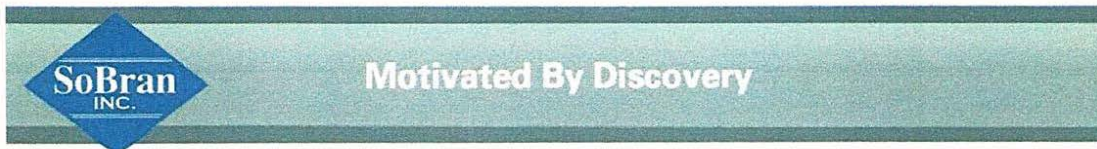

**Change as follows:**

The goal of this study is to assess the toxicity of [<sup>18</sup>F]FP-R<sub>0</sub>1-MG-F2. For this study the toxicity of [<sup>19</sup>F]FP-R<sub>0</sub>1-MG-F2 (note - small molecule only, [<sup>19</sup>F] is in place of [<sup>18</sup>F] radioactive component) will be assessed following a single intravenous (IV) dose of 1.10 mg/kg (250x the clinical dose) of the test article. The vehicle (10% ethanol in normal saline) will also be tested to establish baseline toxicity. Half of the animals (20) will be euthanized 3 days following dosing, while the remaining will be euthanized at the end of the study (Day 15). Blood will be collected from all animals on the day of euthanasia, followed by a comprehensive necropsy. Blood and tissues will be evaluated for abnormalities.

**Justification:** The actual test material contained [<sup>18</sup>F] in place of the [<sup>19</sup>F] radioactive component. Also the "zero" should be subscript to reflect the appropriate compound name.

**Amendment Approval**

Sponsor:  Date: 01/07/2015  
Frederick Chin, Ph.D.

SoBran Study Director:  Date: 2/2/15  
Adrienne Edgell, BS, CMAR, LATG

SoBran Study Management: **Gregory Kelly**  
**Ph.D.** Digitally signed by Gregory Kelly Ph.D.  
DN: cn=Gregory Kelly Ph.D., o=SoBran  
Inc., ou, email=gkelly@sobran-inc.com,  
c=US  
Date: 2015.01.07 14:36:05 -05'00'  
Greg Kelly, Ph.D.

## **APPENDIX B – CLINICAL PATHOLOGY REPORT**

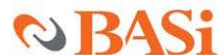

**AMENDED FINAL REPORT**

**CLINICAL PATHOLOGY EVALUATION FOR 14-DAY SINGLE  
INTRAVENOUS DOSE TOXICITY STUDY OF [<sup>19</sup>F]FP-R<sub>0</sub>1-MG-F2 IN  
SPRAGUE DAWLEY RATS**

**TEST SITE**

BASi  
10424 Middle Mt. Vernon Road  
Mt. Vernon, IN 47620

**BASI PROJECT NUMBER**

1327-14292

**SOBRAN STUDY NUMBER**

SB-SU-003

**SPONSOR**

Stanford University School of Medicine  
1201 Welch Road, Room PS049  
Stanford, CA 94305-5484

**PRINCIPAL INVESTIGATOR**

T.A. Riggs AS, MLT (ASCP)

Report Completion: 24 November 2014  
Report Amendment #1 Completion: 04 February 2015



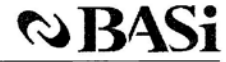

BASi Project Number: 1327-14292 (SB-SU-003)

**SIGNATURES**

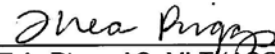

T.A. Riggs AS, MLT (ASCP)  
Clinical Pathology Coordinator  
BASi

24 Nov 14

Date



P. A. Downing, BA  
Sr. Director, Preclinical Services  
BASi

24 Nov 14

Date

BASi Project Number: 1327-14292 (SB-SU-003)

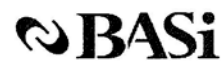

**STATEMENT OF REGULATORY COMPLIANCE**

The nonclinical study described in this report was conducted in accordance with The United States Food and Drug Administration (US FDA) Good Laboratory Practice Regulations for Nonclinical Laboratory Studies (GLPs), 21 Code of Federal Regulations (CFR), Part 58.

This report accurately reflects the experimental data. No events occurred that were considered to have influenced the quality or integrity of the study.

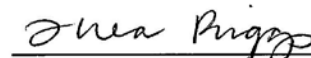  
\_\_\_\_\_  
T.A. Riggs AS, MLT (ASCP)  
Clinical Pathology Coordinator  
BASi

24 Nov 14  
Date

BASi Project Number: 1327-14292 (SB-SU-003)

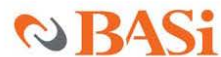

**QUALITY ASSURANCE STATEMENT**

Study Title            Clinical Pathology Evaluation for 14-Day Single Intravenous  
Dose Toxicity Study of [<sup>19</sup>F]FP-R<sub>0</sub>1-MG-F2 in Sprague Dawley  
Rats

BASi Project No.    1327-14292

In accordance with BASi policy and quality assurance procedures for Good Laboratory Practice (GLP), this project has been audited and the conduct of this study has been inspected as follows:

| <b>Date of Inspection</b> | <b>Inspection</b>                                              | <b>Date Reported to Study Director &amp; Management</b> |
|---------------------------|----------------------------------------------------------------|---------------------------------------------------------|
| 10 October 2014           | Sample Receipt; Hematology Evaluation; Wedge Smear Preparation | 10 October 2014                                         |
| 18 November 2014          | Data; Draft under Circulation for Review and Comment           | 19 November 2014                                        |
| 24 November 2014          | Final Report                                                   | 24 November 2014                                        |

**Quality Assurance Unit**

Sandra J. Fox, BS, RQAP-GLP  
Quality Assurance Manager  
BASi

\_\_\_\_\_  
Signature Date

BASi Project Number: 1327-14292 (SB-SU-003)

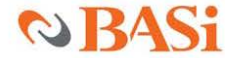

## TABLE OF CONTENTS

|                                                    |     |
|----------------------------------------------------|-----|
| Signatures.....                                    | i   |
| Statement of Regulatory Compliance .....           | ii  |
| Quality Assurance Statement .....                  | iii |
| Table of Contents .....                            | iv  |
| 1. Test Site.....                                  | 1   |
| 2. Principal Investigator.....                     | 1   |
| 3. Personnel.....                                  | 1   |
| 4. Study Design .....                              | 1   |
| 5. Blood Sample Collection and Storage .....       | 2   |
| 5.1. Hematology.....                               | 2   |
| 5.2. Coagulation.....                              | 3   |
| 5.3. Clinical Chemistry .....                      | 3   |
| 6. Data Acquisition and Statistical Analysis ..... | 3   |
| 6.1. Data Acquisition.....                         | 3   |
| 6.2. Statistical Analysis .....                    | 3   |
| 7. Data and Specimen Retention .....               | 3   |
| 8. References .....                                | 4   |

### Tables:

- 1 - Summary of Hematology and Coagulation
- 2 - Summary of Clinical Chemistry

### Appendices:

- 1 - Individual Hematology and Coagulation
- 2 - Individual Clinical Chemistry
- 3 - Report Amendment

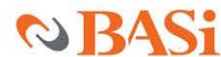

BASi Project Number: 1327-14292 (SB-SU-003)

**Clinical Pathology Evaluation for 14-Day Single Intravenous Dose Toxicity Study of [<sup>19</sup>F]FP-R<sub>0</sub>1-MG-F2 in Sprague Dawley Rats**

**1. TEST SITE**

BASi  
10424 Middle Mt. Vernon Road  
Mt. Vernon, IN 47620 USA

**2. PRINCIPAL INVESTIGATOR**

T.A. Riggs AS, MLT (ASCP)  
BASi  
Phone: 812.985.5900 ext. 1122  
Fax: 812.985.3403  
Email: [tariggs@basinc.com](mailto:tariggs@basinc.com)

**3. PERSONNEL**

Sr. Director, Preclinical Services  
P. A. Downing, BA  
  
Director of Toxicology  
L.D. Hopper, DVM, PhD, DABT, RQAP-GLP  
  
Clinical Pathology Coordinator  
T.A. Riggs AS, MLT (ASCP)  
  
Quality Assurance Manager  
S. J. Fox, BS, RQAP-GLP

**4. STUDY DESIGN**

The goal of this study was to assess the toxicity of [<sup>19</sup>F]FP-R<sub>0</sub>1-MG-F2 a small molecule (peptide) that is administered with a specific radioactive probe during Positron Emission Tomography (PET) scans to visualize tumors or targeted cells. For this study the toxicity of [<sup>19</sup>F]FP-R<sub>0</sub>1-MG-F2 (note - small molecule only, no radioactive component) was assessed following a single intravenous (IV) dose of 1.10 mg/kg (250x the clinical dose) of the test article. The vehicle (10% ethanol in normal saline) was also tested to establish baseline toxicity.

Randomized animals were placed in the following groups:

| Group Number | Dose Level           | Dose Concentration | Dose Volume | Dosing Route | Total # of Animals | Day 3 Cohort | Day 15 Cohort |
|--------------|----------------------|--------------------|-------------|--------------|--------------------|--------------|---------------|
| 1            | 0.00 mg/kg (Vehicle) | 0.00 mg/ml         | 5 ml/kg     | IV           | 10M<br>10F         | 5M<br>5F     | 5M<br>5F      |
| 2            | 1.10 mg/kg           | 0.22 mg/ml         | 5 ml/kg     | IV           | 10M<br>10F         | 5M<br>5F     | 5M<br>5F      |

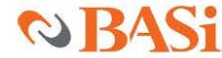

BASi Project Number: 1327-14292 (SB-SU-003)

## 5. BLOOD SAMPLE COLLECTION AND STORAGE

Blood samples were collected at SoBran.

Hematology samples were shipped on frozen ice packs or wet ice on the days of collection (Day 3: 09 October 2014 and Day 15: 21 October 2014) via overnight delivery to BASi. Upon arrival at BASi on 10 October 2014 and 22 October 2014, samples were inventoried and analyzed. Slides were prepared for all animals on the days of sample receipt. Specimens that were flagged by the analyzer for RBCs or platelets were reviewed for RBC and platelet morphology on 10 October 2014 (Day 3) and 23 October 2014 (Day 15). After analysis, samples were refrigerated until disposal.

Coagulation samples were shipped on dry ice on the final day of collection (Day 15: 21 October 2014, Day 3: 09 October 2014 included) via overnight delivery to BASi. Upon arrival at BASi, samples were inventoried, frozen at  $\leq -70^{\circ}\text{C}$ , and analyzed on 23 October 2014 (Day 3) and 24 October 2014 (Day 15). After analysis, samples were discarded.

Clinical chemistry samples were shipped on dry ice on the final day of collection (Day 15: 21 October 2014, Day 3: 09 October 2014 included) via overnight delivery to BASi. Upon arrival at BASi, samples were inventoried, frozen at  $\leq -20^{\circ}\text{C}$ , and analyzed on 30 October 2014. After analysis, samples were frozen at  $\leq -20^{\circ}\text{C}$  until disposal.

All hematology samples collected exceeded the BASi established 24-hour stability for analysis. Review of manufacturer recommendation confirmed that samples are stable for longer than 24 hours with the exception of MCV, which may be effected by a longer storage time.

Coagulation sample quantities were not sufficient for fibrinogen analysis.

### 5.1. Hematology

Whole blood (approximately 0.50 mL) was collected in EDTA anticoagulant tubes from all surviving animals at scheduled euthanasia (Day 3 and Day 15) for determination of the following hematology parameters:

|                                    |                                           |
|------------------------------------|-------------------------------------------|
| White blood cell (leukocyte) count | Mean corpuscular volume                   |
| Differential blood cell count      | Mean corpuscular hemoglobin               |
| Red blood cell (erythrocyte) count | Hemoglobin                                |
| Platelet count                     | Hematocrit                                |
| Blood smear                        | Mean corpuscular hemoglobin concentration |
| Reticulocyte Count                 |                                           |

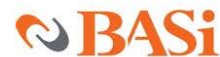

BASi Project Number: 1327-14292 (SB-SU-003)

## 5.2. Coagulation

Whole blood (approximately 0.70 mL) was collected in sodium citrate anticoagulant tubes from all surviving animals at scheduled euthanasia (Day 3 and Day 15) for determination of the following coagulation parameters:

|                  |                                       |
|------------------|---------------------------------------|
| Prothrombin time | Activated partial thromboplastin time |
|------------------|---------------------------------------|

## 5.3. Clinical Chemistry

Whole blood (approximately 0.50 mL) was collected from all surviving animals at scheduled euthanasia (Day 3 and Day 15) and processed to serum for determination of the following clinical chemistry parameters:

|                            |                                     |
|----------------------------|-------------------------------------|
| Sodium                     | Total cholesterol                   |
| Potassium                  | Triglycerides                       |
| Chloride                   | Total protein                       |
| Alkaline phosphatase       | Albumin                             |
| Alanine aminotransferase   | Globulin (calculated)               |
| Aspartate aminotransferase | Albumin/globulin ratio (calculated) |
| Glucose                    | Calcium                             |
| Blood urea nitrogen        | Inorganic phosphorus                |
| Creatinine                 | Total bilirubin                     |
| Gamma glutamyltransferase  |                                     |

## 6. DATA ACQUISITION AND STATISTICAL ANALYSIS

### 6.1. Data Acquisition

Clinical pathology data were collected on the ADVIA120, ADVIA1800, and Diagnostica STAGO Coagulation Analyzer and key-punched into Paradox for reporting and statistical analysis.

### 6.2. Statistical Analysis

Statistical analysis of clinical pathology data was conducted according to the following analysis:

A one-way analysis of variance (ANOVA) was used to analyze the clinical pathology data; if the ANOVA was significant ( $p \leq 0.05$ ), Dunnett's t-test (1955, 1964) was used for control versus treated group comparisons.

## 7. DATA AND SPECIMEN RETENTION

All original raw data, documentation, and the original final report originating from this test site will be retained at BASi or an approved archive facility for a period of two years following completion of the study (final report issue date). After the two-year retention period, study materials will be transferred to

BASi Project Number: 1327-14292 (SB-SU-003)

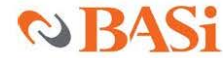

SoBran or SoBran's designated archive facility, or may be retained at BASi based on a contractual agreement between SoBran and BASi.

All slides from this study may be stored at BASi for a period of four months following completion of the BASi report. After the four-month retention period, the slides may be transferred to SoBran or SoBran's designated archive facility, or may be retained at BASi based on a contractual agreement between SoBran and BASi.

All time-sensitive biological specimens from this study were discarded following analysis.

## 8. REFERENCES

Dunnett CW. New tables for multiple comparisons with a control. *Biometrics* 1964; 20:482-92.

Dunnett CW. A multiple comparison procedure for comparing several treatments with a control. *J Amer Statis Assoc* 1955; 50:1096-121.



BASi Project Number: 1327-14292 (SB-SU-003)

---

## TABLES

BASi Project Number: 1327-14292 (SB-SU-003)

**TABLE 1**  
**Key to Summary of Hematology and Coagulation**

**Dosage Key**

| Group Number | Dose Level           | Dose Conc. | Dose Volume | Dosing Route | Total # of Animals | Day 3 Cohort | Day 15 Cohort |
|--------------|----------------------|------------|-------------|--------------|--------------------|--------------|---------------|
| 1            | 0.00 mg/kg (vehicle) | 0.00 mg/ml | 5 ml/kg     | IV           | 10M<br>10F         | 5M<br>5F     | 5M<br>5F      |
| 2            | 1.10 mg/kg           | 0.22 mg/ml | 5 ml/kg     | IV           | 10M<br>10F         | 5M<br>5F     | 5M<br>5F      |

**Abbreviations**

|       |                                           |                                  |
|-------|-------------------------------------------|----------------------------------|
| WBC   | White blood cell count                    | x 10 <sup>3</sup> cells/ $\mu$ L |
| ANE   | Absolute neutrophil count                 | x 10 <sup>3</sup> cells/ $\mu$ L |
| ALY   | Absolute lymphocyte count                 | x 10 <sup>3</sup> cells/ $\mu$ L |
| AMO   | Absolute monocyte count                   | x 10 <sup>3</sup> cells/ $\mu$ L |
| AEO   | Absolute eosinophil count                 | x 10 <sup>3</sup> cells/ $\mu$ L |
| ABA   | Absolute basophil count                   | x 10 <sup>3</sup> cells/ $\mu$ L |
| ALUC  | Absolute large unstained cell count       | x 10 <sup>3</sup> cells/ $\mu$ L |
| RBC   | Red blood cell count                      | x 10 <sup>6</sup> cells/ $\mu$ L |
| HB    | Hemoglobin                                | g/dL                             |
| HCT   | Hematocrit                                | Percent                          |
| MCV   | Mean corpuscular volume                   | fL                               |
| MCH   | Mean corpuscular hemoglobin               | pg                               |
| MCHC  | Mean corpuscular hemoglobin concentration | g/dL                             |
| PLT   | Platelet count                            | x 10 <sup>3</sup> cells/ $\mu$ L |
| Retic | Reticulocyte count                        | Percent                          |
| PT    | Prothrombin time                          | Seconds                          |
| APTT  | Activated partial thromboplastin time     | Seconds                          |
| FIB   | Fibrinogen                                | mg/dL                            |

**Dunnett's Test Key**

- \* = .05 Significance by Dunnett's Test
- + = .01 Significance by Dunnett's Test
- < = Less than 5 degrees of freedom by Dunnett's Test
- Ç = Control group used for Dunnett's Test comparison

BASi Project Number: 1327-14292 (SB-SU-003)
 

---

**TABLE 1**  
**Summary of Hematology and Coagulation**  
**Males**

| Group Number |    |     | WBC    | WBC    | ANE   | ANE    | ALY    | ALY    |
|--------------|----|-----|--------|--------|-------|--------|--------|--------|
|              |    |     | Day 3  | Day 15 | Day 3 | Day 15 | Day 3  | Day 15 |
| Ç            | 1M | Mn: | 10.15  | 12.50  | 1.73  | 1.93   | 7.88   | 9.94   |
|              |    | SD: | 2.19   | 1.14   | .31   | .38    | 1.91   | 1.14   |
|              |    | N:  | 5      | 5      | 5     | 5      | 5      | 5      |
|              | 2M | Mn: | 13.10* | 11.31  | 1.80  | 1.48   | 10.47* | 9.33   |
|              |    | SD: | 1.61   | 1.29   | .35   | .34    | 1.31   | .90    |
|              |    | N:  | 5      | 5      | 5     | 5      | 5      | 5      |

| Group Number |    |     | AMO   | AMO    | AEO   | AEO    | ABA   | ABA    |
|--------------|----|-----|-------|--------|-------|--------|-------|--------|
|              |    |     | Day 3 | Day 15 | Day 3 | Day 15 | Day 3 | Day 15 |
| Ç            | 1M | Mn: | .33   | .42    | .10   | .07    | .04   | .07    |
|              |    | SD: | .09   | .10    | .06   | .01    | .02   | .03    |
|              |    | N:  | 5     | 5      | 5     | 5      | 5     | 5      |
|              | 2M | Mn: | .58+  | .29    | .08   | .07    | .06   | .06    |
|              |    | SD: | .08   | .10    | .03   | .02    | .02   | .02    |
|              |    | N:  | 5     | 5      | 5     | 5      | 5     | 5      |

| Group Number |    |     | ALUC  | ALUC   | RBC   | RBC    | HB    | HB     |
|--------------|----|-----|-------|--------|-------|--------|-------|--------|
|              |    |     | Day 3 | Day 15 | Day 3 | Day 15 | Day 3 | Day 15 |
| Ç            | 1M | Mn: | .07   | .09    | 7.24  | 8.17   | 14.3  | 15.4   |
|              |    | SD: | .02   | .01    | .67   | .11    | 1.5   | .4     |
|              |    | N:  | 5     | 5      | 5     | 5      | 5     | 5      |
|              | 2M | Mn: | .11+  | .08    | 7.53  | 8.05   | 14.6  | 15.6   |
|              |    | SD: | .02   | .02    | .16   | .14    | .4    | .2     |
|              |    | N:  | 5     | 5      | 5     | 5      | 5     | 5      |

BASi Project Number: 1327-14292 (SB-SU-003)
 

---

**TABLE 1**  
**Summary of Hematology and Coagulation**  
**Males**

| Group Number |    |     | HCT   | HCT    | MCV   | MCV    | MCH   | MCH    |
|--------------|----|-----|-------|--------|-------|--------|-------|--------|
|              |    |     | Day 3 | Day 15 | Day 3 | Day 15 | Day 3 | Day 15 |
| ♀            | 1M | Mn: | 44.6  | 46.8   | 61.6  | 57.3   | 19.7  | 18.8   |
|              |    | SD: | 4.6   | .8     | 1.4   | .8     | .4    | .3     |
|              |    | N:  | 5     | 5      | 5     | 5      | 5     | 5      |
| ♀            | 2M | Mn: | 45.8  | 47.0   | 60.9  | 58.4   | 19.4  | 19.3*  |
|              |    | SD: | 1.6   | .8     | 2.1   | 1.1    | .6    | .3     |
|              |    | N:  | 5     | 5      | 5     | 5      | 5     | 5      |

| Group Number |    |     | MCHC  | MCHC   | PLT   | PLT    | Retic | Retic  |
|--------------|----|-----|-------|--------|-------|--------|-------|--------|
|              |    |     | Day 3 | Day 15 | Day 3 | Day 15 | Day 3 | Day 15 |
| ♀            | 1M | Mn: | 31.9  | 32.9   | 1294  | 1142   | 5.66  | 4.25   |
|              |    | SD: | .3    | .4     | 68    | 134    | .71   | .37    |
|              |    | N:  | 5     | 5      | 5     | 5      | 5     | 5      |
| ♀            | 2M | Mn: | 31.9  | 33.0   | 1350  | 1145   | 6.24  | 4.41   |
|              |    | SD: | .4    | .2     | 319   | 89     | 2.23  | .43    |
|              |    | N:  | 5     | 5      | 5     | 5      | 5     | 5      |

| Group Number |    |     | PT    | PT     | APTT  | APTT   | FIB   | FIB    |
|--------------|----|-----|-------|--------|-------|--------|-------|--------|
|              |    |     | Day 3 | Day 15 | Day 3 | Day 15 | Day 3 | Day 15 |
| ♀            | 1M | Mn: | 17.1  | 15.8   | 20.0  | 21.0   | -     | -      |
|              |    | SD: | 1.6   | .8     | 2.6   | 10.9   | -     | -      |
|              |    | N:  | 4     | 5      | 5     | 5      | 0     | 0      |
| ♀            | 2M | Mn: | 17.8  | 15.5   | 21.8  | 24.5   | -     | -      |
|              |    | SD: | .8    | .7     | 6.0   | 12.1   | -     | -      |
|              |    | N:  | 4     | 5      | 3     | 5      | 0     | 0      |

BASi Project Number: 1327-14292 (SB-SU-003)
 

---

**TABLE 1**  
**Summary of Hematology and Coagulation**  
**Females**

| Group Number |    |     | WBC   | WBC    | ANE   | ANE    | ALY   | ALY    |
|--------------|----|-----|-------|--------|-------|--------|-------|--------|
|              |    |     | Day 3 | Day 15 | Day 3 | Day 15 | Day 3 | Day 15 |
| Ç            | 1F | Mn: | 6.44  | 9.11   | 1.14  | 1.76   | 5.02  | 6.96   |
|              |    | SD: | .65   | 1.89   | .45   | .52    | .69   | 1.45   |
|              |    | N:  | 5     | 5      | 5     | 5      | 5     | 5      |
|              | 2F | Mn: | 6.56  | 8.43   | .80   | 1.14   | 5.48  | 6.95   |
|              |    | SD: | 1.72  | 1.50   | .39   | .33    | 1.50  | 1.14   |
|              |    | N:  | 5     | 5      | 5     | 5      | 5     | 5      |

| Group Number |    |     | AMO   | AMO    | AEO   | AEO    | ABA   | ABA    |
|--------------|----|-----|-------|--------|-------|--------|-------|--------|
|              |    |     | Day 3 | Day 15 | Day 3 | Day 15 | Day 3 | Day 15 |
| Ç            | 1F | Mn: | .14   | .16    | .08   | .14    | .02   | .04    |
|              |    | SD: | .04   | .04    | .02   | .05    | .02   | .02    |
|              |    | N:  | 5     | 5      | 5     | 5      | 5     | 5      |
|              | 2F | Mn: | .11   | .14    | .07   | .12    | .05   | .04    |
|              |    | SD: | .03   | .06    | .03   | .04    | .03   | .01    |
|              |    | N:  | 5     | 5      | 5     | 5      | 5     | 5      |

| Group Number |    |     | ALUC  | ALUC   | RBC   | RBC    | HB    | HB     |
|--------------|----|-----|-------|--------|-------|--------|-------|--------|
|              |    |     | Day 3 | Day 15 | Day 3 | Day 15 | Day 3 | Day 15 |
| Ç            | 1F | Mn: | .04   | .05    | 7.49  | 7.74   | 14.6  | 14.9   |
|              |    | SD: | .02   | .01    | .13   | .14    | .3    | .3     |
|              |    | N:  | 5     | 5      | 5     | 5      | 5     | 5      |
|              | 2F | Mn: | .04   | .05    | 7.35  | 7.74   | 14.3  | 15.0   |
|              |    | SD: | .01   | .02    | .35   | .09    | .6    | .3     |
|              |    | N:  | 5     | 5      | 5     | 5      | 5     | 5      |

BASi Project Number: 1327-14292 (SB-SU-003)
 

---

**TABLE 1**  
**Summary of Hematology and Coagulation**  
**Females**

| Group Number |    |     | HCT   | HCT    | MCV   | MCV    | MCH   | MCH    |
|--------------|----|-----|-------|--------|-------|--------|-------|--------|
|              |    |     | Day 3 | Day 15 | Day 3 | Day 15 | Day 3 | Day 15 |
| ♀            | 1F | Mn: | 44.0  | 43.8   | 58.8  | 56.5   | 19.5  | 19.3   |
|              |    | SD: | 1.2   | .5     | .8    | .6     | .2    | .3     |
|              |    | N:  | 5     | 5      | 5     | 5      | 5     | 5      |
| ♀            | 2F | Mn: | 43.4  | 44.1   | 59.1  | 56.9   | 19.5  | 19.3   |
|              |    | SD: | 1.6   | .7     | 1.0   | .8     | .4    | .3     |
|              |    | N:  | 5     | 5      | 5     | 5      | 5     | 5      |

| Group Number |    |     | MCHC  | MCHC   | PLT   | PLT    | Retic | Retic  |
|--------------|----|-----|-------|--------|-------|--------|-------|--------|
|              |    |     | Day 3 | Day 15 | Day 3 | Day 15 | Day 3 | Day 15 |
| ♀            | 1F | Mn: | 33.1  | 34.1   | 1411  | 1169   | 3.34  | 2.89   |
|              |    | SD: | .5    | .4     | 154   | 124    | .60   | .93    |
|              |    | N:  | 5     | 5      | 5     | 5      | 5     | 5      |
| ♀            | 2F | Mn: | 32.9  | 33.9   | 1416  | 1175   | 4.01  | 3.13   |
|              |    | SD: | .8    | .3     | 152   | 103    | .90   | .60    |
|              |    | N:  | 5     | 5      | 5     | 5      | 5     | 5      |

| Group Number |    |     | PT    | PT     | APTT  | APTT   | FIB   | FIB    |
|--------------|----|-----|-------|--------|-------|--------|-------|--------|
|              |    |     | Day 3 | Day 15 | Day 3 | Day 15 | Day 3 | Day 15 |
| ♀            | 1F | Mn: | 16.8  | 16.3   | 27.4  | 18.8   | -     | -      |
|              |    | SD: | .9    | 1.3    | .0    | 2.9    | -     | -      |
|              |    | N:  | 5     | 4      | 1     | 4      | 0     | 0      |
| ♀            | 2F | Mn: | 16.5  | 15.7   | 20.8< | 14.1*  | -     | -      |
|              |    | SD: | .6    | 1.3    | 3.5   | .9     | -     | -      |
|              |    | N:  | 3     | 5      | 3     | 4      | 0     | 0      |

BASi Project Number: 1327-14292 (SB-SU-003)
 

---

**TABLE 2**  
**Key to Summary of Clinical Chemistry**

**Dosage Key**

| <b>Group Number</b> | <b>Dose Level</b>       | <b>Dose Conc.</b> | <b>Dose Volume</b> | <b>Dosing Route</b> | <b>Total # of Animals</b> | <b>Day 3 Cohort</b> | <b>Day 15 Cohort</b> |
|---------------------|-------------------------|-------------------|--------------------|---------------------|---------------------------|---------------------|----------------------|
| 1                   | 0.00 mg/kg<br>(vehicle) | 0.00 mg/ml        | 5 ml/kg            | IV                  | 10M<br>10F                | 5M<br>5F            | 5M<br>5F             |
| 2                   | 1.10 mg/kg              | 0.22 mg/ml        | 5 ml/kg            | IV                  | 10M<br>10F                | 5M<br>5F            | 5M<br>5F             |

**Abbreviations**

|      |                                     |       |
|------|-------------------------------------|-------|
| NA   | Sodium                              | mEq/L |
| K    | Potassium                           | mEq/L |
| CL   | Chloride                            | mEq/L |
| ALB  | Albumin                             | g/dL  |
| ALP  | Alkaline phosphatase                | U/L   |
| ALT  | Alanine aminotransferase            | U/L   |
| AST  | Aspartate aminotransferase          | U/L   |
| BUN  | Blood urea nitrogen                 | mg/dL |
| CA   | Calcium                             | mg/dL |
| CHOL | Total cholesterol                   | mg/dL |
| CRE  | Creatinine                          | mg/dL |
| GGT  | Gamma Glutamyltransferase           | U/L   |
| GLU  | Glucose                             | mg/dL |
| PHOS | Inorganic phosphorus                | mg/dL |
| TBIL | Total bilirubin                     | mg/dL |
| TP   | Total protein                       | g/dL  |
| TRIG | Triglycerides                       | mg/dL |
| GLOB | Globulin (calculated)               | g/dL  |
| A/G  | Albumin/globulin ratio (calculated) | --    |

**Dunnett's Test Key**

- \* = .05 Significance by Dunnett's Test
- + = .01 Significance by Dunnett's Test
- < = Less than 5 degrees of freedom by Dunnett's Test
- Ç = Control group used for Dunnett's Test comparison

BASi Project Number: 1327-14292 (SB-SU-003)
 

---

**TABLE 2**  
**Summary of Clinical Chemistry**  
**Males**

| Group Number |    |     | NA    | NA     | K     | K      | CL    | CL     |
|--------------|----|-----|-------|--------|-------|--------|-------|--------|
|              |    |     | Day 3 | Day 15 | Day 3 | Day 15 | Day 3 | Day 15 |
| Ç            | 1M | Mn: | 143   | 142    | 5.1   | 5.1    | 102   | 103    |
|              |    | SD: | 1     | 1      | .3    | .2     | 1     | 1      |
|              |    | N:  | 5     | 5      | 5     | 5      | 5     | 5      |
|              | 2M | Mn: | 142   | 142    | 5.4   | 4.9    | 102   | 102    |
|              |    | SD: | 2     | 0      | .2    | .3     | 1     | 1      |
|              |    | N:  | 5     | 5      | 5     | 5      | 5     | 5      |

  

| Group Number |    |     | ALB   | ALB    | ALP   | ALP    | ALT   | ALT    |
|--------------|----|-----|-------|--------|-------|--------|-------|--------|
|              |    |     | Day 3 | Day 15 | Day 3 | Day 15 | Day 3 | Day 15 |
| Ç            | 1M | Mn: | 3.5   | 3.8    | 235   | 190    | 64    | 68     |
|              |    | SD: | .3    | .1     | 19    | 21     | 6     | 4      |
|              |    | N:  | 5     | 5      | 5     | 5      | 5     | 5      |
|              | 2M | Mn: | 3.6   | 3.8    | 252   | 247*   | 77+   | 80*    |
|              |    | SD: | .1    | .1     | 9     | 36     | 6     | 9      |
|              |    | N:  | 5     | 5      | 5     | 5      | 5     | 5      |

  

| Group Number |    |     | AST   | AST    | BUN   | BUN    | CA    | CA     |
|--------------|----|-----|-------|--------|-------|--------|-------|--------|
|              |    |     | Day 3 | Day 15 | Day 3 | Day 15 | Day 3 | Day 15 |
| Ç            | 1M | Mn: | 125   | 107    | 16    | 17     | 9.9   | 9.9    |
|              |    | SD: | 16    | 7      | 5     | 2      | .3    | .1     |
|              |    | N:  | 5     | 5      | 5     | 5      | 5     | 5      |
|              | 2M | Mn: | 115   | 111    | 15    | 20     | 10.0  | 9.9    |
|              |    | SD: | 10    | 9      | 2     | 3      | .3    | .1     |
|              |    | N:  | 5     | 5      | 5     | 5      | 5     | 5      |



BASi Project Number: 1327-14292 (SB-SU-003)
 

---

**TABLE 2**  
**Summary of Clinical Chemistry**  
**Males**

| Group Number |    |     | CHOL  | CHOL   | CRE   | CRE    | GGT   | GGT    |
|--------------|----|-----|-------|--------|-------|--------|-------|--------|
|              |    |     | Day 3 | Day 15 | Day 3 | Day 15 | Day 3 | Day 15 |
| Ç            | 1M | Mn: | 130   | 114    | .26   | .31    | 8     | 8      |
|              |    | SD: | 16    | 9      | .06   | .03    | 0     | 0      |
|              |    | N:  | 5     | 5      | 5     | 5      | 5     | 5      |
|              | 2M | Mn: | 142   | 118    | .23   | .29    | 8     | 8      |
|              |    | SD: | 11    | 8      | .02   | .01    | 0     | 0      |
|              |    | N:  | 5     | 5      | 5     | 5      | 5     | 5      |

| Group Number |    |     | GLU   | GLU    | PHOS  | PHOS   | TBIL  | TBIL   |
|--------------|----|-----|-------|--------|-------|--------|-------|--------|
|              |    |     | Day 3 | Day 15 | Day 3 | Day 15 | Day 3 | Day 15 |
| Ç            | 1M | Mn: | 104   | 98     | 9.3   | 8.6    | .07   | .07    |
|              |    | SD: | 40    | 9      | .5    | .5     | .01   | .01    |
|              |    | N:  | 5     | 5      | 5     | 5      | 5     | 5      |
|              | 2M | Mn: | 102   | 105    | 9.4   | 8.3    | .10   | .07    |
|              |    | SD: | 23    | 17     | .6    | .3     | .03   | .03    |
|              |    | N:  | 5     | 5      | 5     | 5      | 5     | 5      |

| Group Number |    |     | TP    | TP     | TRIG  | TRIG   | GLOB  | GLOB   |
|--------------|----|-----|-------|--------|-------|--------|-------|--------|
|              |    |     | Day 3 | Day 15 | Day 3 | Day 15 | Day 3 | Day 15 |
| Ç            | 1M | Mn: | 5.7   | 6.3    | 76    | 70     | 2.2   | 2.4    |
|              |    | SD: | .5    | .2     | 16    | 26     | .2    | .1     |
|              |    | N:  | 5     | 5      | 5     | 5      | 5     | 5      |
|              | 2M | Mn: | 5.9   | 6.2    | 84    | 84     | 2.3   | 2.4    |
|              |    | SD: | .1    | .2     | 34    | 25     | .1    | .1     |
|              |    | N:  | 5     | 5      | 5     | 5      | 5     | 5      |

BASi Project Number: 1327-14292 (SB-SU-003)

---

**TABLE 2**  
**Summary of Clinical Chemistry**  
**Males**

| Group Number |    |     | A/G<br>Day 3 | A/G<br>Day 15 |
|--------------|----|-----|--------------|---------------|
| Ç            | 1M | Mn: | 1.6          | 1.6           |
| Ç            |    | SD: | .0           | .1            |
| Ç            |    | N:  | 5            | 5             |
|              | 2M | Mn: | 1.6          | 1.6           |
|              |    | SD: | .1           | .1            |
|              |    | N:  | 5            | 5             |

BASi Project Number: 1327-14292 (SB-SU-003)
 

---

**TABLE 2**  
**Summary of Clinical Chemistry**  
**Females**

| Group Number |    |     | NA    | NA     | K     | K      | CL    | CL     |
|--------------|----|-----|-------|--------|-------|--------|-------|--------|
|              |    |     | Day 3 | Day 15 | Day 3 | Day 15 | Day 3 | Day 15 |
| ♀            | 1F | Mn: | 141   | 141    | 4.7   | 4.5    | 104   | 104    |
|              |    | SD: | 1     | 1      | .5    | .3     | 1     | 0      |
|              |    | N:  | 5     | 5      | 5     | 5      | 5     | 5      |
|              | 2F | Mn: | 142   | 141    | 4.7   | 4.5    | 105   | 104    |
|              |    | SD: | 1     | 1      | .2    | .2     | 1     | 2      |
|              |    | N:  | 5     | 5      | 5     | 5      | 5     | 5      |

| Group Number |    |     | ALB   | ALB    | ALP   | ALP    | ALT   | ALT    |
|--------------|----|-----|-------|--------|-------|--------|-------|--------|
|              |    |     | Day 3 | Day 15 | Day 3 | Day 15 | Day 3 | Day 15 |
| ♀            | 1F | Mn: | 3.9   | 3.9    | 146   | 123    | 44    | 56     |
|              |    | SD: | .2    | .1     | 20    | 22     | 5     | 9      |
|              |    | N:  | 5     | 5      | 5     | 5      | 5     | 5      |
|              | 2F | Mn: | 3.8   | 3.9    | 146   | 141    | 51    | 57     |
|              |    | SD: | .1    | .2     | 26    | 14     | 6     | 8      |
|              |    | N:  | 5     | 5      | 5     | 5      | 5     | 5      |

| Group Number |    |     | AST   | AST    | BUN   | BUN    | CA    | CA     |
|--------------|----|-----|-------|--------|-------|--------|-------|--------|
|              |    |     | Day 3 | Day 15 | Day 3 | Day 15 | Day 3 | Day 15 |
| ♀            | 1F | Mn: | 103   | 112    | 20    | 20     | 9.9   | 9.7    |
|              |    | SD: | 11    | 12     | 6     | 2      | .2    | .1     |
|              |    | N:  | 5     | 5      | 5     | 5      | 5     | 5      |
|              | 2F | Mn: | 110   | 110    | 20    | 21     | 9.7   | 9.9    |
|              |    | SD: | 9     | 7      | 2     | 1      | .1    | .2     |
|              |    | N:  | 5     | 5      | 5     | 5      | 5     | 5      |

BASi Project Number: 1327-14292 (SB-SU-003)
 

---

**TABLE 2**  
**Summary of Clinical Chemistry**  
**Females**

| Group Number |    |     | CHOL  | CHOL   | CRE   | CRE    | GGT   | GGT    |
|--------------|----|-----|-------|--------|-------|--------|-------|--------|
|              |    |     | Day 3 | Day 15 | Day 3 | Day 15 | Day 3 | Day 15 |
| Ç            | 1F | Mn: | 130   | 106    | .28   | .32    | 8     | 8      |
|              |    | SD: | 18    | 13     | .08   | .03    | 0     | 0      |
|              |    | N:  | 5     | 5      | 5     | 5      | 5     | 5      |
|              | 2F | Mn: | 132   | 116    | .27   | .34    | 8     | 8      |
|              |    | SD: | 4     | 8      | .02   | .05    | 0     | 0      |
|              |    | N:  | 5     | 5      | 5     | 5      | 5     | 5      |

| Group Number |    |     | GLU   | GLU    | PHOS  | PHOS   | TBIL  | TBIL   |
|--------------|----|-----|-------|--------|-------|--------|-------|--------|
|              |    |     | Day 3 | Day 15 | Day 3 | Day 15 | Day 3 | Day 15 |
| Ç            | 1F | Mn: | 88    | 99     | 7.2   | 6.3    | .05   | .10    |
|              |    | SD: | 10    | 10     | .6    | .5     | .01   | .01    |
|              |    | N:  | 5     | 5      | 5     | 5      | 5     | 5      |
|              | 2F | Mn: | 106   | 103    | 7.2   | 6.5    | .05   | .08    |
|              |    | SD: | 18    | 13     | .4    | .7     | .00   | .02    |
|              |    | N:  | 5     | 5      | 5     | 5      | 5     | 5      |

| Group Number |    |     | TP    | TP     | TRIG  | TRIG   | GLOB  | GLOB   |
|--------------|----|-----|-------|--------|-------|--------|-------|--------|
|              |    |     | Day 3 | Day 15 | Day 3 | Day 15 | Day 3 | Day 15 |
| Ç            | 1F | Mn: | 6.2   | 6.2    | 55    | 44     | 2.3   | 2.3    |
|              |    | SD: | .4    | .2     | 16    | 12     | .1    | .1     |
|              |    | N:  | 5     | 5      | 5     | 5      | 5     | 5      |
|              | 2F | Mn: | 6.1   | 6.3    | 41    | 64     | 2.3   | 2.4    |
|              |    | SD: | .2    | .3     | 11    | 22     | .1    | .2     |
|              |    | N:  | 5     | 5      | 5     | 5      | 5     | 5      |

BASi Project Number: 1327-14292 (SB-SU-003)

---

**TABLE 2**  
**Summary of Clinical Chemistry**  
**Females**

| Group Number |    |     | A/G<br>Day 3 | A/G<br>Day 15 |
|--------------|----|-----|--------------|---------------|
| Ç            | 1F | Mn: | 1.7          | 1.7           |
| Ç            |    | SD: | .0           | .0            |
| Ç            |    | N:  | 5            | 5             |
|              | 2F | Mn: | 1.7          | 1.6           |
|              |    | SD: | .1           | .1            |
|              |    | N:  | 5            | 5             |

BASi Study Number: 1327-14292 (SB-SU-003)

Appendix No. 1

---

## Individual Hematology and Coagulation

BASi Study Number: 1327-14292 (SB-SU-003)

Appendix No. 1

### Key to Individual Hematology and Coagulation

#### Dosage Key

| Group Number | Dose Level           | Dose Conc. | Dose Volume | Dosing Route | Total # of Animals | Day 3 Cohort | Day 15 Cohort |
|--------------|----------------------|------------|-------------|--------------|--------------------|--------------|---------------|
| 1            | 0.00 mg/kg (vehicle) | 0.00 mg/ml | 5 ml/kg     | IV           | 10M<br>10F         | 5M<br>5F     | 5M<br>5F      |
| 2            | 1.10 mg/kg           | 0.22 mg/ml | 5 ml/kg     | IV           | 10M<br>10F         | 5M<br>5F     | 5M<br>5F      |

#### Abbreviations

|       |                                       |                                  |
|-------|---------------------------------------|----------------------------------|
| WBC   | White blood cell count                | x 10 <sup>3</sup> cells/ $\mu$ L |
| ANE   | Absolute neutrophil count             | x 10 <sup>3</sup> cells/ $\mu$ L |
| ALY   | Absolute lymphocyte count             | x 10 <sup>3</sup> cells/ $\mu$ L |
| AMO   | Absolute monocyte count               | x 10 <sup>3</sup> cells/ $\mu$ L |
| AEO   | Absolute eosinophil count             | x 10 <sup>3</sup> cells/ $\mu$ L |
| ABA   | Absolute basophil count               | x 10 <sup>3</sup> cells/ $\mu$ L |
| ALUC  | Absolute large unstained cell count   | x 10 <sup>3</sup> cells/ $\mu$ L |
| RBC   | Red blood cell count                  | x 10 <sup>6</sup> cells/ $\mu$ L |
| HB    | Hemoglobin                            | g/dL                             |
| HCT   | Hematocrit                            | Percent                          |
| MCV   | Mean cell volume                      | fL                               |
| MCH   | Mean cell hemoglobin                  | pg                               |
| MCHC  | Mean cell hemoglobin concentration    | g/dL                             |
| PLT   | Platelet count                        | x 10 <sup>3</sup> cells/ $\mu$ L |
| Retic | Reticulocyte count                    | Percent                          |
| PT    | Prothrombin time                      | Seconds                          |
| APTT  | Activated partial thromboplastin time | Seconds                          |
| FIB   | Fibrinogen                            | mg/dL                            |

#### Report Code Key

|    |                                               |
|----|-----------------------------------------------|
| A  | = Absent values and/or additional information |
| Q  | = Quantity not sufficient                     |
| -  | = Animal not sampled at time point            |
| X  | = Animal dead                                 |
| 1+ | = 10-25%                                      |
| 3+ | = 51-75%                                      |

BASi Study Number: 1327-14292 (SB-SU-003)

Appendix No. 1

**Key to Individual Hematology and Coagulation (cont.)**

**Absent Values and/or Additional Information**

Day 3

1M801 3+ platelet clumping noted on slide  
1F827 Few platelet clumps noted on slide  
2F835 Few platelet clumps noted on slide

The following animals had elevated values, but insufficient quantity for confirmation. These values were not included in the report.

| Animal No. | APTT | PT   |
|------------|------|------|
| 2M811      | 61.2 |      |
| 1F825      | 57.9 |      |
| 1F826      | 42.1 |      |
| 1F827      | 50.9 |      |
| 2F835      | 35.0 |      |
| 2F833      |      | 37.3 |

Day 15

1M809 1+ platelet clumping noted on slide  
1M810 Few platelet clumps noted on slide  
2M816 Few platelet clumps noted on slide  
2M818 1+ platelet clumping noted on slide  
2M819 Few platelet clumps noted on slide  
2M820 Few platelet clumps noted on slide  
1F831 1+ platelet clumping noted on slide  
1F832 Few platelet clumps noted on slide

The following animals had elevated values, but insufficient quantity for confirmation. These values were not included in the report.

| Animal No. | APTT | PT   |
|------------|------|------|
| 1F830      |      | 20.6 |
| 2F838      | 33.8 |      |

**Dunnett's Test Key**

- \* = .05 Significance by Dunnett's Test
- + = .01 Significance by Dunnett's Test
- < = Less than 5 degrees of freedom by Dunnett's Test
- Ç = Control group used for Dunnett's Test comparison



BASi Study Number: 1327-14292 (SB-SU-003)

Appendix No. 1

**Individual Hematology and Coagulation  
 Males**

| Animal Number |        | WBC<br>Day 3 | WBC<br>Day 15 | ANE<br>Day 3 | ANE<br>Day 15 | ALY<br>Day 3 | ALY<br>Day 15 |
|---------------|--------|--------------|---------------|--------------|---------------|--------------|---------------|
| 1M            | 801    | 8.58         | X             | 1.38         | X             | 6.75         | X             |
| 1M            | 802    | 8.30         | X             | 1.90         | X             | 5.88         | X             |
| 1M            | 803    | 10.44        | X             | 1.52         | X             | 8.37         | X             |
| 1M            | 804    | 13.75        | X             | 2.17         | X             | 10.88        | X             |
| 1M            | 805    | 9.67         | X             | 1.67         | X             | 7.49         | X             |
| 1M            | 806    | -            | 13.27         | -            | 1.38          | -            | 11.35         |
| 1M            | 807    | -            | 10.93         | -            | 1.74          | -            | 8.63          |
| 1M            | 808    | -            | 12.40         | -            | 1.97          | -            | 9.77          |
| 1M            | 809    | -            | 13.88         | -            | 2.28          | -            | 10.84         |
| 1M            | 810    | -            | 12.04         | -            | 2.26          | -            | 9.10          |
| ♀             | 1M Mn: | 10.15        | 12.50         | 1.73         | 1.93          | 7.88         | 9.94          |
| 2M            | 811    | 11.00        | X             | 1.47         | X             | 8.68         | X             |
| 2M            | 812    | 13.75        | X             | 1.76         | X             | 11.23        | X             |
| 2M            | 813    | 11.97        | X             | 1.59         | X             | 9.50         | X             |
| 2M            | 814    | 13.74        | X             | 1.79         | X             | 11.16        | X             |
| 2M            | 815    | 15.05        | X             | 2.38         | X             | 11.77        | X             |
| 2M            | 816    | -            | 12.42         | -            | 1.89          | -            | 9.97          |
| 2M            | 817    | -            | 10.61         | -            | 1.06          | -            | 9.10          |
| 2M            | 818    | -            | 12.90         | -            | 1.77          | -            | 10.45         |
| 2M            | 819    | -            | 9.85          | -            | 1.38          | -            | 8.16          |
| 2M            | 820    | -            | 10.78         | -            | 1.28          | -            | 8.99          |
| 2M            | Mn:    | 13.10*       | 11.31         | 1.80         | 1.48          | 10.47*       | 9.33          |

BASi Study Number: 1327-14292 (SB-SU-003)

Appendix No. 1

**Individual Hematology and Coagulation  
Males**

| Animal Number |        | AMO<br>Day 3 | AMO<br>Day 15 | AEO<br>Day 3 | AEO<br>Day 15 | ABA<br>Day 3 | ABA<br>Day 15 |
|---------------|--------|--------------|---------------|--------------|---------------|--------------|---------------|
| 1M            | 801    | .19          | X             | .20          | X             | .02          | X             |
| 1M            | 802    | .37          | X             | .05          | X             | .03          | X             |
| 1M            | 803    | .34          | X             | .07          | X             | .05          | X             |
| 1M            | 804    | .43          | X             | .11          | X             | .07          | X             |
| 1M            | 805    | .33          | X             | .06          | X             | .04          | X             |
| 1M            | 806    | -            | .31           | -            | .08           | -            | .05           |
| 1M            | 807    | -            | .37           | -            | .05           | -            | .05           |
| 1M            | 808    | -            | .37           | -            | .09           | -            | .12           |
| 1M            | 809    | -            | .57           | -            | .06           | -            | .06           |
| 1M            | 810    | -            | .46           | -            | .07           | -            | .06           |
| ♀             | 1M Mn: | .33          | .42           | .10          | .07           | .04          | .07           |
| 2M            | 811    | .66          | X             | .06          | X             | .04          | X             |
| 2M            | 812    | .51          | X             | .10          | X             | .07          | X             |
| 2M            | 813    | .66          | X             | .05          | X             | .05          | X             |
| 2M            | 814    | .48          | X             | .12          | X             | .07          | X             |
| 2M            | 815    | .59          | X             | .09          | X             | .09          | X             |
| 2M            | 816    | -            | .34           | -            | .07           | -            | .06           |
| 2M            | 817    | -            | .25           | -            | .06           | -            | .03           |
| 2M            | 818    | -            | .43           | -            | .09           | -            | .05           |
| 2M            | 819    | -            | .16           | -            | .04           | -            | .09           |
| 2M            | 820    | -            | .27           | -            | .10           | -            | .08           |
| 2M            | Mn:    | .58+         | .29           | .08          | .07           | .06          | .06           |

BASi Study Number: 1327-14292 (SB-SU-003)

Appendix No. 1

**Individual Hematology and Coagulation  
Males**

| Animal Number |        | ALUC<br>Day 3 | ALUC<br>Day 15 | RBC<br>Day 3 | RBC<br>Day 15 | HB<br>Day 3 | HB<br>Day 15 |
|---------------|--------|---------------|----------------|--------------|---------------|-------------|--------------|
| 1M            | 801    | .04           | X              | 7.73         | X             | 15.2        | X            |
| 1M            | 802    | .06           | X              | 6.06         | X             | 11.7        | X            |
| 1M            | 803    | .06           | X              | 7.32         | X             | 14.7        | X            |
| 1M            | 804    | .10           | X              | 7.53         | X             | 15.2        | X            |
| 1M            | 805    | .08           | X              | 7.54         | X             | 14.5        | X            |
| 1M            | 806    | -             | .11            | -            | 7.97          | -           | 14.9         |
| 1M            | 807    | -             | .07            | -            | 8.22          | -           | 15.7         |
| 1M            | 808    | -             | .09            | -            | 8.20          | -           | 15.1         |
| 1M            | 809    | -             | .08            | -            | 8.23          | -           | 15.8         |
| 1M            | 810    | -             | .08            | -            | 8.22          | -           | 15.6         |
| ♀             | 1M Mn: | .07           | .09            | 7.24         | 8.17          | 14.3        | 15.4         |
| 2M            | 811    | .10           | X              | 7.56         | X             | 14.6        | X            |
| 2M            | 812    | .10           | X              | 7.71         | X             | 14.5        | X            |
| 2M            | 813    | .12           | X              | 7.48         | X             | 15.2        | X            |
| 2M            | 814    | .11           | X              | 7.28         | X             | 14.1        | X            |
| 2M            | 815    | .14           | X              | 7.60         | X             | 14.5        | X            |
| 2M            | 816    | -             | .09            | -            | 7.95          | -           | 15.4         |
| 2M            | 817    | -             | .10            | -            | 7.94          | -           | 15.5         |
| 2M            | 818    | -             | .10            | -            | 7.97          | -           | 15.6         |
| 2M            | 819    | -             | .05            | -            | 8.13          | -           | 15.4         |
| 2M            | 820    | -             | .08            | -            | 8.26          | -           | 15.9         |
| 2M            | Mn:    | .11+          | .08            | 7.53         | 8.05          | 14.6        | 15.6         |

BASi Study Number: 1327-14292 (SB-SU-003)

Appendix No. 1

**Individual Hematology and Coagulation  
Males**

| Animal Number |        | HCT<br>Day 3 | HCT<br>Day 15 | MCV<br>Day 3 | MCV<br>Day 15 | MCH<br>Day 3 | MCH<br>Day 15 |
|---------------|--------|--------------|---------------|--------------|---------------|--------------|---------------|
| 1M            | 801    | 48.5         | X             | 62.7         | X             | 19.7         | X             |
| 1M            | 802    | 36.8         | X             | 60.6         | X             | 19.3         | X             |
| 1M            | 803    | 45.5         | X             | 62.2         | X             | 20.0         | X             |
| 1M            | 804    | 47.3         | X             | 62.9         | X             | 20.2         | X             |
| 1M            | 805    | 45.1         | X             | 59.8         | X             | 19.3         | X             |
| 1M            | 806    | -            | 46.1          | -            | 57.9          | -            | 18.7          |
| 1M            | 807    | -            | 47.3          | -            | 57.6          | -            | 19.0          |
| 1M            | 808    | -            | 45.8          | -            | 55.8          | -            | 18.4          |
| 1M            | 809    | -            | 47.4          | -            | 57.6          | -            | 19.2          |
| 1M            | 810    | -            | 47.2          | -            | 57.4          | -            | 18.9          |
| ♀             | 1M Mn: | 44.6         | 46.8          | 61.6         | 57.3          | 19.7         | 18.8          |
| 2M            | 811    | 45.2         | X             | 59.9         | X             | 19.3         | X             |
| 2M            | 812    | 46.0         | X             | 59.7         | X             | 18.8         | X             |
| 2M            | 813    | 48.4         | X             | 64.7         | X             | 20.4         | X             |
| 2M            | 814    | 44.0         | X             | 60.4         | X             | 19.4         | X             |
| 2M            | 815    | 45.4         | X             | 59.8         | X             | 19.1         | X             |
| 2M            | 816    | -            | 46.8          | -            | 58.9          | -            | 19.3          |
| 2M            | 817    | -            | 46.5          | -            | 58.6          | -            | 19.5          |
| 2M            | 818    | -            | 47.5          | -            | 59.6          | -            | 19.6          |
| 2M            | 819    | -            | 46.1          | -            | 56.7          | -            | 18.9          |
| 2M            | 820    | -            | 48.1          | -            | 58.3          | -            | 19.2          |
| 2M            | Mn:    | 45.8         | 47.0          | 60.9         | 58.4          | 19.4         | 19.3*         |

BASi Study Number: 1327-14292 (SB-SU-003)

Appendix No. 1

**Individual Hematology and Coagulation**  
**Males**

| Animal Number |        | MCHC<br>Day 3 | MCHC<br>Day 15 | PLT<br>Day 3 | PLT<br>Day 15 | Retic<br>Day 3 | Retic<br>Day 15 |
|---------------|--------|---------------|----------------|--------------|---------------|----------------|-----------------|
| 1M            | 801    | 31.4          | X              | 1352A        | X             | 5.51           | X               |
| 1M            | 802    | 31.8          | X              | 1380         | X             | 5.42           | X               |
| 1M            | 803    | 32.2          | X              | 1231         | X             | 5.01           | X               |
| 1M            | 804    | 32.1          | X              | 1266         | X             | 6.88           | X               |
| 1M            | 805    | 32.2          | X              | 1241         | X             | 5.46           | X               |
| 1M            | 806    | -             | 32.3           | -            | 1205          | -              | 4.49            |
| 1M            | 807    | -             | 33.1           | -            | 1168          | -              | 4.76            |
| 1M            | 808    | -             | 32.9           | -            | 1018          | -              | 3.88            |
| 1M            | 809    | -             | 33.3           | -            | 1318A         | -              | 4.14            |
| 1M            | 810    | -             | 32.9           | -            | 999A          | -              | 3.99            |
| ♀             | 1M Mn: | 31.9          | 32.9           | 1294         | 1142          | 5.66           | 4.25            |
| 2M            | 811    | 32.3          | X              | 984          | X             | 5.22           | X               |
| 2M            | 812    | 31.5          | X              | 1628         | X             | 5.38           | X               |
| 2M            | 813    | 31.5          | X              | 1108         | X             | 10.17          | X               |
| 2M            | 814    | 32.1          | X              | 1720         | X             | 5.75           | X               |
| 2M            | 815    | 32.0          | X              | 1311         | X             | 4.68           | X               |
| 2M            | 816    | -             | 32.8           | -            | 1121A         | -              | 4.17            |
| 2M            | 817    | -             | 33.2           | -            | 1168          | -              | 4.80            |
| 2M            | 818    | -             | 32.8           | -            | 1005A         | -              | 4.92            |
| 2M            | 819    | -             | 33.3           | -            | 1199A         | -              | 3.92            |
| 2M            | 820    | -             | 33.0           | -            | 1234A         | -              | 4.24            |
| 2M            | Mn:    | 31.9          | 33.0           | 1350         | 1145          | 6.24           | 4.41            |

BASi Study Number: 1327-14292 (SB-SU-003)

Appendix No. 1

**Individual Hematology and Coagulation  
Males**

| Animal Number |        | PT<br>Day 3 | PT<br>Day 15 | APTT<br>Day 3 | APTT<br>Day 15 | FIB<br>Day 3 | FIB<br>Day 15 |
|---------------|--------|-------------|--------------|---------------|----------------|--------------|---------------|
| 1M            | 801    | Q           | X            | 22.1          | X              | Q            | X             |
| 1M            | 802    | 19.4        | X            | 21.1          | X              | Q            | X             |
| 1M            | 803    | 16.5        | X            | 22.0          | X              | Q            | X             |
| 1M            | 804    | 16.5        | X            | 19.0          | X              | Q            | X             |
| 1M            | 805    | 16.0        | X            | 15.9          | X              | Q            | X             |
| 1M            | 806    | -           | 14.8         | -             | 10.5           | -            | Q             |
| 1M            | 807    | -           | 15.6         | -             | 38.1           | -            | Q             |
| 1M            | 808    | -           | 15.9         | -             | 19.6           | -            | Q             |
| 1M            | 809    | -           | 17.1         | -             | 13.2           | -            | Q             |
| 1M            | 810    | -           | 15.6         | -             | 23.4           | -            | Q             |
| ♀             | 1M Mn: | 17.1        | 15.8         | 20.0          | 21.0           | -            | -             |
| 2M            | 811    | 18.5        | X            | Q             | X              | Q            | X             |
| 2M            | 812    | 17.0        | X            | Q             | X              | Q            | X             |
| 2M            | 813    | 18.4        | X            | 18.1          | X              | Q            | X             |
| 2M            | 814    | 17.3        | X            | 28.7          | X              | Q            | X             |
| 2M            | 815    | Q           | X            | 18.6          | X              | Q            | X             |
| 2M            | 816    | -           | 16.3         | -             | 20.1           | -            | Q             |
| 2M            | 817    | -           | 15.0         | -             | 16.4           | -            | Q             |
| 2M            | 818    | -           | 15.2         | -             | 45.9           | -            | Q             |
| 2M            | 819    | -           | 14.8         | -             | 19.5           | -            | Q             |
| 2M            | 820    | -           | 16.0         | -             | 20.5           | -            | Q             |
| 2M            | Mn:    | 17.8        | 15.5         | 21.8          | 24.5           | -            | -             |

BASi Study Number: 1327-14292 (SB-SU-003)

Appendix No. 1

**Individual Hematology and Coagulation  
Females**

| Animal Number |        | WBC<br>Day 3 | WBC<br>Day 15 | ANE<br>Day 3 | ANE<br>Day 15 | ALY<br>Day 3 | ALY<br>Day 15 |
|---------------|--------|--------------|---------------|--------------|---------------|--------------|---------------|
| 1F            | 823    | 6.96         | X             | 1.36         | X             | 5.28         | X             |
| 1F            | 824    | 6.09         | X             | 1.78         | X             | 4.02         | X             |
| 1F            | 825    | 5.61         | X             | .74          | X             | 4.65         | X             |
| 1F            | 826    | 6.33         | X             | .72          | X             | 5.32         | X             |
| 1F            | 827    | 7.20         | X             | 1.08         | X             | 5.82         | X             |
| 1F            | 828    | -            | 9.57          | -            | 1.74          | -            | 7.48          |
| 1F            | 829    | -            | 8.62          | -            | 1.84          | -            | 6.24          |
| 1F            | 830    | -            | 12.05         | -            | 2.53          | -            | 9.03          |
| 1F            | 831    | -            | 6.95          | -            | 1.55          | -            | 5.14          |
| 1F            | 832    | -            | 8.36          | -            | 1.11          | -            | 6.89          |
| Ç             | 1F Mn: | 6.44         | 9.11          | 1.14         | 1.76          | 5.02         | 6.96          |
| 2F            | 833    | 4.38         | X             | .55          | X             | 3.63         | X             |
| 2F            | 834    | 6.29         | X             | .52          | X             | 5.50         | X             |
| 2F            | 835    | 5.90         | X             | 1.10         | X             | 4.47         | X             |
| 2F            | 836    | 9.05         | X             | 1.34         | X             | 7.39         | X             |
| 2F            | 837    | 7.19         | X             | .50          | X             | 6.44         | X             |
| 2F            | 838    | -            | 9.91          | -            | 1.15          | -            | 8.30          |
| 2F            | 839    | -            | 8.33          | -            | 1.15          | -            | 6.93          |
| 2F            | 840    | -            | 6.69          | -            | .84           | -            | 5.57          |
| 2F            | 841    | -            | 7.25          | -            | .90           | -            | 6.10          |
| 2F            | 842    | -            | 9.98          | -            | 1.68          | -            | 7.81          |
| 2F            | Mn:    | 6.56         | 8.43          | .80          | 1.14          | 5.48         | 6.95          |

BASi Study Number: 1327-14292 (SB-SU-003)

Appendix No. 1

**Individual Hematology and Coagulation  
Females**

| Animal Number | AMO   |        | AEO   |        | ABA   |        |
|---------------|-------|--------|-------|--------|-------|--------|
|               | Day 3 | Day 15 | Day 3 | Day 15 | Day 3 | Day 15 |
| 1F 823        | .19   | X      | .09   | X      | .02   | X      |
| 1F 824        | .16   | X      | .09   | X      | .02   | X      |
| 1F 825        | .12   | X      | .04   | X      | .02   | X      |
| 1F 826        | .15   | X      | .08   | X      | .01   | X      |
| 1F 827        | .09   | X      | .10   | X      | .05   | X      |
| 1F 828        | -     | .15    | -     | .12    | -     | .03    |
| 1F 829        | -     | .22    | -     | .20    | -     | .06    |
| 1F 830        | -     | .18    | -     | .19    | -     | .06    |
| 1F 831        | -     | .11    | -     | .10    | -     | .02    |
| 1F 832        | -     | .14    | -     | .11    | -     | .04    |
| ♀ 1F Mn:      | .14   | .16    | .08   | .14    | .02   | .04    |
| 2F 833        | .09   | X      | .06   | X      | .03   | X      |
| 2F 834        | .09   | X      | .05   | X      | .08   | X      |
| 2F 835        | .17   | X      | .06   | X      | .06   | X      |
| 2F 836        | .10   | X      | .12   | X      | .05   | X      |
| 2F 837        | .12   | X      | .07   | X      | .01   | X      |
| 2F 838        | -     | .20    | -     | .14    | -     | .05    |
| 2F 839        | -     | .10    | -     | .07    | -     | .03    |
| 2F 840        | -     | .09    | -     | .13    | -     | .03    |
| 2F 841        | -     | .09    | -     | .09    | -     | .03    |
| 2F 842        | -     | .20    | -     | .19    | -     | .04    |
| 2F Mn:        | .11   | .14    | .07   | .12    | .05   | .04    |



BASi Study Number: 1327-14292 (SB-SU-003)

Appendix No. 1

**Individual Hematology and Coagulation  
Females**

| Animal Number | ALUC<br>Day 3 | ALUC<br>Day 15 | RBC<br>Day 3 | RBC<br>Day 15 | HB<br>Day 3 | HB<br>Day 15 |
|---------------|---------------|----------------|--------------|---------------|-------------|--------------|
| 1F 823        | .02           | X              | 7.64         | X             | 14.7        | X            |
| 1F 824        | .02           | X              | 7.31         | X             | 14.1        | X            |
| 1F 825        | .03           | X              | 7.59         | X             | 14.9        | X            |
| 1F 826        | .05           | X              | 7.42         | X             | 14.6        | X            |
| 1F 827        | .06           | X              | 7.49         | X             | 14.6        | X            |
| 1F 828        | -             | .04            | -            | 7.62          | -           | 14.5         |
| 1F 829        | -             | .06            | -            | 7.98          | -           | 15.1         |
| 1F 830        | -             | .05            | -            | 7.67          | -           | 14.8         |
| 1F 831        | -             | .03            | -            | 7.69          | -           | 14.9         |
| 1F 832        | -             | .06            | -            | 7.75          | -           | 15.2         |
| ♀ 1F Mn:      | .04           | .05            | 7.49         | 7.74          | 14.6        | 14.9         |
| 2F 833        | .02           | X              | 7.19         | X             | 14.5        | X            |
| 2F 834        | .05           | X              | 7.18         | X             | 13.9        | X            |
| 2F 835        | .04           | X              | 7.54         | X             | 14.4        | X            |
| 2F 836        | .05           | X              | 6.98         | X             | 13.5        | X            |
| 2F 837        | .04           | X              | 7.85         | X             | 15.2        | X            |
| 2F 838        | -             | .07            | -            | 7.66          | -           | 14.6         |
| 2F 839        | -             | .04            | -            | 7.70          | -           | 15.3         |
| 2F 840        | -             | .03            | -            | 7.82          | -           | 14.9         |
| 2F 841        | -             | .03            | -            | 7.69          | -           | 14.9         |
| 2F 842        | -             | .06            | -            | 7.85          | -           | 15.1         |
| 2F Mn:        | .04           | .05            | 7.35         | 7.74          | 14.3        | 15.0         |

BASi Study Number: 1327-14292 (SB-SU-003)

Appendix No. 1

**Individual Hematology and Coagulation  
Females**

| Animal Number | HCT   |        | MCV   |        | MCH   |        |
|---------------|-------|--------|-------|--------|-------|--------|
|               | Day 3 | Day 15 | Day 3 | Day 15 | Day 3 | Day 15 |
| 1F 823        | 45.4  | X      | 59.4  | X      | 19.3  | X      |
| 1F 824        | 42.6  | X      | 58.3  | X      | 19.2  | X      |
| 1F 825        | 45.2  | X      | 59.5  | X      | 19.7  | X      |
| 1F 826        | 43.7  | X      | 59.0  | X      | 19.7  | X      |
| 1F 827        | 43.3  | X      | 57.7  | X      | 19.5  | X      |
| 1F 828        | -     | 42.9   | -     | 56.2   | -     | 19.0   |
| 1F 829        | -     | 44.4   | -     | 55.6   | -     | 18.9   |
| 1F 830        | -     | 43.9   | -     | 57.2   | -     | 19.4   |
| 1F 831        | -     | 43.9   | -     | 57.0   | -     | 19.4   |
| 1F 832        | -     | 43.7   | -     | 56.4   | -     | 19.6   |
| ♀ 1F Mn:      | 44.0  | 43.8   | 58.8  | 56.5   | 19.5  | 19.3   |
| 2F 833        | 42.7  | X      | 59.3  | X      | 20.2  | X      |
| 2F 834        | 43.3  | X      | 60.4  | X      | 19.3  | X      |
| 2F 835        | 43.5  | X      | 57.7  | X      | 19.2  | X      |
| 2F 836        | 41.6  | X      | 59.6  | X      | 19.3  | X      |
| 2F 837        | 46.0  | X      | 58.5  | X      | 19.3  | X      |
| 2F 838        | -     | 42.8   | -     | 55.9   | -     | 19.0   |
| 2F 839        | -     | 44.5   | -     | 57.7   | -     | 19.8   |
| 2F 840        | -     | 44.2   | -     | 56.6   | -     | 19.0   |
| 2F 841        | -     | 44.5   | -     | 57.8   | -     | 19.4   |
| 2F 842        | -     | 44.3   | -     | 56.5   | -     | 19.2   |
| 2F Mn:        | 43.4  | 44.1   | 59.1  | 56.9   | 19.5  | 19.3   |

BASi Study Number: 1327-14292 (SB-SU-003)

Appendix No. 1

**Individual Hematology and Coagulation  
 Females**

| Animal Number |        | MCHC<br>Day 3 | MCHC<br>Day 15 | PLT<br>Day 3 | PLT<br>Day 15 | Retic<br>Day 3 | Retic<br>Day 15 |
|---------------|--------|---------------|----------------|--------------|---------------|----------------|-----------------|
| 1F            | 823    | 32.4          | X              | 1577         | X             | 4.20           | X               |
| 1F            | 824    | 33.0          | X              | 1354         | X             | 3.37           | X               |
| 1F            | 825    | 33.0          | X              | 1266         | X             | 2.92           | X               |
| 1F            | 826    | 33.3          | X              | 1575         | X             | 3.57           | X               |
| 1F            | 827    | 33.8          | X              | 1283A        | X             | 2.66           | X               |
| 1F            | 828    | -             | 33.8           | -            | 1136          | -              | 2.56            |
| 1F            | 829    | -             | 33.9           | -            | 981           | -              | 3.13            |
| 1F            | 830    | -             | 33.8           | -            | 1170          | -              | 2.21            |
| 1F            | 831    | -             | 34.1           | -            | 1297A         | -              | 4.39            |
| 1F            | 832    | -             | 34.8           | -            | 1262A         | -              | 2.15            |
| Ç             | 1F Mn: | 33.1          | 34.1           | 1411         | 1169          | 3.34           | 2.89            |
| 2F            | 833    | 34.1          | X              | 1316         | X             | 4.74           | X               |
| 2F            | 834    | 32.0          | X              | 1292         | X             | 3.67           | X               |
| 2F            | 835    | 33.2          | X              | 1597A        | X             | 3.63           | X               |
| 2F            | 836    | 32.4          | X              | 1567         | X             | 5.10           | X               |
| 2F            | 837    | 33.0          | X              | 1309         | X             | 2.89           | X               |
| 2F            | 838    | -             | 34.0           | -            | 1179          | -              | 2.39            |
| 2F            | 839    | -             | 34.4           | -            | 1105          | -              | 2.66            |
| 2F            | 840    | -             | 33.6           | -            | 1352          | -              | 3.25            |
| 2F            | 841    | -             | 33.6           | -            | 1124          | -              | 3.59            |
| 2F            | 842    | -             | 34.0           | -            | 1113          | -              | 3.78            |
| 2F            | Mn:    | 32.9          | 33.9           | 1416         | 1175          | 4.01           | 3.13            |

BASi Study Number: 1327-14292 (SB-SU-003)

Appendix No. 1

**Individual Hematology and Coagulation  
 Females**

| Animal Number |        | PT<br>Day 3 | PT<br>Day 15 | APTT<br>Day 3 | APTT<br>Day 15 | FIB<br>Day 3 | FIB<br>Day 15 |
|---------------|--------|-------------|--------------|---------------|----------------|--------------|---------------|
| 1F            | 823    | 17.1        | X            | 27.4          | X              | Q            | X             |
| 1F            | 824    | 16.6        | X            | Q             | X              | Q            | X             |
| 1F            | 825    | 18.0        | X            | Q             | X              | Q            | X             |
| 1F            | 826    | 15.5        | X            | Q             | X              | Q            | X             |
| 1F            | 827    | 16.8        | X            | Q             | X              | Q            | X             |
| 1F            | 828    | -           | 15.2         | -             | 21.6           | -            | Q             |
| 1F            | 829    | -           | 16.6         | -             | 18.0           | -            | Q             |
| 1F            | 830    | -           | Q            | -             | Q              | -            | Q             |
| 1F            | 831    | -           | 17.9         | -             | 20.5           | -            | Q             |
| 1F            | 832    | -           | 15.3         | -             | 15.0           | -            | Q             |
| ♀             | 1F Mn: | 16.8        | 16.3         | 27.4          | 18.8           | -            | -             |
| 2F            | 833    | Q           | X            | Q             | X              | Q            | X             |
| 2F            | 834    | 15.8        | X            | 24.6          | X              | Q            | X             |
| 2F            | 835    | 17.0        | X            | Q             | X              | Q            | X             |
| 2F            | 836    | 16.6        | X            | 17.6          | X              | Q            | X             |
| 2F            | 837    | Q           | X            | 20.2          | X              | Q            | X             |
| 2F            | 838    | -           | 15.7         | -             | Q              | -            | Q             |
| 2F            | 839    | -           | 14.7         | -             | 15.0           | -            | Q             |
| 2F            | 840    | -           | 17.9         | -             | 14.4           | -            | Q             |
| 2F            | 841    | -           | 15.6         | -             | 12.8           | -            | Q             |
| 2F            | 842    | -           | 14.7         | -             | 14.0           | -            | Q             |
| 2F            | Mn:    | 16.5        | 15.7         | 20.8<         | 14.1*          | -            | -             |

BASi Study Number: 1327-14292 (SB-SU-003)

Appendix No. 2

---

## Individual Clinical Chemistry

BASi Study Number: 1327-14292 (SB-SU-003)

Appendix No. 2

### Key to Individual Clinical Chemistry

#### Dosage Key

| Group Number | Dose Level           | Dose Conc. | Dose Volume | Dosing Route | Total # of Animals | Day 3 Cohort | Day 15 Cohort |
|--------------|----------------------|------------|-------------|--------------|--------------------|--------------|---------------|
| 1            | 0.00 mg/kg (vehicle) | 0.00 mg/ml | 5 ml/kg     | IV           | 10M<br>10F         | 5M<br>5F     | 5M<br>5F      |
| 2            | 1.10 mg/kg           | 0.22 mg/ml | 5 ml/kg     | IV           | 10M<br>10F         | 5M<br>5F     | 5M<br>5F      |

#### Abbreviations

|      |                                     |       |
|------|-------------------------------------|-------|
| NA   | Sodium                              | mEq/L |
| K    | Potassium                           | mEq/L |
| CL   | Chloride                            | mEq/L |
| ALB  | Albumin                             | g/dL  |
| ALP  | Alkaline phosphatase                | U/L   |
| ALT  | Alanine aminotransferase            | U/L   |
| AST  | Aspartate aminotransferase          | U/L   |
| BUN  | Blood urea nitrogen                 | mg/dL |
| CA   | Calcium                             | mg/dL |
| CHOL | Total cholesterol                   | mg/dL |
| CRE  | Creatinine                          | mg/dL |
| GGT  | Gamma Glutamyltransferase           | U/L   |
| GLU  | Glucose                             | mg/dL |
| PHOS | Inorganic phosphorus                | mg/dL |
| TBIL | Total bilirubin                     | mg/dL |
| TP   | Total protein                       | g/dL  |
| TRIG | Triglycerides                       | mg/dL |
| GLOB | Globulin (calculated)               | g/dL  |
| A/G  | Albumin/globulin ratio (calculated) | --    |

BASi Study Number: 1327-14292 (SB-SU-003)

Appendix No. 2

**Key to Individual Clinical Chemistry (cont.)****Report Code Key**

- = Animal not sampled at time point
- X = Animal dead
- 8< = Value less than 8, although reported as 8 for statistical calculations

**Dunnett's Test Key**

- \* = .05 Significance by Dunnett's Test
- + = .01 Significance by Dunnett's Test
- < = Less than 5 degrees of freedom by Dunnett's Test
- Ç = Control group used for Dunnett's Test comparison

BASi Study Number: 1327-14292 (SB-SU-003)

Appendix No. 2

**Individual Clinical Chemistry  
 Males**

| Animal Number |        | NA    |        | K     |        | CL    |        |
|---------------|--------|-------|--------|-------|--------|-------|--------|
|               |        | Day 3 | Day 15 | Day 3 | Day 15 | Day 3 | Day 15 |
| 1M            | 801    | 144   | X      | 5.3   | X      | 102   | X      |
| 1M            | 802    | 141   | X      | 4.6   | X      | 103   | X      |
| 1M            | 803    | 143   | X      | 5.2   | X      | 103   | X      |
| 1M            | 804    | 144   | X      | 5.1   | X      | 102   | X      |
| 1M            | 805    | 143   | X      | 5.2   | X      | 101   | X      |
| 1M            | 806    | -     | 142    | -     | 5.3    | -     | 103    |
| 1M            | 807    | -     | 142    | -     | 4.8    | -     | 101    |
| 1M            | 808    | -     | 142    | -     | 5.0    | -     | 103    |
| 1M            | 809    | -     | 141    | -     | 5.3    | -     | 102    |
| 1M            | 810    | -     | 143    | -     | 5.1    | -     | 105    |
| ♀             | 1M Mn: | 143   | 142    | 5.1   | 5.1    | 102   | 103    |
| 2M            | 811    | 143   | X      | 5.0   | X      | 102   | X      |
| 2M            | 812    | 142   | X      | 5.6   | X      | 102   | X      |
| 2M            | 813    | 143   | X      | 5.4   | X      | 103   | X      |
| 2M            | 814    | 140   | X      | 5.4   | X      | 102   | X      |
| 2M            | 815    | 140   | X      | 5.6   | X      | 101   | X      |
| 2M            | 816    | -     | 143    | -     | 4.4    | -     | 101    |
| 2M            | 817    | -     | 142    | -     | 5.0    | -     | 103    |
| 2M            | 818    | -     | 142    | -     | 4.8    | -     | 102    |
| 2M            | 819    | -     | 142    | -     | 4.9    | -     | 102    |
| 2M            | 820    | -     | 142    | -     | 5.2    | -     | 103    |
| 2M            | Mn:    | 142   | 142    | 5.4   | 4.9    | 102   | 102    |



BASi Study Number: 1327-14292 (SB-SU-003)

Appendix No. 2

**Individual Clinical Chemistry  
 Males**

| Animal Number |        | ALB<br>Day 3 | ALB<br>Day 15 | ALP<br>Day 3 | ALP<br>Day 15 | ALT<br>Day 3 | ALT<br>Day 15 |
|---------------|--------|--------------|---------------|--------------|---------------|--------------|---------------|
| 1M            | 801    | 3.7          | X             | 245          | X             | 63           | X             |
| 1M            | 802    | 3.0          | X             | 233          | X             | 72           | X             |
| 1M            | 803    | 3.6          | X             | 211          | X             | 55           | X             |
| 1M            | 804    | 3.7          | X             | 226          | X             | 63           | X             |
| 1M            | 805    | 3.6          | X             | 262          | X             | 66           | X             |
| 1M            | 806    | -            | 3.7           | -            | 201           | -            | 64            |
| 1M            | 807    | -            | 3.9           | -            | 216           | -            | 66            |
| 1M            | 808    | -            | 3.8           | -            | 171           | -            | 66            |
| 1M            | 809    | -            | 3.9           | -            | 167           | -            | 73            |
| 1M            | 810    | -            | 3.8           | -            | 196           | -            | 70            |
| ♂             | 1M Mn: | 3.5          | 3.8           | 235          | 190           | 64           | 68            |
| 2M            | 811    | 3.5          | X             | 240          | X             | 74           | X             |
| 2M            | 812    | 3.7          | X             | 260          | X             | 75           | X             |
| 2M            | 813    | 3.6          | X             | 245          | X             | 76           | X             |
| 2M            | 814    | 3.6          | X             | 260          | X             | 87           | X             |
| 2M            | 815    | 3.6          | X             | 257          | X             | 73           | X             |
| 2M            | 816    | -            | 3.6           | -            | 254           | -            | 91            |
| 2M            | 817    | -            | 3.7           | -            | 288           | -            | 83            |
| 2M            | 818    | -            | 3.8           | -            | 218           | -            | 71            |
| 2M            | 819    | -            | 3.8           | -            | 202           | -            | 70            |
| 2M            | 820    | -            | 4.0           | -            | 273           | -            | 83            |
| 2M            | Mn:    | 3.6          | 3.8           | 252          | 247*          | 77+          | 80*           |

BASi Study Number: 1327-14292 (SB-SU-003)

Appendix No. 2

**Individual Clinical Chemistry  
Males**

| Animal Number |        | AST<br>Day 3 | AST<br>Day 15 | BUN<br>Day 3 | BUN<br>Day 15 | CA<br>Day 3 | CA<br>Day 15 |
|---------------|--------|--------------|---------------|--------------|---------------|-------------|--------------|
| 1M            | 801    | 138          | X             | 19           | X             | 9.7         | X            |
| 1M            | 802    | 142          | X             | 22           | X             | 9.5         | X            |
| 1M            | 803    | 125          | X             | 15           | X             | 10.1        | X            |
| 1M            | 804    | 105          | X             | 11           | X             | 10.2        | X            |
| 1M            | 805    | 113          | X             | 12           | X             | 10.2        | X            |
| 1M            | 806    | -            | 97            | -            | 15            | -           | 9.8          |
| 1M            | 807    | -            | 106           | -            | 20            | -           | 9.9          |
| 1M            | 808    | -            | 115           | -            | 16            | -           | 9.9          |
| 1M            | 809    | -            | 110           | -            | 17            | -           | 9.9          |
| 1M            | 810    | -            | 108           | -            | 18            | -           | 10.0         |
| ♀             | 1M Mn: | 125          | 107           | 16           | 17            | 9.9         | 9.9          |
| 2M            | 811    | 102          | X             | 15           | X             | 9.6         | X            |
| 2M            | 812    | 121          | X             | 12           | X             | 10.0        | X            |
| 2M            | 813    | 109          | X             | 17           | X             | 10.3        | X            |
| 2M            | 814    | 129          | X             | 14           | X             | 10.1        | X            |
| 2M            | 815    | 116          | X             | 17           | X             | 10.2        | X            |
| 2M            | 816    | -            | 115           | -            | 22            | -           | 10.0         |
| 2M            | 817    | -            | 124           | -            | 19            | -           | 9.7          |
| 2M            | 818    | -            | 111           | -            | 24            | -           | 10.0         |
| 2M            | 819    | -            | 103           | -            | 20            | -           | 9.9          |
| 2M            | 820    | -            | 104           | -            | 15            | -           | 10.0         |
| 2M            | Mn:    | 115          | 111           | 15           | 20            | 10.0        | 9.9          |

BASi Study Number: 1327-14292 (SB-SU-003)

Appendix No. 2

**Individual Clinical Chemistry  
 Males**

| Animal Number |        | CHOL<br>Day 3 | CHOL<br>Day 15 | CRE<br>Day 3 | CRE<br>Day 15 | GGT<br>Day 3 | GGT<br>Day 15 |
|---------------|--------|---------------|----------------|--------------|---------------|--------------|---------------|
| 1M            | 801    | 131           | X              | .32          | X             | 8<           | X             |
| 1M            | 802    | 105           | X              | .32          | X             | 8<           | X             |
| 1M            | 803    | 145           | X              | .24          | X             | 8<           | X             |
| 1M            | 804    | 142           | X              | .25          | X             | 8<           | X             |
| 1M            | 805    | 129           | X              | .19          | X             | 8<           | X             |
| 1M            | 806    | -             | 125            | -            | .27           | -            | 8<            |
| 1M            | 807    | -             | 118            | -            | .35           | -            | 8<            |
| 1M            | 808    | -             | 111            | -            | .32           | -            | 8<            |
| 1M            | 809    | -             | 117            | -            | .32           | -            | 8<            |
| 1M            | 810    | -             | 101            | -            | .29           | -            | 8<            |
| ♀             | 1M Mn: | 130           | 114            | .26          | .31           | 8            | 8             |
| 2M            | 811    | 132           | X              | .23          | X             | 8<           | X             |
| 2M            | 812    | 144           | X              | .24          | X             | 8<           | X             |
| 2M            | 813    | 158           | X              | .24          | X             | 8<           | X             |
| 2M            | 814    | 144           | X              | .19          | X             | 8<           | X             |
| 2M            | 815    | 130           | X              | .23          | X             | 8<           | X             |
| 2M            | 816    | -             | 119            | -            | .28           | -            | 8<            |
| 2M            | 817    | -             | 128            | -            | .30           | -            | 8<            |
| 2M            | 818    | -             | 117            | -            | .31           | -            | 8<            |
| 2M            | 819    | -             | 106            | -            | .28           | -            | 8<            |
| 2M            | 820    | -             | 118            | -            | .28           | -            | 8<            |
| 2M            | Mn:    | 142           | 118            | .23          | .29           | 8            | 8             |

BASi Study Number: 1327-14292 (SB-SU-003)

Appendix No. 2

**Individual Clinical Chemistry  
 Males**

| Animal Number |        | GLU<br>Day 3 | GLU<br>Day 15 | PHOS<br>Day 3 | PHOS<br>Day 15 | TBIL<br>Day 3 | TBIL<br>Day 15 |
|---------------|--------|--------------|---------------|---------------|----------------|---------------|----------------|
| 1M            | 801    | 104          | X             | 9.3           | X              | .06           | X              |
| 1M            | 802    | 174          | X             | 10.2          | X              | .07           | X              |
| 1M            | 803    | 77           | X             | 9.0           | X              | .08           | X              |
| 1M            | 804    | 86           | X             | 8.9           | X              | .08           | X              |
| 1M            | 805    | 81           | X             | 9.0           | X              | .07           | X              |
| 1M            | 806    | -            | 111           | -             | 9.1            | -             | .08            |
| 1M            | 807    | -            | 94            | -             | 8.6            | -             | .06            |
| 1M            | 808    | -            | 93            | -             | 7.9            | -             | .08            |
| 1M            | 809    | -            | 89            | -             | 8.9            | -             | .07            |
| 1M            | 810    | -            | 103           | -             | 8.3            | -             | .07            |
| ♀             | 1M Mn: | 104          | 98            | 9.3           | 8.6            | .07           | .07            |
| 2M            | 811    | 107          | X             | 8.5           | X              | .09           | X              |
| 2M            | 812    | 86           | X             | 9.0           | X              | .08           | X              |
| 2M            | 813    | 73           | X             | 10.0          | X              | .15           | X              |
| 2M            | 814    | 110          | X             | 9.6           | X              | .09           | X              |
| 2M            | 815    | 132          | X             | 9.8           | X              | .09           | X              |
| 2M            | 816    | -            | 88            | -             | 8.8            | -             | .10            |
| 2M            | 817    | -            | 108           | -             | 8.1            | -             | .08            |
| 2M            | 818    | -            | 98            | -             | 8.1            | -             | .08            |
| 2M            | 819    | -            | 99            | -             | 8.3            | -             | .08            |
| 2M            | 820    | -            | 133           | -             | 8.3            | -             | .02            |
| 2M            | Mn:    | 102          | 105           | 9.4           | 8.3            | .10           | .07            |

BASi Study Number: 1327-14292 (SB-SU-003)

Appendix No. 2

**Individual Clinical Chemistry  
Males**

| Animal Number |        | TP<br>Day 3 | TP<br>Day 15 | TRIG<br>Day 3 | TRIG<br>Day 15 | GLOB<br>Day 3 | GLOB<br>Day 15 |
|---------------|--------|-------------|--------------|---------------|----------------|---------------|----------------|
| 1M            | 801    | 6.0         | X            | 92            | X              | 2.3           | X              |
| 1M            | 802    | 4.9         | X            | 60            | X              | 1.9           | X              |
| 1M            | 803    | 5.9         | X            | 60            | X              | 2.3           | X              |
| 1M            | 804    | 6.0         | X            | 75            | X              | 2.3           | X              |
| 1M            | 805    | 5.9         | X            | 92            | X              | 2.3           | X              |
| 1M            | 806    | -           | 6.0          | -             | 82             | -             | 2.3            |
| 1M            | 807    | -           | 6.3          | -             | 71             | -             | 2.4            |
| 1M            | 808    | -           | 6.4          | -             | 106            | -             | 2.6            |
| 1M            | 809    | -           | 6.4          | -             | 51             | -             | 2.5            |
| 1M            | 810    | -           | 6.2          | -             | 40             | -             | 2.4            |
| ♀             | 1M Mn: | 5.7         | 6.3          | 76            | 70             | 2.2           | 2.4            |
| 2M            | 811    | 5.7         | X            | 76            | X              | 2.2           | X              |
| 2M            | 812    | 6.0         | X            | 44            | X              | 2.3           | X              |
| 2M            | 813    | 6.0         | X            | 137           | X              | 2.4           | X              |
| 2M            | 814    | 5.8         | X            | 77            | X              | 2.2           | X              |
| 2M            | 815    | 5.8         | X            | 84            | X              | 2.2           | X              |
| 2M            | 816    | -           | 6.0          | -             | 113            | -             | 2.4            |
| 2M            | 817    | -           | 6.0          | -             | 86             | -             | 2.3            |
| 2M            | 818    | -           | 6.3          | -             | 102            | -             | 2.5            |
| 2M            | 819    | -           | 6.2          | -             | 56             | -             | 2.4            |
| 2M            | 820    | -           | 6.4          | -             | 61             | -             | 2.4            |
| 2M            | Mn:    | 5.9         | 6.2          | 84            | 84             | 2.3           | 2.4            |

BASi Study Number: 1327-14292 (SB-SU-003)

Appendix No. 2

**Individual Clinical Chemistry  
Males**

| Animal Number |        | A/G<br>Day 3 | A/G<br>Day 15 |
|---------------|--------|--------------|---------------|
| 1M            | 801    | 1.6          | X             |
| 1M            | 802    | 1.6          | X             |
| 1M            | 803    | 1.6          | X             |
| 1M            | 804    | 1.6          | X             |
| 1M            | 805    | 1.6          | X             |
| 1M            | 806    | -            | 1.6           |
| 1M            | 807    | -            | 1.6           |
| 1M            | 808    | -            | 1.5           |
| 1M            | 809    | -            | 1.6           |
| 1M            | 810    | -            | 1.6           |
| ♀             | 1M Mn: | 1.6          | 1.6           |
| 2M            | 811    | 1.6          | X             |
| 2M            | 812    | 1.6          | X             |
| 2M            | 813    | 1.5          | X             |
| 2M            | 814    | 1.6          | X             |
| 2M            | 815    | 1.6          | X             |
| 2M            | 816    | -            | 1.5           |
| 2M            | 817    | -            | 1.6           |
| 2M            | 818    | -            | 1.5           |
| 2M            | 819    | -            | 1.6           |
| 2M            | 820    | -            | 1.7           |
| 2M            | Mn:    | 1.6          | 1.6           |

BASi Study Number: 1327-14292 (SB-SU-003)

Appendix No. 2

**Individual Clinical Chemistry  
 Females**

| Animal Number |        | NA    |        | K     |        | CL    |        |
|---------------|--------|-------|--------|-------|--------|-------|--------|
|               |        | Day 3 | Day 15 | Day 3 | Day 15 | Day 3 | Day 15 |
| 1F            | 823    | 139   | X      | 5.5   | X      | 103   | X      |
| 1F            | 824    | 142   | X      | 4.2   | X      | 104   | X      |
| 1F            | 825    | 142   | X      | 4.4   | X      | 103   | X      |
| 1F            | 826    | 141   | X      | 4.6   | X      | 103   | X      |
| 1F            | 827    | 142   | X      | 4.7   | X      | 106   | X      |
| 1F            | 828    | -     | 140    | -     | 4.7    | -     | 103    |
| 1F            | 829    | -     | 141    | -     | 4.6    | -     | 104    |
| 1F            | 830    | -     | 140    | -     | 4.2    | -     | 104    |
| 1F            | 831    | -     | 143    | -     | 4.1    | -     | 104    |
| 1F            | 832    | -     | 141    | -     | 4.7    | -     | 104    |
| Ç             | 1F Mn: | 141   | 141    | 4.7   | 4.5    | 104   | 104    |
| 2F            | 833    | 143   | X      | 4.4   | X      | 105   | X      |
| 2F            | 834    | 142   | X      | 4.8   | X      | 106   | X      |
| 2F            | 835    | 142   | X      | 4.8   | X      | 104   | X      |
| 2F            | 836    | 141   | X      | 4.9   | X      | 106   | X      |
| 2F            | 837    | 142   | X      | 4.5   | X      | 104   | X      |
| 2F            | 838    | -     | 141    | -     | 4.3    | -     | 103    |
| 2F            | 839    | -     | 141    | -     | 4.4    | -     | 104    |
| 2F            | 840    | -     | 142    | -     | 4.7    | -     | 107    |
| 2F            | 841    | -     | 142    | -     | 4.3    | -     | 106    |
| 2F            | 842    | -     | 139    | -     | 4.7    | -     | 101    |
| 2F            | Mn:    | 142   | 141    | 4.7   | 4.5    | 105   | 104    |

BASi Study Number: 1327-14292 (SB-SU-003)

Appendix No. 2

**Individual Clinical Chemistry  
Females**

| Animal Number |        | ALB<br>Day 3 | ALB<br>Day 15 | ALP<br>Day 3 | ALP<br>Day 15 | ALT<br>Day 3 | ALT<br>Day 15 |
|---------------|--------|--------------|---------------|--------------|---------------|--------------|---------------|
| 1F            | 823    | 3.5          | X             | 153          | X             | 45           | X             |
| 1F            | 824    | 4.0          | X             | 144          | X             | 42           | X             |
| 1F            | 825    | 3.8          | X             | 148          | X             | 41           | X             |
| 1F            | 826    | 3.9          | X             | 171          | X             | 52           | X             |
| 1F            | 827    | 4.1          | X             | 116          | X             | 38           | X             |
| 1F            | 828    | -            | 3.9           | -            | 122           | -            | 56            |
| 1F            | 829    | -            | 3.8           | -            | 122           | -            | 72            |
| 1F            | 830    | -            | 4.0           | -            | 156           | -            | 53            |
| 1F            | 831    | -            | 3.7           | -            | 93            | -            | 50            |
| 1F            | 832    | -            | 3.9           | -            | 123           | -            | 50            |
| Ç             | 1F Mn: | 3.9          | 3.9           | 146          | 123           | 44           | 56            |
| 2F            | 833    | 3.6          | X             | 123          | X             | 51           | X             |
| 2F            | 834    | 3.9          | X             | 162          | X             | 60           | X             |
| 2F            | 835    | 3.8          | X             | 133          | X             | 43           | X             |
| 2F            | 836    | 3.9          | X             | 184          | X             | 47           | X             |
| 2F            | 837    | 3.8          | X             | 126          | X             | 53           | X             |
| 2F            | 838    | -            | 3.8           | -            | 128           | -            | 63            |
| 2F            | 839    | -            | 4.3           | -            | 143           | -            | 53            |
| 2F            | 840    | -            | 3.8           | -            | 126           | -            | 53            |
| 2F            | 841    | -            | 3.7           | -            | 147           | -            | 49            |
| 2F            | 842    | -            | 3.9           | -            | 161           | -            | 69            |
| 2F            | Mn:    | 3.8          | 3.9           | 146          | 141           | 51           | 57            |



BASi Study Number: 1327-14292 (SB-SU-003)

Appendix No. 2

**Individual Clinical Chemistry  
 Females**

| Animal Number |        | AST<br>Day 3 | AST<br>Day 15 | BUN<br>Day 3 | BUN<br>Day 15 | CA<br>Day 3 | CA<br>Day 15 |
|---------------|--------|--------------|---------------|--------------|---------------|-------------|--------------|
| 1F            | 823    | 123          | X             | 19           | X             | 9.6         | X            |
| 1F            | 824    | 97           | X             | 15           | X             | 9.9         | X            |
| 1F            | 825    | 102          | X             | 16           | X             | 9.7         | X            |
| 1F            | 826    | 99           | X             | 20           | X             | 10.2        | X            |
| 1F            | 827    | 95           | X             | 29           | X             | 9.9         | X            |
| 1F            | 828    | -            | 127           | -            | 21            | -           | 9.8          |
| 1F            | 829    | -            | 118           | -            | 21            | -           | 9.7          |
| 1F            | 830    | -            | 102           | -            | 22            | -           | 9.8          |
| 1F            | 831    | -            | 97            | -            | 18            | -           | 9.6          |
| 1F            | 832    | -            | 115           | -            | 20            | -           | 9.7          |
| ♀             | 1F Mn: | 103          | 112           | 20           | 20            | 9.9         | 9.7          |
| 2F            | 833    | 125          | X             | 20           | X             | 9.5         | X            |
| 2F            | 834    | 108          | X             | 17           | X             | 9.8         | X            |
| 2F            | 835    | 109          | X             | 19           | X             | 9.7         | X            |
| 2F            | 836    | 107          | X             | 19           | X             | 9.8         | X            |
| 2F            | 837    | 102          | X             | 23           | X             | 9.7         | X            |
| 2F            | 838    | -            | 111           | -            | 20            | -           | 9.9          |
| 2F            | 839    | -            | 110           | -            | 21            | -           | 10.1         |
| 2F            | 840    | -            | 109           | -            | 22            | -           | 9.6          |
| 2F            | 841    | -            | 100           | -            | 21            | -           | 9.7          |
| 2F            | 842    | -            | 119           | -            | 21            | -           | 10.0         |
| 2F            | Mn:    | 110          | 110           | 20           | 21            | 9.7         | 9.9          |

BASi Study Number: 1327-14292 (SB-SU-003)

Appendix No. 2

**Individual Clinical Chemistry  
 Females**

| Animal Number |        | CHOL<br>Day 3 | CHOL<br>Day 15 | CRE<br>Day 3 | CRE<br>Day 15 | GGT<br>Day 3 | GGT<br>Day 15 |
|---------------|--------|---------------|----------------|--------------|---------------|--------------|---------------|
| 1F            | 823    | 117           | X              | .26          | X             | 8<           | X             |
| 1F            | 824    | 156           | X              | .25          | X             | 8<           | X             |
| 1F            | 825    | 113           | X              | .21          | X             | 8<           | X             |
| 1F            | 826    | 122           | X              | .24          | X             | 8<           | X             |
| 1F            | 827    | 141           | X              | .42          | X             | 8<           | X             |
| 1F            | 828    | -             | 89             | -            | .36           | -            | 8<            |
| 1F            | 829    | -             | 106            | -            | .32           | -            | 8<            |
| 1F            | 830    | -             | 124            | -            | .34           | -            | 8<            |
| 1F            | 831    | -             | 103            | -            | .30           | -            | 8<            |
| 1F            | 832    | -             | 108            | -            | .30           | -            | 8<            |
| ♀             | 1F Mn: | 130           | 106            | .28          | .32           | 8            | 8             |
| 2F            | 833    | 130           | X              | .30          | X             | 8<           | X             |
| 2F            | 834    | 136           | X              | .27          | X             | 8<           | X             |
| 2F            | 835    | 132           | X              | .24          | X             | 8<           | X             |
| 2F            | 836    | 134           | X              | .29          | X             | 8<           | X             |
| 2F            | 837    | 126           | X              | .27          | X             | 8<           | X             |
| 2F            | 838    | -             | 113            | -            | .31           | -            | 8<            |
| 2F            | 839    | -             | 121            | -            | .35           | -            | 8<            |
| 2F            | 840    | -             | 109            | -            | .42           | -            | 8<            |
| 2F            | 841    | -             | 109            | -            | .31           | -            | 8<            |
| 2F            | 842    | -             | 128            | -            | .32           | -            | 8<            |
| 2F            | Mn:    | 132           | 116            | .27          | .34           | 8            | 8             |

BASi Study Number: 1327-14292 (SB-SU-003)

Appendix No. 2

**Individual Clinical Chemistry  
Females**

| Animal Number |        | GLU<br>Day 3 | GLU<br>Day 15 | PHOS<br>Day 3 | PHOS<br>Day 15 | TBIL<br>Day 3 | TBIL<br>Day 15 |
|---------------|--------|--------------|---------------|---------------|----------------|---------------|----------------|
| 1F            | 823    | 104          | X             | 7.4           | X              | .05           | X              |
| 1F            | 824    | 84           | X             | 6.7           | X              | .05           | X              |
| 1F            | 825    | 80           | X             | 6.6           | X              | .06           | X              |
| 1F            | 826    | 82           | X             | 8.0           | X              | .05           | X              |
| 1F            | 827    | 89           | X             | 7.5           | X              | .06           | X              |
| 1F            | 828    | -            | 110           | -             | 7.2            | -             | .11            |
| 1F            | 829    | -            | 105           | -             | 6.0            | -             | .09            |
| 1F            | 830    | -            | 98            | -             | 6.5            | -             | .11            |
| 1F            | 831    | -            | 84            | -             | 5.9            | -             | .09            |
| 1F            | 832    | -            | 98            | -             | 6.1            | -             | .09            |
| Ç             | 1F Mn: | 88           | 99            | 7.2           | 6.3            | .05           | .10            |
| 2F            | 833    | 114          | X             | 7.6           | X              | .05           | X              |
| 2F            | 834    | 128          | X             | 6.9           | X              | .05           | X              |
| 2F            | 835    | 83           | X             | 6.8           | X              | .06           | X              |
| 2F            | 836    | 112          | X             | 7.5           | X              | .05           | X              |
| 2F            | 837    | 94           | X             | 7.4           | X              | .05           | X              |
| 2F            | 838    | -            | 98            | -             | 7.1            | -             | .09            |
| 2F            | 839    | -            | 91            | -             | 5.9            | -             | .10            |
| 2F            | 840    | -            | 122           | -             | 5.9            | -             | .09            |
| 2F            | 841    | -            | 93            | -             | 6.3            | -             | .06            |
| 2F            | 842    | -            | 109           | -             | 7.4            | -             | .08            |
| 2F            | Mn:    | 106          | 103           | 7.2           | 6.5            | .05           | .08            |

BASi Study Number: 1327-14292 (SB-SU-003)

Appendix No. 2

**Individual Clinical Chemistry  
 Females**

| Animal Number |        | TP<br>Day 3 | TP<br>Day 15 | TRIG<br>Day 3 | TRIG<br>Day 15 | GLOB<br>Day 3 | GLOB<br>Day 15 |
|---------------|--------|-------------|--------------|---------------|----------------|---------------|----------------|
| 1F            | 823    | 5.6         | X            | 80            | X              | 2.1           | X              |
| 1F            | 824    | 6.4         | X            | 42            | X              | 2.4           | X              |
| 1F            | 825    | 6.1         | X            | 59            | X              | 2.3           | X              |
| 1F            | 826    | 6.2         | X            | 47            | X              | 2.3           | X              |
| 1F            | 827    | 6.5         | X            | 45            | X              | 2.4           | X              |
| 1F            | 828    | -           | 6.3          | -             | 32             | -             | 2.4            |
| 1F            | 829    | -           | 6.1          | -             | 59             | -             | 2.3            |
| 1F            | 830    | -           | 6.4          | -             | 37             | -             | 2.4            |
| 1F            | 831    | -           | 5.9          | -             | 56             | -             | 2.2            |
| 1F            | 832    | -           | 6.2          | -             | 37             | -             | 2.3            |
| Ç             | 1F Mn: | 6.2         | 6.2          | 55            | 44             | 2.3           | 2.3            |
| 2F            | 833    | 5.8         | X            | 53            | X              | 2.2           | X              |
| 2F            | 834    | 6.1         | X            | 32            | X              | 2.2           | X              |
| 2F            | 835    | 6.1         | X            | 47            | X              | 2.3           | X              |
| 2F            | 836    | 6.2         | X            | 26            | X              | 2.3           | X              |
| 2F            | 837    | 6.1         | X            | 45            | X              | 2.3           | X              |
| 2F            | 838    | -           | 6.5          | -             | 41             | -             | 2.7            |
| 2F            | 839    | -           | 6.7          | -             | 81             | -             | 2.4            |
| 2F            | 840    | -           | 6.1          | -             | 40             | -             | 2.3            |
| 2F            | 841    | -           | 6.0          | -             | 76             | -             | 2.3            |
| 2F            | 842    | -           | 6.3          | -             | 83             | -             | 2.4            |
| 2F            | Mn:    | 6.1         | 6.3          | 41            | 64             | 2.3           | 2.4            |

BASi Study Number: 1327-14292 (SB-SU-003)

Appendix No. 2

**Individual Clinical Chemistry  
Females**

| Animal Number | A/G<br>Day 3 | A/G<br>Day 15 |
|---------------|--------------|---------------|
| 1F 823        | 1.7          | X             |
| 1F 824        | 1.7          | X             |
| 1F 825        | 1.7          | X             |
| 1F 826        | 1.7          | X             |
| 1F 827        | 1.7          | X             |
| 1F 828        | -            | 1.6           |
| 1F 829        | -            | 1.7           |
| 1F 830        | -            | 1.7           |
| 1F 831        | -            | 1.7           |
| 1F 832        | -            | 1.7           |
| ♀ 1F Mn:      | 1.7          | 1.7           |
| 2F 833        | 1.6          | X             |
| 2F 834        | 1.8          | X             |
| 2F 835        | 1.7          | X             |
| 2F 836        | 1.7          | X             |
| 2F 837        | 1.7          | X             |
| 2F 838        | -            | 1.4           |
| 2F 839        | -            | 1.8           |
| 2F 840        | -            | 1.7           |
| 2F 841        | -            | 1.6           |
| 2F 842        | -            | 1.6           |
| 2F Mn:        | 1.7          | 1.6           |

BASi Study Number: 1327-14292 (SB-SU-003)

Appendix No. 3

---

## Report Amendment

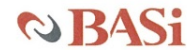

## REPORT AMENDMENT 1

**1 IDENTIFYING INFORMATION FOR AMENDMENT**

Amendment Number: 1  
Amendment Date: 04 February 2015  
Principal Investigator: Thea Riggs

**2 IDENTIFYING INFORMATION FOR ORIGINAL DOCUMENT**

Document Number: 1327-14292  
Document Type: GLP Report  
Document Date: 24 November 2014  
Original Protocol Title: Clinical Pathology Evaluation for 14-Day Single  
Intravenous Dose Toxicity Study of [<sup>18</sup>F]FP-R01-MG-F2  
in Sprague Dawley Rats  
Amended Protocol Title: Clinical Pathology Evaluation for 14-Day Single  
Intravenous Dose Toxicity Study of [<sup>19</sup>F]FP-R<sub>0</sub>1-MG-F2 in  
Sprague Dawley Rats

These changes are for a correction of the test article name following finalization of the original report. The content of the amended report was reviewed by the BASi Quality Assurance Manager and Management and found to accurately reflect the original report.

**3 CHANGES TO REPORT****Report Section: Title Page**

**Revision:** Change "Final Report" to "Amended Final Report."

**Revision:** Add "Report Amendment #1 Completion: 04 February 2015" as last line of title page.

**Revision:** Change title of report to "Clinical Pathology Evaluation for 14-Day Single Intravenous Dose Toxicity Study of [<sup>19</sup>F]FP-R<sub>0</sub>1-MG-F2 in Sprague Dawley Rats."

**Reason for Change:** Report amended to change test article name.

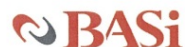**Report Section: Table of Contents and Appendix 3**

**Revision:** Add Appendix 3 Report Amendment to report and to Table of Contents.

**Reason for Change:** Inclusion of report amendment

**Report Section: Quality Assurance Statement**

**Revision:** Change title of study to "Clinical Pathology Evaluation for 14-Day Single Intravenous Dose Toxicity Study of [<sup>19</sup>F]FP-R<sub>0</sub>1-MG-F2 in Sprague Dawley Rats."

**Reason for Change:** Report amended to change test article name.

**Report Section: Report Title, Page 1**

**Revision:** Replace [18F]FP-R01-MG-F2 with [<sup>19</sup>F]FP-R<sub>0</sub>1-MG-F2 in the report title.

**Reason for Change:** Report amended to change test article name.

**Report Section: 4.0 Study Design**

**Revision:** Replace [18F]FP-R01-MG-F2 with [<sup>19</sup>F]FP-R<sub>0</sub>1-MG-F2 in the first and second sentences of the section.

**Reason for Change:** Report amended to change test article name.

**4 INSTRUCTIONS**

Please replace cover page, Table of Contents, and amended pages with the pages included in this amendment. Please add this amendment and its cover page to be Appendix 3. Original pages should be placed after this page in Appendix 3.





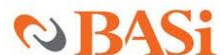

**FINAL REPORT**

**CLINICAL PATHOLOGY EVALUATION FOR 14-DAY SINGLE  
INTRAVENOUS DOSE TOXICITY STUDY OF [18F]FP-R01-MG-F2 IN  
SPRAGUE DAWLEY RATS**

**TEST SITE**

BASi  
10424 Middle Mt. Vernon Road  
Mt. Vernon, IN 47620

**BASI PROJECT NUMBER**

1327-14292

**SOBRAN STUDY NUMBER**

SB-SU-003

**SPONSOR**

Stanford University School of Medicine  
1201 Welch Road, Room PS049  
Stanford, CA 94305-5484

**PRINCIPAL INVESTIGATOR**

T.A. Riggs AS, MLT (ASCP)

Report Completion: 24 November 2014

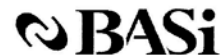

BASi Project Number: 1327-14292 (SB-SU-003)

**QUALITY ASSURANCE STATEMENT**

Study Title           Clinical Pathology Evaluation for 14-Day Single Intravenous  
Dose Toxicity Study of [18F]FP-R01-MG-F2 in Sprague Dawley  
Rats

BASi Project No.   1327-14292

In accordance with BASi policy and quality assurance procedures for Good  
Laboratory Practice (GLP), this project has been audited and the conduct of this  
study has been inspected as follows:

| <b>Date of Inspection</b> | <b>Inspection</b>                                                    | <b>Date Reported to Study<br/>Director &amp; Management</b> |
|---------------------------|----------------------------------------------------------------------|-------------------------------------------------------------|
| 10 October 2014           | Sample Receipt; Hematology<br>Evaluation; Wedge Smear<br>Preparation | 10 October 2014                                             |
| 18 November 2014          | Data; Draft under Circulation for<br>Review and Comment              | 19 November 2014                                            |
| 24 November 2014          | Final Report                                                         | 24 November 2014                                            |

**Quality Assurance Unit**  
Sandra J. Fox, BS, RQAP-GLP  
Quality Assurance Manager  
BASi

*Sandra J. Fox* 24 NOV 14  
Signature   Date

BASi Project Number: 1327-14292 (SB-SU-003)

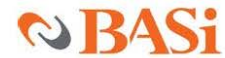

## TABLE OF CONTENTS

|                                                    |     |
|----------------------------------------------------|-----|
| Signatures.....                                    | i   |
| Statement of Regulatory Compliance .....           | ii  |
| Quality Assurance Statement .....                  | iii |
| Table of Contents .....                            | iv  |
| 1. Test Site.....                                  | 1   |
| 2. Principal Investigator.....                     | 1   |
| 3. Personnel.....                                  | 1   |
| 4. Study Design.....                               | 1   |
| 5. Blood Sample Collection and Storage .....       | 2   |
| 5.1. Hematology.....                               | 2   |
| 5.2. Coagulation.....                              | 3   |
| 5.3. Clinical Chemistry .....                      | 3   |
| 6. Data Acquisition and Statistical Analysis ..... | 3   |
| 6.1. Data Acquisition.....                         | 3   |
| 6.2. Statistical Analysis .....                    | 3   |
| 7. Data and Specimen Retention.....                | 3   |
| 8. References .....                                | 4   |

### Tables:

- 1 - Summary of Hematology and Coagulation
- 2 - Summary of Clinical Chemistry

### Appendices:

- 1 - Individual Hematology and Coagulation
- 2 - Individual Clinical Chemistry

BASi Project Number: 1327-14292 (SB-SU-003)

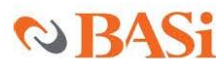

**Clinical Pathology Evaluation for 14-Day Single Intravenous Dose Toxicity Study of [18F]FP-R01-MG-F2 in Sprague Dawley Rats**

**1. TEST SITE**

BASi  
10424 Middle Mt. Vernon Road  
Mt. Vernon, IN 47620 USA

**2. PRINCIPAL INVESTIGATOR**

T.A. Riggs AS, MLT (ASCP)  
BASi  
Phone: 812.985.5900 ext. 1122  
Fax: 812.985.3403  
Email: [tariqgs@basinc.com](mailto:tariqgs@basinc.com)

**3. PERSONNEL**

Sr. Director, Preclinical Services  
P. A. Downing, BA  
  
Director of Toxicology  
L.D. Hopper, DVM, PhD, DABT, RQAP-GLP  
  
Clinical Pathology Coordinator  
T.A. Riggs AS, MLT (ASCP)  
  
Quality Assurance Manager  
S. J. Fox, BS, RQAP-GLP

**4. STUDY DESIGN**

The goal of this study was to assess the toxicity of [18F]FP-R01-MG-F2 a small molecule (peptide) that is administered with a specific radioactive probe during Positron Emission Tomography (PET) scans to visualize tumors or targeted cells. For this study the toxicity of [18F]FP-R01-MG-F2 (note - small molecule only, no radioactive component) was assessed following a single intravenous (IV) dose of 1.10 mg/kg (250x the clinical dose) of the test article. The vehicle (10% ethanol in normal saline) was also tested to establish baseline toxicity.

Randomized animals were placed in the following groups:

| Group Number | Dose Level           | Dose Concentration | Dose Volume | Dosing Route | Total # of Animals | Day 3 Cohort | Day 15 Cohort |
|--------------|----------------------|--------------------|-------------|--------------|--------------------|--------------|---------------|
| 1            | 0.00 mg/kg (Vehicle) | 0.00 mg/ml         | 5 ml/kg     | IV           | 10M<br>10F         | 5M<br>5F     | 5M<br>5F      |
| 2            | 1.10 mg/kg           | 0.22 mg/ml         | 5 ml/kg     | IV           | 10M<br>10F         | 5M<br>5F     | 5M<br>5F      |

## **APPENDIX C – PATHOLOGY REPORT**

# HSRL

Histo-Scientific Research Laboratories

## FINAL REPORT AMENDMENT RECORD

|                                                                                                                                         |                               |                         |
|-----------------------------------------------------------------------------------------------------------------------------------------|-------------------------------|-------------------------|
| <b>Study Number:</b><br>SB-SU-003                                                                                                       | <b>Amendment Number:</b><br>1 | <b>Date:</b><br>20Feb15 |
| <b>Study Title:</b> 14-Day Single Intravenous Dose Toxicity Study of [ <sup>19</sup> F]FP-R <sub>0</sub> 1-MG-F2 in Sprague Dawley Rats |                               |                         |

**This Amendment records a:**

- Modification of Final Report [Addition(s) and/or Deletion(s)]**  
 **Replacement of Final Report**

**Date of Final Report:** 5Dec14

**Amendment(s):**

**Subject:** Final Pathology Report

Throughout the Final Pathology Report “[18F]FP-R01-MG-F2” will be replaced by “[<sup>19</sup>F]FP-R<sub>0</sub>1-MG-F2”.

**Reason for Amendment:** Revision of test article name as per Protocol Amendment 1

**Approving Signatures:**

20FEB2015  
Date

  
Study Pathologist

23Feb15  
Date

  
Quality Assurance

# HSRL HistoScientific Research Laboratories

## QUALITY ASSURANCE STATEMENT

Study Title: 14-Day Single Intravenous Dose Toxicity Study of [<sup>18</sup>F]FP-R<sub>0</sub>1-MG-F2 in Sprague Dawley Rats

Client Study Number: SB-SU-003

This histopathology project has been inspected and audited by the HSRL Quality Assurance Unit (QAU) as required by the Good Laboratory Practice (GLP) regulations disseminated by the U.S. Food and Drug Administration (FDA, 21 CFR 58).

| <u>Area Inspected</u>          |             | <u>Dates</u>                  |                             |                             |
|--------------------------------|-------------|-------------------------------|-----------------------------|-----------------------------|
|                                |             | <u>Inspection<sup>1</sup></u> | <u>Reported<sup>2</sup></u> | <u>Reported<sup>3</sup></u> |
| Critical Phase:                | Embedding   | 05NOV14                       | 11NOV14                     | 11NOV14                     |
| Data Review                    |             | 07,10-11NOV14                 | 17NOV14                     | 17NOV14                     |
| Pathology Report:              | Draft       | 19-20NOV14                    | 21NOV14                     | 21NOV14                     |
|                                | Final       | 04-05DEC14                    | 05DEC14                     | 05DEC14                     |
| Amended Final Pathology Report |             |                               |                             |                             |
|                                | Amendment 1 | 19FEB15                       | 20FEB15                     | 20FEB15                     |

All the results/conclusions of the pathology report accurately reflect the raw data.

<sup>1</sup> Date(s) of inspection

<sup>2</sup> Date(s) inspections reported to HSRL Laboratory Director/Test Site Management, Principal Investigator/HSRL Study Pathologist

<sup>3</sup> Date(s) inspections reported to Study Director, Test Facility Management, and Lead QA (if appropriate)

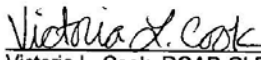  
Victoria L. Cook, RQAP-GLP  
Quality Assurance Auditor

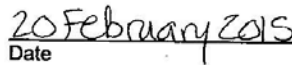  
Date



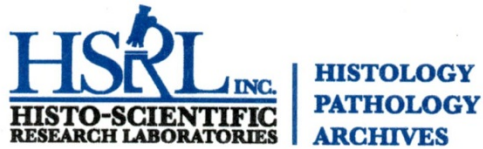

**PATHOLOGY REPORT**

**14-DAY SINGLE INTRAVENOUS DOSE TOXICITY STUDY OF [18F]FP-R01-MG-F2 IN  
SPRAGUE DAWLEY RATS**

**SoBran Study Number SB-SU-003**

**Prepared by**

HSRL  
Histo-Scientific Research Laboratories  
5930 Main Street  
Mount Jackson, VA 22842

**Testing Facility**

SoBran Rangos Animal Facility  
855 N. Wolfe Street, Suite 622  
Baltimore, MD 21205

**Sponsor**

Stanford University School of Medicine  
1201 Welch Road, Rm PS049  
Stanford, CA 94305-5484

December 5, 2014

---

5930 Main Street  
Mt. Jackson, VA 22842

540.477.4440 phone  
540.477.4448 fax

[www.hsrl.org](http://www.hsrl.org)

## TABLE OF CONTENTS

|            |                                                          |    |
|------------|----------------------------------------------------------|----|
| <b>1.0</b> | <b>Executive Summary</b> .....                           | 3  |
| <b>2.0</b> | <b>Introduction</b> .....                                | 4  |
| 2.1        | Protocol .....                                           | 4  |
| 2.2        | Objective .....                                          | 4  |
| <b>3.0</b> | <b>Methods</b> .....                                     | 4  |
| 3.1        | Compliance Statement .....                               | 4  |
| 3.2        | Study Design .....                                       | 4  |
|            | <b>Table 1. Group Assignments</b> .....                  | 4  |
| 3.3        | Necropsy .....                                           | 4  |
| 3.4        | Histological Processing .....                            | 5  |
| <b>4.0</b> | <b>Results</b> .....                                     | 5  |
| 4.1        | Animal Mortality .....                                   | 5  |
| 4.2        | Macroscopic Observations .....                           | 5  |
| 4.3        | Microscopic Evaluation .....                             | 5  |
| <b>5.0</b> | <b>Conclusion</b> .....                                  | 6  |
|            | <b>Appendix A. Histopathology Incidence Tables</b> ..... | 7  |
|            | <b>Appendix B. Quality Assurance Statement</b> .....     | 62 |

## 1.0 Executive Summary

The goal of this study was to assess the toxicity of [18F]FP-R01-MG-F2 a small molecule (peptide) that is administered with a specific radioactive probe during Positron Emission Tomography (PET) scans to visualize tumors or targeted cells. For this study the toxicity of [18F]FP-R01-MG-F2 (note- small molecule only, no radioactive component) was assessed following a single intravenous (IV) dose of 1.10 mg/kg (250x the clinical dose) of the test article. The vehicle (10% ethanol in normal saline) was also tested to establish baseline toxicity.

**Methods:** According to the protocol, 40 rats (20 male and 20 female) were assigned to two treatment groups for this study. Animals were dosed once via intravenous injection. On Day 3, five animals per sex per group were euthanized, while surviving animals remained on study untreated and were terminated on Day 15. All animals at both time points were subjected to a comprehensive necropsy. Protocol specified tissues were collected and forwarded to HSRL where tissues from all animals from both time points were processed, embedded in paraffin, sectioned and stained with hematoxylin and eosin (H&E). The resulting slides were evaluated via light microscopy by David S. Garlick, DVM, DACVP at HSRL.

**Conclusion:** The goal of this study was to assess the toxicity of [18F]FP-R01-MG-F2 a small molecule (peptide) that is administered with a specific radioactive probe during Positron Emission Tomography (PET) scans to visualize tumors or targeted cells. For this study the toxicity of [18F]FP-R01-MG-F2 (note- small molecule only, no radioactive component) was assessed following a single intravenous (IV) dose of 1.10 mg/kg (250x the clinical dose) of the test article. The vehicle (10% ethanol in normal saline) was also tested to establish baseline toxicity.

Under the conditions of this study, there were no microscopic findings in the tissues evaluated related to the single dose intravenous administration of [18F]FP-R01-MG-F2 at 1.10 mg/kg. Additionally, there were no microscopic findings related to administration of the vehicle, 10% ethanol in normal saline.

## 2.0 Introduction

### 2.1 Protocol

This report presents the histopathology results of a toxicity study of [18F]FP-R01-MG-F2 administered via a single intravenous dose to rats, SoBran Study Number SB-SU-003, Stanford University School of Medicine, Stanford, CA. All in-life procedures and tissue harvests were performed at SoBran Rangos Animal Facility under the direction of Adrienne Edgell, BS, CMAR, LATG, Study Director. Histology was performed at HSRL and microscopic evaluation was completed by David S. Garlick, DVM, DACVP at HSRL.

### 2.2 Objective

The goal of this study was to assess the toxicity of [18F]FP-R01-MG-F2 a small molecule (peptide) that is administered with a specific radioactive probe during Positron Emission Tomography (PET) scans to visualize tumors or targeted cells. For this study the toxicity of [18F]FP-R01-MG-F2 (note- small molecule only, no radioactive component) was assessed following a single intravenous (IV) dose of 1.10 mg/kg (250x the clinical dose) of the test article. The vehicle (10% ethanol in normal saline) was also tested to establish baseline toxicity.

## 3.0 Methods

### 3.1 Compliance Statement

The portions of this study conducted at HSRL were conducted in compliance with the Good Laboratory Practice Regulations 21 CFR Part 58. An electronic copy of this report in portable document format (PDF) will be provided to SoBran in addition to the hard copy. The PDF is a representation of the pathology report hard copy. However, only the signed hard copy of the pathology report is considered raw data.

### 3.2 Study Design

According to the protocol, 40 animals (20 male and 20 female) assigned to two treatment groups were enrolled in this study. The study design is further described in Table 1.

**Table 1. Group Assignments**

| Group Number | Dose Level          | Dose Concentration | Dose Volume | Dosing Route | Total Number of Animals | Day 3 Cohort       | Day 15 Cohort      |
|--------------|---------------------|--------------------|-------------|--------------|-------------------------|--------------------|--------------------|
| 1            | 0.0 mg/kg (Vehicle) | 0.0 mg/ml          | 5 ml/kg     | Intravenous  | 10 male<br>10 female    | 5 male<br>5 female | 5 male<br>5 female |
| 2            | 1.10 mg/kg          | 0.22 mg/ml         | 5 ml/kg     | Intravenous  | 10 male<br>10 female    | 5 male<br>5 female | 5 male<br>5 female |

### 3.3 Necropsy

On Day 3, five animals per sex per group were euthanized, while the surviving animals remained on study and were terminated on Day 15. All animals at both time points were subjected to a comprehensive necropsy. The following organs (when present) were weighed before fixation, with paired organs weighed together: brain, eyes with optic nerves, heart, kidneys, liver, lung, ovaries, spleen, testes, and thyroid with parathyroid. The following tissues from all animals were preserved in 10% neutral buffered formalin (except for the eyes, optic nerves, and testes which were preserved in modified Davidson's fixative):

Final Pathology Report  
Stanford University School of Medicine  
SoBran Study Number SB-SU-003

|                             |                                   |
|-----------------------------|-----------------------------------|
| Brain*                      | Lungs*                            |
| Cecum*                      | Lymph nodes (mesenteric)*         |
| Colon*                      | Ovaries (2) (females)*            |
| Eyes with optic nerves (2)* | Remaining carcass                 |
| Heart*                      | Salivary glands [mandibular (2)]* |
| Ileum*                      | Spleen*                           |
| Injection site*             | Testes (2) (males)*               |
| Kidneys (2)*                | Thyroid with parathyroid (2)*     |
| Lesions (if present)*       | Trachea*                          |
| Liver*                      | Urinary bladder*                  |

\* For histopathological evaluation

### 3.4 Histological Processing

Collected tissues were forwarded to HSRL where protocol required tissues from all animals from both time points were processed, embedded in paraffin, sectioned and stained with hematoxylin and eosin (H&E). Animal information from SoBran-Rangos Individual Animal Necropsy Records was entered into PathData<sup>®</sup> Systems (PDS) at HSRL. All microscopic slides were evaluated by David S. Garlick, DVM, DACVP and entered directly into PDS at HSRL. Microscopic findings and microscopic grading definitions are presented in the Histopathology Incidence Tables portion of this report, where the following abbreviations apply due to PDS character limitations:

AOFT= Animal Organ Finding Table  
 INJECTION SITE= Injection site (tail)  
 I.V.= Intravenous  
 LYMPH NODE: MESENT.= Lymph node: mesenteric  
 RAT (Spr. Dawl.)= Rat (Sprague Dawley)  
 SALIVARY GLANDS= Salivary glands (mandibular)  
 Stanford University School= Stanford University School of Medicine

## 4.0 Results

### 4.1 Animal Mortality

There were no early deaths among the animals submitted to HSRL for histopathological evaluation.

### 4.2 Macroscopic Observations

There were no macroscopic observations reported by the Testing Facility.

### 4.3 Microscopic Evaluation

*Injection sites:* At Day 3, slight perivascular inflammation was noted at the injection sites in a single Group 1 vehicle male (Animal 801) and a single Group 2 test article female (Animal 836). This finding was characterized by the presence of minor macrophage and neutrophil infiltrates around tail veins used for treatment. The low incidence and intensity of this change was consistent with those that can be induced as a result of tissue trauma at the time of intravenous tail vein injections.

(Note: tail vein injection sites from Day 15 were not evaluated due to suboptimal tissue preservation.)

*Systemic tissues:* Additional tissues evaluated from males and females at Day 3 and Day 15 included brain, cecum, colon, eyes with optic nerves, heart, ileum, kidneys, liver, lungs,

Final Pathology Report  
Stanford University School of Medicine  
SoBran Study Number SB-SU-003

mandibular salivary glands, mesenteric lymph nodes, ovaries (females), spleen, testes (males), thyroid gland with parathyroid gland, trachea, and urinary bladder.

At both Day 3 and Day 15, there were no microscopic findings in these tissues related to either the administration of the test article, [18F]FP-R01-MG-F2, or the vehicle, 10% ethanol in normal saline. At both time points, microscopic observations in systemic tissues were of sporadic intensity and no incidence patterns/trends to suggest a relationship to the administration of test article and they were incidental as can be observed in rats used in this study (McInnes, 2012).

#### 5.0 Conclusion

The goal of this study was to assess the toxicity of [18F]FP-R01-MG-F2 a small molecule (peptide) that is administered with a specific radioactive probe during Positron Emission Tomography (PET) scans to visualize tumors or targeted cells. For this study the toxicity of [18F]FP-R01-MG-F2 (note- small molecule only, no radioactive component) was assessed following a single intravenous (IV) dose of 1.10 mg/kg (250x the clinical dose) of the test article. The vehicle (10% ethanol in normal saline) was also tested to establish baseline toxicity.

Under the conditions of this study, there were no microscopic findings in the tissues evaluated related to the single dose intravenous administration of [18F]FP-R01-MG-F2 at 1.10 mg/kg. Additionally, there were no microscopic findings related to administration of the vehicle, 10% ethanol in normal saline.

Signature:

  
\_\_\_\_\_  
David S. Garlick, DVM, DACVP  
Study Pathologist  
\_\_\_\_\_  
Date

#### Reference

McInnes EF. *Background Lesions in Laboratory Animals, A Color Atlas*. Edinburgh: Saunders Elsevier, 2012.

Final Pathology Report  
Stanford University School of Medicine  
SoBran Study Number SB-SU-003**Appendix A. Histopathology Incidence Tables**

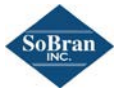

PATHOLOGY REPORT

PROJECT :SB-SU-003

---

|             |                               |                 |             |
|-------------|-------------------------------|-----------------|-------------|
| TEST ITEM   | : [18F]FP-R01-MG-F2           | PATHOL. NO.:    | 14041 DSG   |
| TEST SYSTEM | : RAT(SPR.DAWL.), 1 Day, I.V. | DATE            | : 05-DEC-14 |
| SPONSOR     | : Stanford University School  | PATHDATA SYSTEM | V6.2c2      |

---

AUTHENTICATION

I, the undersigned, hereby declare that the histopathology data in this report were compiled by me, and that they reflect accurately the primary data records.

 05DEC2014

David Garlick  
Pathologist

HSRL  
5930 Main Street  
Mount Jackson, VA 22842



PATHOLOGY REPORT

PROJECT :SB-SU-003

---

|             |                               |                 |             |
|-------------|-------------------------------|-----------------|-------------|
| TEST ITEM   | : [18F]FP-R01-MG-F2           | PATHOL. NO.:    | 14041 DSG   |
| TEST SYSTEM | : RAT(SPR.DAWL.), 1 Day, I.V. | DATE            | : 05-DEC-14 |
| SPONSOR     | : Stanford University School  | PATHDATA SYSTEM | V6.2c2      |

---

EXPLANATION OF CODES AND SYMBOLS

---

CODES AND SYMBOLS USED AT ANIMAL LEVEL:

---

M = Male animal  
 F = Female animal  
 K0 = Terminal sacrifice group  
 R1...R9 = Recovery / post-treatment group 1...9

CODES AND SYMBOLS USED AT ORGAN LEVEL:

---

A = Severe autolysis, evaluation not possible  
 \* = Comment in text of individual animal data  
 0 = Tissue not present for histologic examination  
 ' = Histologic examination not required  
 + = Organ examined, findings present  
 - = Organ examined, no pathologic findings noted (AOFT only)  
 ( = Only one of paired organs examined/present

CODES AND SYMBOLS USED AT FINDING LEVEL:

---

GRADE 1 = Minimal / very few / very small  
 GRADE 2 = Slight / few / small  
 P = Finding present, severity not scored  
 ( = Finding unilateral in paired organs

EXPLANATION OF TABLE TEXT(S) USED AT FINDING LEVEL:

---

HEART  
 - Mononuc. cell infil.  
     = Mononuclear cell infiltrates  
 INJECTION SITE (TAIL)  
 - Inflammation  
     = Inflammation:perivascular  
 LIVER  
 - Mononuc. cell infil.  
     = Mononuclear cell infiltrates  
 SPLEEN  
 - Lymphoid hyperplasia  
     = Lymphoid hyperplasia follicular

PATHOLOGY REPORT  
SUMMARY TABLES

PROJECT :SB-SU-003

|             |                               |                 |             |
|-------------|-------------------------------|-----------------|-------------|
| TEST ITEM   | : [18F]FP-R01-MG-F2           | PATHOL. NO.:    | 14041 DSG   |
| TEST SYSTEM | : RAT(SPR.DAWL.), 1 Day, I.V. | DATE            | : 05-DEC-14 |
| SPONSOR     | : Stanford University School  | PATHDATA SYSTEM | V6.2c2      |

NUMBER OF ANIMALS WITH MICROSCOPIC FINDINGS BY ORGAN/GROUP/SEX  
STATUS AT NECROPSY: K0

|                |   |     |      |
|----------------|---|-----|------|
| SEX            | : |     | MALE |
| DOSE GROUP:    |   | 1 2 |      |
| NO.ANIMALS:    |   | 5 5 |      |
| <hr/>          |   |     |      |
| INJECTION SITE | : | 5 5 |      |
| - Inflammation | : | 1 - |      |
| Grade 2:       |   | 1 - |      |

PATHOLOGY REPORT  
SUMMARY TABLES

PROJECT :SB-SU-003

|             |                               |                 |             |
|-------------|-------------------------------|-----------------|-------------|
| TEST ITEM   | : [18F]FP-R01-MG-F2           | PATHOL. NO.:    | 14041 DSG   |
| TEST SYSTEM | : RAT(SPR.DAWL.), 1 Day, I.V. | DATE            | : 05-DEC-14 |
| SPONSOR     | : Stanford University School  | PATHDATA SYSTEM | V6.2c2      |

NUMBER OF ANIMALS WITH MICROSCOPIC FINDINGS BY ORGAN/GROUP/SEX  
STATUS AT NECROPSY: K0

|                         |   |     |        |
|-------------------------|---|-----|--------|
| SEX                     | : |     | FEMALE |
| DOSE GROUP:             |   | 1 2 |        |
| NO.ANIMALS:             |   | 5 5 |        |
| <hr/>                   |   |     |        |
| INJECTION SITE          | : | 5 5 |        |
| - Inflammation          | : | - 1 |        |
| Grade 2:                |   | - 1 |        |
| <hr/>                   |   |     |        |
| LIVER                   | : | 5 5 |        |
| - Mononuc. cell infil.: |   | 1 - |        |
| Grade 1:                |   | 1 - |        |
| <hr/>                   |   |     |        |
| LUNG                    | : | 5 5 |        |
| - Foreign body embolus: |   | 1 - |        |
| Grade 1:                |   | 1 - |        |
| <hr/>                   |   |     |        |
| THYROID GLAND           | : | 5 5 |        |
| - Ectopic thymus        | : | 1 - |        |

PATHOLOGY REPORT  
SUMMARY TABLES

PROJECT :SB-SU-003

|             |                               |                 |             |
|-------------|-------------------------------|-----------------|-------------|
| TEST ITEM   | : [18F]FP-R01-MG-F2           | PATHOL. NO.:    | 14041 DSG   |
| TEST SYSTEM | : RAT(SPR.DAWL.), 1 Day, I.V. | DATE            | : 05-DEC-14 |
| SPONSOR     | : Stanford University School  | PATHDATA SYSTEM | V6.2c2      |

NUMBER OF ANIMALS WITH MICROSCOPIC FINDINGS BY ORGAN/GROUP/SEX  
STATUS AT NECROPSY: R1

|                         |   |     |      |
|-------------------------|---|-----|------|
| SEX                     | : |     | MALE |
| DOSE GROUP:             |   | 1 2 |      |
| NO.ANIMALS:             |   | 5 5 |      |
| <hr/>                   |   |     |      |
| EYES                    | : | 5 5 |      |
| - Degeneration:cornea   | : | - 1 |      |
| Grade 2:                |   | - 1 |      |
| <hr/>                   |   |     |      |
| HEART                   | : | 5 5 |      |
| - Mononuc. cell infil.: |   | 1 - |      |
| Grade 1:                |   | 1 - |      |
| <hr/>                   |   |     |      |
| LIVER                   | : | 5 5 |      |
| - Mononuc. cell infil.: |   | 1 - |      |
| Grade 1:                |   | 1 - |      |
| <hr/>                   |   |     |      |
| THYROID GLAND           | : | 5 5 |      |
| - Ectopic thymus        | : | - 2 |      |

PATHOLOGY REPORT  
SUMMARY TABLES

PROJECT :SB-SU-003

|             |                               |                 |             |
|-------------|-------------------------------|-----------------|-------------|
| TEST ITEM   | : [18F]FP-R01-MG-F2           | PATHOL. NO.:    | 14041 DSG   |
| TEST SYSTEM | : RAT(SPR.DAWL.), 1 Day, I.V. | DATE            | : 05-DEC-14 |
| SPONSOR     | : Stanford University School  | PATHDATA SYSTEM | V6.2c2      |

NUMBER OF ANIMALS WITH MICROSCOPIC FINDINGS BY ORGAN/GROUP/SEX  
STATUS AT NECROPSY: R1

|                         |   |     |        |
|-------------------------|---|-----|--------|
| SEX                     | : |     | FEMALE |
| DOSE GROUP:             |   | 1 2 |        |
| NO.ANIMALS:             |   | 5 5 |        |
| <hr/>                   |   |     |        |
| LIVER                   | : | 5 5 |        |
| - Mononuc. cell infil.: |   | 1 - |        |
| Grade 1:                |   | 1 - |        |
| <hr/>                   |   |     |        |
| SPLEEN                  | : | 5 5 |        |
| - Lymphoid hyperplasia: |   | 1 - |        |
| Grade 1:                |   | 1 - |        |
| <hr/>                   |   |     |        |
| THYROID GLAND           | : | 5 5 |        |
| - Ectopic thymus        | : | 1 - |        |

PATHOLOGY REPORT  
INDIVIDUAL ANIMAL DATA

PROJECT :SB-SU-003

---

TEST ITEM : [18F]FP-R01-MG-F2                      PATHOL. NO.: 14041 DSG  
TEST SYSTEM : RAT(SPR.DAWL.), 1 Day, I.V.        DATE : 05-DEC-14  
SPONSOR : Stanford University School            PATHDATA SYSTEM V6.2c2

TABLE OF INDIVIDUAL MICROSCOPIC FINDINGS (AOFT)  
DOSE GROUP : 1, Group 1

ANIMAL NUMBER :

|                        | 801 | 802  | 803 | 804 | 805 | 806 | 807 | 808 | 809 | 810 |
|------------------------|-----|------|-----|-----|-----|-----|-----|-----|-----|-----|
|                        | MKO | MKO  | MKO | MKO | MKO | MRI | MRI | MRI | MRI | MRI |
| BRAIN                  | -   | -    | -   | -   | -   | -   | -   | -   | -   | -   |
| CECUM                  | -   | -    | -   | -   | -   | -   | -   | -   | -   | -   |
| COLON                  | -   | -    | -   | -   | -   | -   | -   | -   | -   | -   |
| EYES                   | -   | (-*) | -   | -   | -   | -   | -   | -   | -   | -   |
| HEART                  | -   | -    | -   | -   | -   | -   | +   | -   | -   | -   |
| - Mononuc. cell infil. | .   | .    | .   | .   | .   | .   | 1.  | .   | .   | .   |
| ILEUM                  | -   | -    | -   | -   | -   | -   | -   | -   | -   | -   |
| INJECTION SITE         | +   | -    | -   | -   | -   | A   | A   | A   | A   | A   |
| - Inflammation         | 2.  | .    | .   | .   | .   | .   | .   | .   | .   | .   |
| KIDNEYS                | -   | -    | -   | -   | -   | -   | -   | -   | -   | -   |
| LIVER                  | -   | -    | -   | -   | -   | -   | +   | -   | -   | -   |
| - Mononuc. cell infil. | .   | .    | .   | .   | .   | .   | 1.  | .   | .   | .   |
| LUNG                   | -   | -    | -   | -   | -   | -   | -   | -   | -   | -   |
| LYMPH NODE: MESENT.    | -   | -    | -   | -   | -   | -   | -   | -   | -   | -   |
| OPTIC NERVES           | -   | -    | -   | -   | -   | -   | -   | -   | -   | -   |
| PARATHYROID GLANDS     | -   | (-   | 0   | 0   | -   | 0   | (-  | 0   | -*  | -   |
| SALIVARY GLANDS        | -   | -    | -   | -   | -   | -   | -   | -   | -   | -   |
| SPLEEN                 | -   | -    | -   | -   | -   | -   | -   | -   | -   | -   |
| TESTES                 | -   | -    | -   | -   | -   | -   | -   | -   | -   | -   |
| THYROID GLAND          | -   | -    | 0   | -   | -   | -   | -   | -   | -   | -   |
| TRACHEA                | -   | -    | -   | -   | -   | -   | -   | -   | -   | -   |

PATHOLOGY REPORT  
INDIVIDUAL ANIMAL DATA PROJECT :SB-SU-003

---

TEST ITEM : [18F]FP-R01-MG-F2 PATHOL. NO.: 14041 DSG  
 TEST SYSTEM : RAT(SPR.DAWL.), 1 Day, I.V. DATE : 05-DEC-14  
 SPONSOR : Stanford University School PATHDATA SYSTEM V6.2c2

---

TABLE OF INDIVIDUAL MICROSCOPIC FINDINGS (AOFT)  
 DOSE GROUP : 1, Group 1

---

ANIMAL NUMBER :

|  | 801 | 802 | 803 | 804 | 805 | 806 | 807 | 808 | 809 | 810 |
|--|-----|-----|-----|-----|-----|-----|-----|-----|-----|-----|
|  | MKO | MKO | MKO | MKO | MKO | MRI | MRI | MRI | MRI | MRI |

---

URINARY BLADDER - - - - -  
 .....

PATHOLOGY REPORT  
INDIVIDUAL ANIMAL DATA PROJECT :SB-SU-003

---

TEST ITEM : [18F]FP-R01-MG-F2 PATHOL. NO.: 14041 DSG  
TEST SYSTEM : RAT(SPR.DAWL.), 1 Day, I.V. DATE : 05-DEC-14  
SPONSOR : Stanford University School PATHDATA SYSTEM V6.2c2

TABLE OF INDIVIDUAL MICROSCOPIC FINDINGS (AOFT)  
DOSE GROUP : 1, Group 1

ANIMAL NUMBER :

|                        | 823 | 824 | 825 | 826 | 827 | 828 | 829 | 830 | 831 | 832 |
|------------------------|-----|-----|-----|-----|-----|-----|-----|-----|-----|-----|
|                        | FKO | FKO | FKO | FKO | FKO | FRI | FRI | FRI | FRI | FRI |
| BRAIN                  | -   | -   | -   | -   | -   | -   | -   | -   | -   | -   |
| CECUM                  | -   | -   | -   | -   | -   | -   | -   | -   | -   | -   |
| COLON                  | -   | -   | -   | -   | -   | -   | -   | -   | -   | -   |
| EYES                   | -   | -   | -   | -   | -   | -   | -   | -   | -   | -   |
| HEART                  | -   | -   | -   | -   | -   | -   | -   | -   | -   | -   |
| ILEUM                  | -   | -   | -   | -   | -   | -   | -   | -   | -   | -   |
| INJECTION SITE         | -   | -   | -   | -   | -   | A   | A   | A   | A   | A   |
| KIDNEYS                | -   | -   | -   | -   | -   | -   | -   | -   | -   | -   |
| LIVER                  | +   | -   | -   | -   | -   | -   | -   | -   | +   | -   |
| - Mononuc. cell infil. | 1.  | .   | .   | .   | .   | .   | .   | .   | 1.  | .   |
| LUNG                   | -   | +   | -   | -   | -   | -   | -   | -   | -   | -   |
| - Foreign body embolus | .   | 1.  | .   | .   | .   | .   | .   | .   | .   | .   |
| LYMPH NODE: MESENT.    | -   | -   | -   | -   | -   | -   | -   | -   | -   | -   |
| OPTIC NERVES           | -   | -   | -   | -   | -   | -   | -   | -   | -   | -   |
| OVARIES                | -   | -   | -   | -   | -   | -   | -   | -   | -   | -   |
| PARATHYROID GLANDS     | -   | -   | (   | (   | (   | 0   | 0   | (   | -   | 0   |
| SALIVARY GLANDS        | -   | -   | -   | -   | -   | -   | -   | -   | -   | -   |
| SPLEEN                 | -   | -   | -   | -   | -   | -   | -   | -   | -   | +   |
| - Lymphoid hyperplasia | .   | .   | .   | .   | .   | .   | .   | .   | .   | 1.  |
| THYROID GLAND          | -   | -   | (   | +   | -   | -   | -   | +   | -   | -   |
| - Ectopic thymus       | .   | .   | .   | (   | P.  | .   | .   | (   | P.  | .   |
| TRACHEA                | -   | -   | -   | -   | -   | -   | -   | -   | -   | -   |



PATHOLOGY REPORT  
INDIVIDUAL ANIMAL DATA

---

|             |                               |                 |             |
|-------------|-------------------------------|-----------------|-------------|
| TEST ITEM   | : [18F]FP-R01-MG-F2           | PATHOL. NO.:    | 14041 DSG   |
| TEST SYSTEM | : RAT(SPR.DAWL.), 1 Day, I.V. | DATE            | : 05-DEC-14 |
| SPONSOR     | : Stanford University School  | PATHDATA SYSTEM | V6.2c2      |

---

TABLE OF INDIVIDUAL MICROSCOPIC FINDINGS (AOFT)  
DOSE GROUP : 1, Group 1

---

ANIMAL NUMBER :

|  |     |     |     |     |     |     |     |     |     |     |
|--|-----|-----|-----|-----|-----|-----|-----|-----|-----|-----|
|  | 823 | 824 | 825 | 826 | 827 | 828 | 829 | 830 | 831 | 832 |
|  | FKO | FKO | FKO | FKO | FKO | FRI | FRI | FRI | FRI | FRI |

---

URINARY BLADDER                    -   -   -   -   -   -   -   -   -   -   -  
.....

PATHOLOGY REPORT  
INDIVIDUAL ANIMAL DATA PROJECT :SB-SU-003

---

TEST ITEM : [18F]FP-R01-MG-F2 PATHOL. NO.: 14041 DSG  
TEST SYSTEM : RAT(SPR.DAWL.), 1 Day, I.V. DATE : 05-DEC-14  
SPONSOR : Stanford University School PATHDATA SYSTEM V6.2c2

TABLE OF INDIVIDUAL MICROSCOPIC FINDINGS (AOFT)  
DOSE GROUP : 2, Group 2

ANIMAL NUMBER :

|                       | 811 | 812 | 813 | 814 | 815 | 816  | 817 | 818 | 819  | 820  |
|-----------------------|-----|-----|-----|-----|-----|------|-----|-----|------|------|
|                       | MKO | MKO | MKO | MKO | MKO | MRI  | MRI | MRI | MRI  | MRI  |
| BRAIN                 | -   | -   | -   | -   | -   | -    | -   | -   | -    | -    |
| CECUM                 | -   | -   | -   | -   | -   | -    | -   | -   | -    | -    |
| COLON                 | -   | -   | -   | -   | -   | -    | -   | -   | -    | -    |
| EYES                  | -   | -   | -   | -   | -   | -    | -   | -   | +    | -    |
| - Degeneration:cornea | .   | .   | .   | .   | .   | .    | .   | .   | ( 2. | .    |
| HEART                 | -   | -   | -   | -   | -   | -    | -   | -   | -    | -    |
| ILEUM                 | -   | -   | -   | -   | -   | -    | -   | -   | -    | -    |
| INJECTION SITE        | -   | -   | -   | -   | -   | A    | A   | A   | A    | A    |
| KIDNEYS               | -   | -   | -   | -   | -   | -    | -   | -   | -    | -    |
| LIVER                 | -   | -   | -   | -   | -   | -    | -   | -   | -    | -    |
| LUNG                  | -   | -   | -   | -   | -   | -    | -   | -   | -    | -    |
| LYMPH NODE: MESENT.   | -   | -   | -   | -   | -   | -    | -   | -   | -    | -    |
| OPTIC NERVES          | -   | -   | -   | -   | -   | -    | -   | -   | -    | -    |
| PARATHYROID GLANDS    | -   | -   | 0   | ( - | -   | 0    | -   | 0   | ( -* | ( -  |
| SALIVARY GLANDS       | -   | -   | -   | -   | -   | -    | -   | -   | -    | -    |
| SPLEEN                | -   | -   | -   | -   | -   | -    | -   | -   | -    | -    |
| TESTES                | -   | -   | -   | -   | -   | -    | -   | -   | -    | -    |
| THYROID GLAND         | -   | -   | -   | -   | -   | +    | -   | ( - | ( -  | +    |
| - Ectopic thymus      | .   | .   | .   | .   | .   | ( P. | .   | .   | .    | ( P. |
| TRACHEA               | -   | -   | -   | -   | -   | -    | -   | -   | -    | -    |
| URINARY BLADDER       | -   | -   | -   | -   | -   | -    | -   | -   | -    | -    |

PATHOLOGY REPORT  
INDIVIDUAL ANIMAL DATA PROJECT :SB-SU-003

---

TEST ITEM : [18F]FP-R01-MG-F2 PATHOL. NO.: 14041 DSG  
TEST SYSTEM : RAT(SPR.DAWL.), 1 Day, I.V. DATE : 05-DEC-14  
SPONSOR : Stanford University School PATHDATA SYSTEM V6.2c2

TABLE OF INDIVIDUAL MICROSCOPIC FINDINGS (AOFT)  
DOSE GROUP : 2, Group 2

ANIMAL NUMBER :

|                     | 833 | 834 | 835 | 836 | 837 | 838 | 839 | 840 | 841 | 842 |
|---------------------|-----|-----|-----|-----|-----|-----|-----|-----|-----|-----|
|                     | FKO | FKO | FKO | FKO | FKO | FRI | FRI | FRI | FRI | FRI |
| BRAIN               | -   | -   | -   | -   | -   | -   | -   | -   | -   | -   |
| CECUM               | -   | -   | -   | -   | -   | -   | -   | -   | -   | -   |
| COLON               | -   | -   | -   | -   | -   | -   | -   | -   | -   | -   |
| EYES                | -   | -   | -   | -   | -   | -   | -   | -   | -   | -   |
| HEART               | -   | -   | -   | -   | -   | -   | -   | -   | -   | -   |
| ILEUM               | -   | -   | -   | -   | -   | -   | -   | -   | -   | -   |
| INJECTION SITE      | -   | -   | -   | +   | -   | A   | A   | A   | A   | A   |
| - Inflammation      | .   | .   | .   | 2.  | .   | .   | .   | .   | .   | .   |
| KIDNEYS             | -   | -   | -   | -   | -   | -   | -   | -   | -   | -   |
| LIVER               | -   | -   | -   | -   | -   | -   | -   | -   | -   | -   |
| LUNG                | -   | -   | -   | -   | -   | -   | -   | -   | -   | -   |
| LYMPH NODE: MESENT. | -   | -   | -   | -   | -   | -   | -   | -   | -   | -   |
| OPTIC NERVES        | -   | -   | -   | -   | -   | -   | -   | -   | -   | -   |
| OVARIES             | -   | -   | -   | -   | -   | -   | -   | -   | -   | -   |
| PARATHYROID GLANDS  | ( - | -   | 0   | -   | ( - | ( - | 0   | ( - | 0   | 0   |
| SALIVARY GLANDS     | -   | -   | -   | -   | -   | -   | -   | -   | -   | -   |
| SPLEEN              | -   | -   | -   | -   | -   | -   | -   | -   | -   | -   |
| THYROID GLAND       | -   | -   | -   | -   | -   | -   | -   | -   | -   | ( - |
| TRACHEA             | -   | -   | -   | -   | -   | -   | -   | -   | -   | -   |
| URINARY BLADDER     | -   | -   | -   | -   | -   | -   | -   | -   | -   | -   |

PATHOLOGY REPORT  
INDIVIDUAL ANIMAL DATA

PROJECT :SB-SU-003

TEST ITEM : [18F]FP-R01-MG-F2  
TEST SYSTEM : RAT(SPR.DAWL.), 1 Day, I.V.  
SPONSOR : Stanford University School

PATHOL. NO.: 14041 DSG  
DATE : 05-DEC-14  
PATHDATA SYSTEM V6.2c2

ANIMAL HEADING DATA

DOSE GROUP : 1, Group 1

| ANIMAL NUMBER | SEX M/F | DEFINED STATE | AND FINAL STATE OF NECROPSY | TEST DAYS | FIRST AND LAST DAY UNDER TEST | DATE OF NECROPSY |
|---------------|---------|---------------|-----------------------------|-----------|-------------------------------|------------------|
| 801           | M       | K0            | K0                          | 3         | 07-OCT-14                     | 09-OCT-14        |
| 802           | M       | K0            | K0                          | 3         | 07-OCT-14                     | 09-OCT-14        |
| 803           | M       | K0            | K0                          | 3         | 07-OCT-14                     | 09-OCT-14        |
| 804           | M       | K0            | K0                          | 3         | 07-OCT-14                     | 09-OCT-14        |
| 805           | M       | K0            | K0                          | 3         | 07-OCT-14                     | 09-OCT-14        |
| 806           | M       | R1            | R1                          | 15        | 07-OCT-14                     | 21-OCT-14        |
| 807           | M       | R1            | R1                          | 15        | 07-OCT-14                     | 21-OCT-14        |
| 808           | M       | R1            | R1                          | 15        | 07-OCT-14                     | 21-OCT-14        |
| 809           | M       | R1            | R1                          | 15        | 07-OCT-14                     | 21-OCT-14        |
| 810           | M       | R1            | R1                          | 15        | 07-OCT-14                     | 21-OCT-14        |
| 823           | F       | K0            | K0                          | 3         | 07-OCT-14                     | 09-OCT-14        |
| 824           | F       | K0            | K0                          | 3         | 07-OCT-14                     | 09-OCT-14        |
| 825           | F       | K0            | K0                          | 3         | 07-OCT-14                     | 09-OCT-14        |
| 826           | F       | K0            | K0                          | 3         | 07-OCT-14                     | 09-OCT-14        |
| 827           | F       | K0            | K0                          | 3         | 07-OCT-14                     | 09-OCT-14        |
| 828           | F       | R1            | R1                          | 15        | 07-OCT-14                     | 21-OCT-14        |
| 829           | F       | R1            | R1                          | 15        | 07-OCT-14                     | 21-OCT-14        |
| 830           | F       | R1            | R1                          | 15        | 07-OCT-14                     | 21-OCT-14        |
| 831           | F       | R1            | R1                          | 15        | 07-OCT-14                     | 21-OCT-14        |
| 832           | F       | R1            | R1                          | 15        | 07-OCT-14                     | 21-OCT-14        |

PATHOLOGY REPORT  
INDIVIDUAL ANIMAL DATA

---

PROJECT :SB-SU-003

---

TEST ITEM : [18F]FP-R01-MG-F2                      PATHOL. NO.: 14041 DSG  
TEST SYSTEM : RAT(SPR.DAWL.), 1 Day, I.V.        DATE : 05-DEC-14  
SPONSOR : Stanford University School            PATHDATA SYSTEM V6.2c2

---

TEXT OF GROSS AND MICROSCOPIC FINDINGS  
DOSE GROUP : 1, Group 1

---

\* ANIMAL NUMBER : 801                           SEX : MALE  
FIRST DAY ON TEST : 07-Oct-14  
LAST DAY ON TEST : 09-Oct-14  
DAYS ON TEST : 3  
DATE OF NECROPSY : 09-Oct-14  
DEFINED SACR.GROUP : TERMINAL SACRIFICE GROUP  
STATUS AT NECROPSY : TERMINAL SACRIFICE GROUP

.....

\* NECROPSY FINDINGS

NO NECROPSY OBSERVATIONS NOTED.

\* MICROSCOPIC FINDINGS

INJECTION SITE (TAIL):  
-Inflammation:perivascular, grade 2  
ALL OTHER PROTOCOL TISSUES WITHOUT PATHOLOGIC FINDINGS.

---

PATHOLOGY REPORT  
INDIVIDUAL ANIMAL DATA

---

PROJECT :SB-SU-003

---

TEST ITEM : [18F]FP-R01-MG-F2  
TEST SYSTEM : RAT(SPR.DAWL.), 1 Day, I.V.  
SPONSOR : Stanford University School

PATHOL. NO.: 14041 DSG  
DATE : 05-DEC-14  
PATHDATA SYSTEM V6.2c2

---

TEXT OF GROSS AND MICROSCOPIC FINDINGS  
DOSE GROUP : 1, Group 1

---

\* ANIMAL NUMBER : 802 SEX : MALE  
FIRST DAY ON TEST : 07-Oct-14  
LAST DAY ON TEST : 09-Oct-14  
DAYS ON TEST : 3  
DATE OF NECROPSY : 09-Oct-14  
DEFINED SACR.GROUP : TERMINAL SACRIFICE GROUP  
STATUS AT NECROPSY : TERMINAL SACRIFICE GROUP

.....

\* NECROPSY FINDINGS

NO NECROPSY OBSERVATIONS NOTED.

\* MICROSCOPIC FINDINGS

EYES:  
Only one of paired organs examined/present  
One eye with artifact precludes evaluation.  
PARATHYROID GLANDS:  
Only one of paired organs examined/present  
NO MICROSCOPIC FINDINGS NOTED.

---

PATHOLOGY REPORT  
INDIVIDUAL ANIMAL DATA PROJECT :SB-SU-003

---

TEST ITEM : [18F]FP-R01-MG-F2 PATHOL. NO.: 14041 DSG  
TEST SYSTEM : RAT(SPR.DAWL.), 1 Day, I.V. DATE : 05-DEC-14  
SPONSOR : Stanford University School PATHDATA SYSTEM V6.2c2

---

TEXT OF GROSS AND MICROSCOPIC FINDINGS  
DOSE GROUP : 1, Group 1

---

\* ANIMAL NUMBER : 803 SEX : MALE  
FIRST DAY ON TEST : 07-Oct-14  
LAST DAY ON TEST : 09-Oct-14  
DAYS ON TEST : 3  
DATE OF NECROPSY : 09-Oct-14  
DEFINED SACR.GROUP : TERMINAL SACRIFICE GROUP  
STATUS AT NECROPSY : TERMINAL SACRIFICE GROUP

---

\* NECROPSY FINDINGS

NO NECROPSY OBSERVATIONS NOTED.

\* MICROSCOPIC FINDINGS

PARATHYROID GLANDS:  
Tissue not present for histologic examination  
THYROID GLAND:  
Tissue not present for histologic examination  
ALL OTHER PROTOCOL TISSUES WITHOUT PATHOLOGIC FINDINGS.

---

PATHOLOGY REPORT  
INDIVIDUAL ANIMAL DATA

PROJECT :SB-SU-003

---

TEST ITEM : [18F]FP-R01-MG-F2  
TEST SYSTEM : RAT(SPR.DAWL.), 1 Day, I.V.  
SPONSOR : Stanford University School

PATHOL. NO.: 14041 DSG  
DATE : 05-DEC-14  
PATHDATA SYSTEM V6.2c2

---

TEXT OF GROSS AND MICROSCOPIC FINDINGS  
DOSE GROUP : 1, Group 1

---

\* ANIMAL NUMBER : 804 SEX : MALE  
FIRST DAY ON TEST : 07-Oct-14  
LAST DAY ON TEST : 09-Oct-14  
DAYS ON TEST : 3  
DATE OF NECROPSY : 09-Oct-14  
DEFINED SACR.GROUP : TERMINAL SACRIFICE GROUP  
STATUS AT NECROPSY : TERMINAL SACRIFICE GROUP

.....

\* NECROPSY FINDINGS  
NO NECROPSY OBSERVATIONS NOTED.

\* MICROSCOPIC FINDINGS  
PARATHYROID GLANDS:  
Tissue not present for histologic examination  
ALL OTHER PROTOCOL TISSUES WITHOUT PATHOLOGIC FINDINGS.

---



PATHOLOGY REPORT  
INDIVIDUAL ANIMAL DATA PROJECT :SB-SU-003

---

TEST ITEM : [18F]FP-R01-MG-F2 PATHOL. NO.: 14041 DSG  
TEST SYSTEM : RAT(SPR.DAWL.), 1 Day, I.V. DATE : 05-DEC-14  
SPONSOR : Stanford University School PATHDATA SYSTEM V6.2c2

---

TEXT OF GROSS AND MICROSCOPIC FINDINGS  
DOSE GROUP : 1, Group 1

---

\* ANIMAL NUMBER : 805 SEX : MALE  
FIRST DAY ON TEST : 07-Oct-14  
LAST DAY ON TEST : 09-Oct-14  
DAYS ON TEST : 3  
DATE OF NECROPSY : 09-Oct-14  
DEFINED SACR.GROUP : TERMINAL SACRIFICE GROUP  
STATUS AT NECROPSY : TERMINAL SACRIFICE GROUP

.....

\* NECROPSY FINDINGS

NO NECROPSY OBSERVATIONS NOTED.

\* MICROSCOPIC FINDINGS

NO MICROSCOPIC FINDINGS NOTED.

---

PATHOLOGY REPORT  
INDIVIDUAL ANIMAL DATA

---

|             |                               |                 |             |
|-------------|-------------------------------|-----------------|-------------|
| TEST ITEM   | : [18F]FP-R01-MG-F2           | PROJECT         | : SB-SU-003 |
| TEST SYSTEM | : RAT(SPR.DAWL.), 1 Day, I.V. | PATHOL. NO.:    | 14041 DSG   |
| SPONSOR     | : Stanford University School  | DATE            | : 05-DEC-14 |
|             |                               | PATHDATA SYSTEM | V6.2c2      |

---

TEXT OF GROSS AND MICROSCOPIC FINDINGS  
DOSE GROUP : 1, Group 1

---

\* ANIMAL NUMBER : 806 SEX : MALE  
FIRST DAY ON TEST : 07-Oct-14  
LAST DAY ON TEST : 21-Oct-14  
DAYS ON TEST : 15  
DATE OF NECROPSY : 21-Oct-14  
DEFINED SACR.GROUP : RECOVERY / POST-TREATMENT GROUP  
STATUS AT NECROPSY : RECOVERY / POST-TREATMENT GROUP

.....

\* NECROPSY FINDINGS

NO NECROPSY OBSERVATIONS NOTED.

\* MICROSCOPIC FINDINGS

INJECTION SITE (TAIL):  
Severe autolysis, evaluation not possible  
PARATHYROID GLANDS:  
Tissue not present for histologic examination  
ALL OTHER PROTOCOL TISSUES WITHOUT PATHOLOGIC FINDINGS.

---

```

PATHOLOGY REPORT
INDIVIDUAL ANIMAL DATA                                PROJECT   :SB-SU-003
-----
TEST ITEM       : [18F]FP-R01-MG-F2                   PATHOL. NO.: 14041 DSG
TEST SYSTEM    : RAT(SPR.DAWL.), 1 Day, I.V.         DATE       : 05-DEC-14
SPONSOR        : Stanford University School          PATHDATA SYSTEM V6.2c2
-----
TEXT OF GROSS AND MICROSCOPIC FINDINGS
DOSE GROUP     : 1, Group 1
-----
* ANIMAL NUMBER           :      807                SEX   : MALE
  FIRST DAY ON TEST       : 07-Oct-14
  LAST DAY ON TEST       : 21-Oct-14
  DAYS ON TEST           :      15
  DATE OF NECROPSY       : 21-Oct-14
  DEFINED SACR.GROUP     : RECOVERY / POST-TREATMENT GROUP
  STATUS AT NECROPSY     : RECOVERY / POST-TREATMENT GROUP
.....
* NECROPSY FINDINGS

NO NECROPSY OBSERVATIONS NOTED.

* MICROSCOPIC FINDINGS

HEART:
-Mononuclear cell infiltrates, myocardium, focal, grade 1
INJECTION SITE (TAIL):
  Severe autolysis, evaluation not possible
LIVER:
-Mononuclear cell infiltrates, focal, grade 1
PARATHYROID GLANDS:
  Only one of paired organs examined/present
ALL OTHER PROTOCOL TISSUES WITHOUT PATHOLOGIC FINDINGS.

```

PATHOLOGY REPORT  
INDIVIDUAL ANIMAL DATA

---

PROJECT :SB-SU-003

---

TEST ITEM : [18F]FP-R01-MG-F2  
TEST SYSTEM : RAT(SPR.DAWL.), 1 Day, I.V.  
SPONSOR : Stanford University School

PATHOL. NO.: 14041 DSG  
DATE : 05-DEC-14  
PATHDATA SYSTEM V6.2c2

---

TEXT OF GROSS AND MICROSCOPIC FINDINGS  
DOSE GROUP : 1, Group 1

---

\* ANIMAL NUMBER : 808 SEX : MALE  
FIRST DAY ON TEST : 07-Oct-14  
LAST DAY ON TEST : 21-Oct-14  
DAYS ON TEST : 15  
DATE OF NECROPSY : 21-Oct-14  
DEFINED SACR.GROUP : RECOVERY / POST-TREATMENT GROUP  
STATUS AT NECROPSY : RECOVERY / POST-TREATMENT GROUP

---

\* NECROPSY FINDINGS

NO NECROPSY OBSERVATIONS NOTED.

\* MICROSCOPIC FINDINGS

INJECTION SITE (TAIL):  
Severe autolysis, evaluation not possible  
PARATHYROID GLANDS:  
Tissue not present for histologic examination  
ALL OTHER PROTOCOL TISSUES WITHOUT PATHOLOGIC FINDINGS.

---

PATHOLOGY REPORT  
INDIVIDUAL ANIMAL DATA

---

|             |                               |                 |             |
|-------------|-------------------------------|-----------------|-------------|
| TEST ITEM   | : [18F]FP-R01-MG-F2           | PROJECT         | : SB-SU-003 |
| TEST SYSTEM | : RAT(SPR.DAWL.), 1 Day, I.V. | PATHOL. NO.:    | 14041 DSG   |
| SPONSOR     | : Stanford University School  | DATE            | : 05-DEC-14 |
|             |                               | PATHDATA SYSTEM | V6.2c2      |

---

TEXT OF GROSS AND MICROSCOPIC FINDINGS  
DOSE GROUP : 1, Group 1

---

|                    |                                   |     |        |
|--------------------|-----------------------------------|-----|--------|
| * ANIMAL NUMBER    | : 809                             | SEX | : MALE |
| FIRST DAY ON TEST  | : 07-Oct-14                       |     |        |
| LAST DAY ON TEST   | : 21-Oct-14                       |     |        |
| DAYS ON TEST       | : 15                              |     |        |
| DATE OF NECROPSY   | : 21-Oct-14                       |     |        |
| DEFINED SACR.GROUP | : RECOVERY / POST-TREATMENT GROUP |     |        |
| STATUS AT NECROPSY | : RECOVERY / POST-TREATMENT GROUP |     |        |

---

\* NECROPSY FINDINGS

NO NECROPSY OBSERVATIONS NOTED.

\* MICROSCOPIC FINDINGS

INJECTION SITE (TAIL):  
Severe autolysis, evaluation not possible  
PARATHYROID GLANDS:  
Bilateral parathyroid glands present for evaluation.  
ALL OTHER PROTOCOL TISSUES WITHOUT PATHOLOGIC FINDINGS.

---

PATHOLOGY REPORT  
INDIVIDUAL ANIMAL DATA

---

|             |                               |                 |             |
|-------------|-------------------------------|-----------------|-------------|
| TEST ITEM   | : [18F]FP-R01-MG-F2           | PROJECT         | : SB-SU-003 |
| TEST SYSTEM | : RAT(SPR.DAWL.), 1 Day, I.V. | PATHOL. NO.:    | 14041 DSG   |
| SPONSOR     | : Stanford University School  | DATE            | : 05-DEC-14 |
|             |                               | PATHDATA SYSTEM | V6.2c2      |

---

TEXT OF GROSS AND MICROSCOPIC FINDINGS  
DOSE GROUP : 1, Group 1

---

\* ANIMAL NUMBER : 810 SEX : MALE  
FIRST DAY ON TEST : 07-Oct-14  
LAST DAY ON TEST : 21-Oct-14  
DAYS ON TEST : 15  
DATE OF NECROPSY : 21-Oct-14  
DEFINED SACR.GROUP : RECOVERY / POST-TREATMENT GROUP  
STATUS AT NECROPSY : RECOVERY / POST-TREATMENT GROUP

---

\* NECROPSY FINDINGS

NO NECROPSY OBSERVATIONS NOTED.

\* MICROSCOPIC FINDINGS

INJECTION SITE (TAIL):  
Severe autolysis, evaluation not possible  
ALL OTHER PROTOCOL TISSUES WITHOUT PATHOLOGIC FINDINGS.

---

PATHOLOGY REPORT  
INDIVIDUAL ANIMAL DATA

---

|             |                               |                 |             |
|-------------|-------------------------------|-----------------|-------------|
| TEST ITEM   | : [18F]FP-R01-MG-F2           | PROJECT         | : SB-SU-003 |
| TEST SYSTEM | : RAT(SPR.DAWL.), 1 Day, I.V. | PATHOL. NO.:    | 14041 DSG   |
| SPONSOR     | : Stanford University School  | DATE            | : 05-DEC-14 |
|             |                               | PATHDATA SYSTEM | V6.2c2      |

---

TEXT OF GROSS AND MICROSCOPIC FINDINGS  
DOSE GROUP : 1, Group 1

---

|                    |                            |     |          |
|--------------------|----------------------------|-----|----------|
| * ANIMAL NUMBER    | : 823                      | SEX | : FEMALE |
| FIRST DAY ON TEST  | : 07-Oct-14                |     |          |
| LAST DAY ON TEST   | : 09-Oct-14                |     |          |
| DAYS ON TEST       | : 3                        |     |          |
| DATE OF NECROPSY   | : 09-Oct-14                |     |          |
| DEFINED SACR.GROUP | : TERMINAL SACRIFICE GROUP |     |          |
| STATUS AT NECROPSY | : TERMINAL SACRIFICE GROUP |     |          |

---

\* NECROPSY FINDINGS

NO NECROPSY OBSERVATIONS NOTED.

\* MICROSCOPIC FINDINGS

LIVER:  
-Mononuclear cell infiltrates, focal, grade 1  
ALL OTHER PROTOCOL TISSUES WITHOUT PATHOLOGIC FINDINGS.

---

PATHOLOGY REPORT  
INDIVIDUAL ANIMAL DATA

---

PROJECT :SB-SU-003

---

TEST ITEM : [18F]FP-R01-MG-F2  
TEST SYSTEM : RAT(SPR.DAWL.), 1 Day, I.V.  
SPONSOR : Stanford University School

PATHOL. NO.: 14041 DSG  
DATE : 05-DEC-14  
PATHDATA SYSTEM V6.2c2

---

TEXT OF GROSS AND MICROSCOPIC FINDINGS  
DOSE GROUP : 1, Group 1

---

\* ANIMAL NUMBER : 824 SEX : FEMALE  
FIRST DAY ON TEST : 07-Oct-14  
LAST DAY ON TEST : 09-Oct-14  
DAYS ON TEST : 3  
DATE OF NECROPSY : 09-Oct-14  
DEFINED SACR.GROUP : TERMINAL SACRIFICE GROUP  
STATUS AT NECROPSY : TERMINAL SACRIFICE GROUP

---

\* NECROPSY FINDINGS

NO NECROPSY OBSERVATIONS NOTED.

\* MICROSCOPIC FINDINGS

LUNG:  
-Foreign body embolus, single, grade 1  
ALL OTHER PROTOCOL TISSUES WITHOUT PATHOLOGIC FINDINGS.

---



PATHOLOGY REPORT  
INDIVIDUAL ANIMAL DATA

---

PROJECT :SB-SU-003

---

TEST ITEM : [18F]FP-R01-MG-F2  
TEST SYSTEM : RAT(SPR.DAWL.), 1 Day, I.V.  
SPONSOR : Stanford University School

PATHOL. NO.: 14041 DSG  
DATE : 05-DEC-14  
PATHDATA SYSTEM V6.2c2

---

TEXT OF GROSS AND MICROSCOPIC FINDINGS  
DOSE GROUP : 1, Group 1

---

\* ANIMAL NUMBER : 825 SEX : FEMALE  
FIRST DAY ON TEST : 07-Oct-14  
LAST DAY ON TEST : 09-Oct-14  
DAYS ON TEST : 3  
DATE OF NECROPSY : 09-Oct-14  
DEFINED SACR.GROUP : TERMINAL SACRIFICE GROUP  
STATUS AT NECROPSY : TERMINAL SACRIFICE GROUP

---

\* NECROPSY FINDINGS

NO NECROPSY OBSERVATIONS NOTED.

\* MICROSCOPIC FINDINGS

PARATHYROID GLANDS:  
Only one of paired organs examined/present  
THYROID GLAND:  
Only one of paired organs examined/present  
NO MICROSCOPIC FINDINGS NOTED.

---

PATHOLOGY REPORT  
INDIVIDUAL ANIMAL DATA

---

|             |                               |                 |             |
|-------------|-------------------------------|-----------------|-------------|
| TEST ITEM   | : [18F]FP-R01-MG-F2           | PROJECT         | : SB-SU-003 |
| TEST SYSTEM | : RAT(SPR.DAWL.), 1 Day, I.V. | PATHOL. NO.:    | 14041 DSG   |
| SPONSOR     | : Stanford University School  | DATE            | : 05-DEC-14 |
|             |                               | PATHDATA SYSTEM | V6.2c2      |

---

TEXT OF GROSS AND MICROSCOPIC FINDINGS  
DOSE GROUP : 1, Group 1

---

|                    |                            |     |          |
|--------------------|----------------------------|-----|----------|
| * ANIMAL NUMBER    | : 826                      | SEX | : FEMALE |
| FIRST DAY ON TEST  | : 07-Oct-14                |     |          |
| LAST DAY ON TEST   | : 09-Oct-14                |     |          |
| DAYS ON TEST       | : 3                        |     |          |
| DATE OF NECROPSY   | : 09-Oct-14                |     |          |
| DEFINED SACR.GROUP | : TERMINAL SACRIFICE GROUP |     |          |
| STATUS AT NECROPSY | : TERMINAL SACRIFICE GROUP |     |          |

---

\* NECROPSY FINDINGS

NO NECROPSY OBSERVATIONS NOTED.

\* MICROSCOPIC FINDINGS

PARATHYROID GLANDS:  
Only one of paired organs examined/present  
THYROID GLAND:  
-Ectopic thymus, unilateral  
ALL OTHER PROTOCOL TISSUES WITHOUT PATHOLOGIC FINDINGS.

---

PATHOLOGY REPORT  
INDIVIDUAL ANIMAL DATA

---

PROJECT :SB-SU-003

---

TEST ITEM : [18F]FP-R01-MG-F2  
TEST SYSTEM : RAT(SPR.DAWL.), 1 Day, I.V.  
SPONSOR : Stanford University School

PATHOL. NO.: 14041 DSG  
DATE : 05-DEC-14  
PATHDATA SYSTEM V6.2c2

---

TEXT OF GROSS AND MICROSCOPIC FINDINGS  
DOSE GROUP : 1, Group 1

---

\* ANIMAL NUMBER : 827 SEX : FEMALE  
FIRST DAY ON TEST : 07-Oct-14  
LAST DAY ON TEST : 09-Oct-14  
DAYS ON TEST : 3  
DATE OF NECROPSY : 09-Oct-14  
DEFINED SACR.GROUP : TERMINAL SACRIFICE GROUP  
STATUS AT NECROPSY : TERMINAL SACRIFICE GROUP

---

\* NECROPSY FINDINGS

NO NECROPSY OBSERVATIONS NOTED.

\* MICROSCOPIC FINDINGS

PARATHYROID GLANDS:  
Only one of paired organs examined/present  
NO MICROSCOPIC FINDINGS NOTED.

---

PATHOLOGY REPORT  
INDIVIDUAL ANIMAL DATA

---

PROJECT :SB-SU-003

---

TEST ITEM : [18F]FP-R01-MG-F2  
TEST SYSTEM : RAT(SPR.DAWL.), 1 Day, I.V.  
SPONSOR : Stanford University School

---

PATHOL. NO.: 14041 DSG  
DATE : 05-DEC-14  
PATHDATA SYSTEM V6.2c2

---

TEXT OF GROSS AND MICROSCOPIC FINDINGS  
DOSE GROUP : 1, Group 1

---

\* ANIMAL NUMBER : 828 SEX : FEMALE  
FIRST DAY ON TEST : 07-Oct-14  
LAST DAY ON TEST : 21-Oct-14  
DAYS ON TEST : 15  
DATE OF NECROPSY : 21-Oct-14  
DEFINED SACR.GROUP : RECOVERY / POST-TREATMENT GROUP  
STATUS AT NECROPSY : RECOVERY / POST-TREATMENT GROUP

---

\* NECROPSY FINDINGS

NO NECROPSY OBSERVATIONS NOTED.

\* MICROSCOPIC FINDINGS

INJECTION SITE (TAIL):  
Severe autolysis, evaluation not possible  
PARATHYROID GLANDS:  
Tissue not present for histologic examination  
ALL OTHER PROTOCOL TISSUES WITHOUT PATHOLOGIC FINDINGS.

---

PATHOLOGY REPORT  
INDIVIDUAL ANIMAL DATA

---

PROJECT :SB-SU-003

---

TEST ITEM : [18F]FP-R01-MG-F2  
TEST SYSTEM : RAT(SPR.DAWL.), 1 Day, I.V.  
SPONSOR : Stanford University School

PATHOL. NO.: 14041 DSG  
DATE : 05-DEC-14  
PATHDATA SYSTEM V6.2c2

---

TEXT OF GROSS AND MICROSCOPIC FINDINGS  
DOSE GROUP : 1, Group 1

---

\* ANIMAL NUMBER : 829 SEX : FEMALE  
FIRST DAY ON TEST : 07-Oct-14  
LAST DAY ON TEST : 21-Oct-14  
DAYS ON TEST : 15  
DATE OF NECROPSY : 21-Oct-14  
DEFINED SACR.GROUP : RECOVERY / POST-TREATMENT GROUP  
STATUS AT NECROPSY : RECOVERY / POST-TREATMENT GROUP

---

\* NECROPSY FINDINGS

NO NECROPSY OBSERVATIONS NOTED.

\* MICROSCOPIC FINDINGS

INJECTION SITE (TAIL):  
Severe autolysis, evaluation not possible  
PARATHYROID GLANDS:  
Tissue not present for histologic examination  
ALL OTHER PROTOCOL TISSUES WITHOUT PATHOLOGIC FINDINGS.

---

PATHOLOGY REPORT  
INDIVIDUAL ANIMAL DATA

---

|             |                               |                 |             |
|-------------|-------------------------------|-----------------|-------------|
| TEST ITEM   | : [18F]FP-R01-MG-F2           | PATHOL. NO.:    | 14041 DSG   |
| TEST SYSTEM | : RAT(SPR.DAWL.), 1 Day, I.V. | DATE            | : 05-DEC-14 |
| SPONSOR     | : Stanford University School  | PATHDATA SYSTEM | V6.2c2      |

---

TEXT OF GROSS AND MICROSCOPIC FINDINGS  
DOSE GROUP : 1, Group 1

---

|                    |                                   |     |          |
|--------------------|-----------------------------------|-----|----------|
| * ANIMAL NUMBER    | : 830                             | SEX | : FEMALE |
| FIRST DAY ON TEST  | : 07-Oct-14                       |     |          |
| LAST DAY ON TEST   | : 21-Oct-14                       |     |          |
| DAYS ON TEST       | : 15                              |     |          |
| DATE OF NECROPSY   | : 21-Oct-14                       |     |          |
| DEFINED SACR.GROUP | : RECOVERY / POST-TREATMENT GROUP |     |          |
| STATUS AT NECROPSY | : RECOVERY / POST-TREATMENT GROUP |     |          |

---

\* NECROPSY FINDINGS

NO NECROPSY OBSERVATIONS NOTED.

\* MICROSCOPIC FINDINGS

INJECTION SITE (TAIL):  
Severe autolysis, evaluation not possible  
PARATHYROID GLANDS:  
Only one of paired organs examined/present  
THYROID GLAND:  
-Ectopic thymus, unilateral  
ALL OTHER PROTOCOL TISSUES WITHOUT PATHOLOGIC FINDINGS.

---

PATHOLOGY REPORT  
INDIVIDUAL ANIMAL DATA

---

|             |                               |                 |             |
|-------------|-------------------------------|-----------------|-------------|
| TEST ITEM   | : [18F]FP-R01-MG-F2           | PATHOL. NO.:    | 14041 DSG   |
| TEST SYSTEM | : RAT(SPR.DAWL.), 1 Day, I.V. | DATE            | : 05-DEC-14 |
| SPONSOR     | : Stanford University School  | PATHDATA SYSTEM | V6.2c2      |

---

TEXT OF GROSS AND MICROSCOPIC FINDINGS  
DOSE GROUP : 1, Group 1

---

\* ANIMAL NUMBER : 831 SEX : FEMALE  
FIRST DAY ON TEST : 07-Oct-14  
LAST DAY ON TEST : 21-Oct-14  
DAYS ON TEST : 15  
DATE OF NECROPSY : 21-Oct-14  
DEFINED SACR.GROUP : RECOVERY / POST-TREATMENT GROUP  
STATUS AT NECROPSY : RECOVERY / POST-TREATMENT GROUP

---

\* NECROPSY FINDINGS

NO NECROPSY OBSERVATIONS NOTED.

\* MICROSCOPIC FINDINGS

INJECTION SITE (TAIL):  
Severe autolysis, evaluation not possible  
LIVER:  
-Mononuclear cell infiltrates, multifocal, grade 1  
ALL OTHER PROTOCOL TISSUES WITHOUT PATHOLOGIC FINDINGS.

---

```

PATHOLOGY REPORT
INDIVIDUAL ANIMAL DATA                                PROJECT      :SB-SU-003
-----
TEST ITEM       : [18F]FP-R01-MG-F2                   PATHOL. NO.: 14041 DSG
TEST SYSTEM    : RAT(SPR.DAWL.), 1 Day, I.V.          DATE         : 05-DEC-14
SPONSOR        : Stanford University School           PATHDATA SYSTEM V6.2c2
-----
TEXT OF GROSS AND MICROSCOPIC FINDINGS
DOSE GROUP     : 1, Group 1
-----
* ANIMAL NUMBER           :      832                SEX : FEMALE
  FIRST DAY ON TEST       : 07-Oct-14
  LAST DAY ON TEST       : 21-Oct-14
  DAYS ON TEST           :      15
  DATE OF NECROPSY       : 21-Oct-14
  DEFINED SACR.GROUP     : RECOVERY / POST-TREATMENT GROUP
  STATUS AT NECROPSY     : RECOVERY / POST-TREATMENT GROUP
.....
* NECROPSY FINDINGS

NO NECROPSY OBSERVATIONS NOTED.

* MICROSCOPIC FINDINGS

INJECTION SITE (TAIL):
  Severe autolysis, evaluation not possible
PARATHYROID GLANDS:
  Tissue not present for histologic examination
SPLEEN:
  -Lymphoid hyperplasia follicular, grade 1
ALL OTHER PROTOCOL TISSUES WITHOUT PATHOLOGIC FINDINGS.
-----

```



PATHOLOGY REPORT  
INDIVIDUAL ANIMAL DATA

PROJECT :SB-SU-003

TEST ITEM : [18F]FP-R01-MG-F2  
TEST SYSTEM : RAT(SPR.DAWL.), 1 Day, I.V.  
SPONSOR : Stanford University School

PATHOL. NO.: 14041 DSG  
DATE : 05-DEC-14  
PATHDATA SYSTEM V6.2c2

ANIMAL HEADING DATA

DOSE GROUP : 2, Group 2

| ANIMAL NUMBER | SEX M/F | DEFINED STATE | AND FINAL STATE OF NECROPSY | TEST DAYS | FIRST AND LAST DAY UNDER TEST | DATE OF NECROPSY |
|---------------|---------|---------------|-----------------------------|-----------|-------------------------------|------------------|
| 811           | M       | K0            | K0                          | 3         | 07-OCT-14                     | 09-OCT-14        |
| 812           | M       | K0            | K0                          | 3         | 07-OCT-14                     | 09-OCT-14        |
| 813           | M       | K0            | K0                          | 3         | 07-OCT-14                     | 09-OCT-14        |
| 814           | M       | K0            | K0                          | 3         | 07-OCT-14                     | 09-OCT-14        |
| 815           | M       | K0            | K0                          | 3         | 07-OCT-14                     | 09-OCT-14        |
| 816           | M       | R1            | R1                          | 15        | 07-OCT-14                     | 21-OCT-14        |
| 817           | M       | R1            | R1                          | 15        | 07-OCT-14                     | 21-OCT-14        |
| 818           | M       | R1            | R1                          | 15        | 07-OCT-14                     | 21-OCT-14        |
| 819           | M       | R1            | R1                          | 15        | 07-OCT-14                     | 21-OCT-14        |
| 820           | M       | R1            | R1                          | 15        | 07-OCT-14                     | 21-OCT-14        |
| 833           | F       | K0            | K0                          | 3         | 07-OCT-14                     | 09-OCT-14        |
| 834           | F       | K0            | K0                          | 3         | 07-OCT-14                     | 09-OCT-14        |
| 835           | F       | K0            | K0                          | 3         | 07-OCT-14                     | 09-OCT-14        |
| 836           | F       | K0            | K0                          | 3         | 07-OCT-14                     | 09-OCT-14        |
| 837           | F       | K0            | K0                          | 3         | 07-OCT-14                     | 09-OCT-14        |
| 838           | F       | R1            | R1                          | 15        | 07-OCT-14                     | 21-OCT-14        |
| 839           | F       | R1            | R1                          | 15        | 07-OCT-14                     | 21-OCT-14        |
| 840           | F       | R1            | R1                          | 15        | 07-OCT-14                     | 21-OCT-14        |
| 841           | F       | R1            | R1                          | 15        | 07-OCT-14                     | 21-OCT-14        |
| 842           | F       | R1            | R1                          | 15        | 07-OCT-14                     | 21-OCT-14        |

PATHOLOGY REPORT  
INDIVIDUAL ANIMAL DATA PROJECT :SB-SU-003

---

TEST ITEM : [18F]FP-R01-MG-F2 PATHOL. NO.: 14041 DSG  
TEST SYSTEM : RAT(SPR.DAWL.), 1 Day, I.V. DATE : 05-DEC-14  
SPONSOR : Stanford University School PATHDATA SYSTEM V6.2c2

---

TEXT OF GROSS AND MICROSCOPIC FINDINGS  
DOSE GROUP : 2, Group 2

---

\* ANIMAL NUMBER : 811 SEX : MALE  
FIRST DAY ON TEST : 07-Oct-14  
LAST DAY ON TEST : 09-Oct-14  
DAYS ON TEST : 3  
DATE OF NECROPSY : 09-Oct-14  
DEFINED SACR.GROUP : TERMINAL SACRIFICE GROUP  
STATUS AT NECROPSY : TERMINAL SACRIFICE GROUP

.....

\* NECROPSY FINDINGS  
NO NECROPSY OBSERVATIONS NOTED.

\* MICROSCOPIC FINDINGS  
NO MICROSCOPIC FINDINGS NOTED.

---

PATHOLOGY REPORT  
INDIVIDUAL ANIMAL DATA PROJECT :SB-SU-003

---

TEST ITEM : [18F]FP-R01-MG-F2 PATHOL. NO.: 14041 DSG  
TEST SYSTEM : RAT(SPR.DAWL.), 1 Day, I.V. DATE : 05-DEC-14  
SPONSOR : Stanford University School PATHDATA SYSTEM V6.2c2

---

TEXT OF GROSS AND MICROSCOPIC FINDINGS  
DOSE GROUP : 2, Group 2

---

\* ANIMAL NUMBER : 812 SEX : MALE  
FIRST DAY ON TEST : 07-Oct-14  
LAST DAY ON TEST : 09-Oct-14  
DAYS ON TEST : 3  
DATE OF NECROPSY : 09-Oct-14  
DEFINED SACR.GROUP : TERMINAL SACRIFICE GROUP  
STATUS AT NECROPSY : TERMINAL SACRIFICE GROUP

.....

\* NECROPSY FINDINGS

NO NECROPSY OBSERVATIONS NOTED.

\* MICROSCOPIC FINDINGS

NO MICROSCOPIC FINDINGS NOTED.

---

PATHOLOGY REPORT  
INDIVIDUAL ANIMAL DATA

PROJECT :SB-SU-003

---

TEST ITEM : [18F]FP-R01-MG-F2                      PATHOL. NO.: 14041 DSG  
TEST SYSTEM : RAT(SPR.DAWL.), 1 Day, I.V.        DATE : 05-DEC-14  
SPONSOR : Stanford University School            PATHDATA SYSTEM V6.2c2

---

TEXT OF GROSS AND MICROSCOPIC FINDINGS  
DOSE GROUP : 2, Group 2

---

\* ANIMAL NUMBER : 813                            SEX : MALE  
FIRST DAY ON TEST : 07-Oct-14  
LAST DAY ON TEST : 09-Oct-14  
DAYS ON TEST : 3  
DATE OF NECROPSY : 09-Oct-14  
DEFINED SACR.GROUP : TERMINAL SACRIFICE GROUP  
STATUS AT NECROPSY : TERMINAL SACRIFICE GROUP

.....

\* NECROPSY FINDINGS

NO NECROPSY OBSERVATIONS NOTED.

\* MICROSCOPIC FINDINGS

PARATHYROID GLANDS:  
Tissue not present for histologic examination  
ALL OTHER PROTOCOL TISSUES WITHOUT PATHOLOGIC FINDINGS.

---

PATHOLOGY REPORT  
INDIVIDUAL ANIMAL DATA

---

PROJECT :SB-SU-003

---

TEST ITEM : [18F]FP-R01-MG-F2                      PATHOL. NO.: 14041 DSG  
TEST SYSTEM : RAT(SPR.DAWL.), 1 Day, I.V.        DATE : 05-DEC-14  
SPONSOR : Stanford University School            PATHDATA SYSTEM V6.2c2

---

TEXT OF GROSS AND MICROSCOPIC FINDINGS  
DOSE GROUP : 2, Group 2

---

\* ANIMAL NUMBER : 814                              SEX : MALE  
FIRST DAY ON TEST : 07-Oct-14  
LAST DAY ON TEST : 09-Oct-14  
DAYS ON TEST : 3  
DATE OF NECROPSY : 09-Oct-14  
DEFINED SACR.GROUP : TERMINAL SACRIFICE GROUP  
STATUS AT NECROPSY : TERMINAL SACRIFICE GROUP

.....

\* NECROPSY FINDINGS

NO NECROPSY OBSERVATIONS NOTED.

\* MICROSCOPIC FINDINGS

PARATHYROID GLANDS:  
Only one of paired organs examined/present  
NO MICROSCOPIC FINDINGS NOTED.

---

PATHOLOGY REPORT  
INDIVIDUAL ANIMAL DATA PROJECT :SB-SU-003

---

TEST ITEM : [18F]FP-R01-MG-F2 PATHOL. NO.: 14041 DSG  
TEST SYSTEM : RAT(SPR.DAWL.), 1 Day, I.V. DATE : 05-DEC-14  
SPONSOR : Stanford University School PATHDATA SYSTEM V6.2c2

---

TEXT OF GROSS AND MICROSCOPIC FINDINGS  
DOSE GROUP : 2, Group 2

---

\* ANIMAL NUMBER : 815 SEX : MALE  
FIRST DAY ON TEST : 07-Oct-14  
LAST DAY ON TEST : 09-Oct-14  
DAYS ON TEST : 3  
DATE OF NECROPSY : 09-Oct-14  
DEFINED SACR.GROUP : TERMINAL SACRIFICE GROUP  
STATUS AT NECROPSY : TERMINAL SACRIFICE GROUP

.....

\* NECROPSY FINDINGS

NO NECROPSY OBSERVATIONS NOTED.

\* MICROSCOPIC FINDINGS

NO MICROSCOPIC FINDINGS NOTED.

---

```

PATHOLOGY REPORT
INDIVIDUAL ANIMAL DATA                                PROJECT      :SB-SU-003
-----
TEST ITEM       : [18F]FP-R01-MG-F2                   PATHOL. NO.: 14041 DSG
TEST SYSTEM    : RAT(SPR.DAWL.), 1 Day, I.V.          DATE        : 05-DEC-14
SPONSOR        : Stanford University School           PATHDATA SYSTEM V6.2c2
-----
TEXT OF GROSS AND MICROSCOPIC FINDINGS
DOSE GROUP     : 2, Group 2
-----
* ANIMAL NUMBER           :      816                SEX : MALE
  FIRST DAY ON TEST       : 07-Oct-14
  LAST DAY ON TEST        : 21-Oct-14
  DAYS ON TEST            :      15
  DATE OF NECROPSY        : 21-Oct-14
  DEFINED SACR.GROUP      : RECOVERY / POST-TREATMENT GROUP
  STATUS AT NECROPSY      : RECOVERY / POST-TREATMENT GROUP
.....
* NECROPSY FINDINGS

NO NECROPSY OBSERVATIONS NOTED.

* MICROSCOPIC FINDINGS

INJECTION SITE (TAIL):
  Severe autolysis, evaluation not possible
PARATHYROID GLANDS:
  Tissue not present for histologic examination
THYROID GLAND:
  -Ectopic thymus, unilateral
ALL OTHER PROTOCOL TISSUES WITHOUT PATHOLOGIC FINDINGS.
-----

```

PATHOLOGY REPORT  
INDIVIDUAL ANIMAL DATA

---

|             |                               |                 |             |
|-------------|-------------------------------|-----------------|-------------|
| TEST ITEM   | : [18F]FP-R01-MG-F2           | PATHOL. NO.:    | 14041 DSG   |
| TEST SYSTEM | : RAT(SPR.DAWL.), 1 Day, I.V. | DATE            | : 05-DEC-14 |
| SPONSOR     | : Stanford University School  | PATHDATA SYSTEM | V6.2c2      |

---

TEXT OF GROSS AND MICROSCOPIC FINDINGS  
DOSE GROUP : 2, Group 2

---

\* ANIMAL NUMBER : 817 SEX : MALE  
FIRST DAY ON TEST : 07-Oct-14  
LAST DAY ON TEST : 21-Oct-14  
DAYS ON TEST : 15  
DATE OF NECROPSY : 21-Oct-14  
DEFINED SACR.GROUP : RECOVERY / POST-TREATMENT GROUP  
STATUS AT NECROPSY : RECOVERY / POST-TREATMENT GROUP

.....

\* NECROPSY FINDINGS  
NO NECROPSY OBSERVATIONS NOTED.

\* MICROSCOPIC FINDINGS  
INJECTION SITE (TAIL):  
Severe autolysis, evaluation not possible  
ALL OTHER PROTOCOL TISSUES WITHOUT PATHOLOGIC FINDINGS.

---



```

PATHOLOGY REPORT
INDIVIDUAL ANIMAL DATA                                PROJECT      :SB-SU-003
-----
TEST ITEM       : [18F]FP-R01-MG-F2                   PATHOL. NO.: 14041 DSG
TEST SYSTEM    : RAT(SPR.DAWL.), 1 Day, I.V.          DATE         : 05-DEC-14
SPONSOR        : Stanford University School           PATHDATA SYSTEM V6.2c2
-----
TEXT OF GROSS AND MICROSCOPIC FINDINGS
DOSE GROUP     : 2, Group 2
-----
* ANIMAL NUMBER           :      818                SEX : MALE
  FIRST DAY ON TEST      : 07-Oct-14
  LAST DAY ON TEST       : 21-Oct-14
  DAYS ON TEST           :      15
  DATE OF NECROPSY      : 21-Oct-14
  DEFINED SACR.GROUP     : RECOVERY / POST-TREATMENT GROUP
  STATUS AT NECROPSY    : RECOVERY / POST-TREATMENT GROUP
.....
* NECROPSY FINDINGS

NO NECROPSY OBSERVATIONS NOTED.

* MICROSCOPIC FINDINGS

INJECTION SITE (TAIL):
  Severe autolysis, evaluation not possible
PARATHYROID GLANDS:
  Tissue not present for histologic examination
THYROID GLAND:
  Only one of paired organs examined/present
ALL OTHER PROTOCOL TISSUES WITHOUT PATHOLOGIC FINDINGS.
-----

```

PATHOLOGY REPORT  
INDIVIDUAL ANIMAL DATA PROJECT :SB-SU-003

---

TEST ITEM : [18F]FP-R01-MG-F2 PATHOL. NO.: 14041 DSG  
TEST SYSTEM : RAT(SPR.DAWL.), 1 Day, I.V. DATE : 05-DEC-14  
SPONSOR : Stanford University School PATHDATA SYSTEM V6.2c2

---

TEXT OF GROSS AND MICROSCOPIC FINDINGS  
DOSE GROUP : 2, Group 2

---

\* ANIMAL NUMBER : 819 SEX : MALE  
FIRST DAY ON TEST : 07-Oct-14  
LAST DAY ON TEST : 21-Oct-14  
DAYS ON TEST : 15  
DATE OF NECROPSY : 21-Oct-14  
DEFINED SACR.GROUP : RECOVERY / POST-TREATMENT GROUP  
STATUS AT NECROPSY : RECOVERY / POST-TREATMENT GROUP

.....

\* NECROPSY FINDINGS

NO NECROPSY OBSERVATIONS NOTED.

\* MICROSCOPIC FINDINGS

EYES:  
-Degeneration:cornea, central, unilateral, grade 2  
INJECTION SITE (TAIL):  
Severe autolysis, evaluation not possible  
PARATHYROID GLANDS:  
Only one of paired organs examined/present  
One parathyroid gland present for evaluation.  
THYROID GLAND:  
Only one of paired organs examined/present  
ALL OTHER PROTOCOL TISSUES WITHOUT PATHOLOGIC FINDINGS.

---

```

PATHOLOGY REPORT
INDIVIDUAL ANIMAL DATA                                PROJECT      :SB-SU-003
-----
TEST ITEM       : [18F]FP-R01-MG-F2                    PATHOL. NO.: 14041 DSG
TEST SYSTEM    : RAT(SPR.DAWL.), 1 Day, I.V.           DATE         : 05-DEC-14
SPONSOR        : Stanford University School            PATHDATA SYSTEM V6.2c2
-----
TEXT OF GROSS AND MICROSCOPIC FINDINGS
DOSE GROUP     : 2, Group 2
-----
* ANIMAL NUMBER           :      820                    SEX : MALE
  FIRST DAY ON TEST      : 07-Oct-14
  LAST DAY ON TEST      : 21-Oct-14
  DAYS ON TEST          :      15
  DATE OF NECROPSY     : 21-Oct-14
  DEFINED SACR.GROUP    : RECOVERY / POST-TREATMENT GROUP
  STATUS AT NECROPSY   : RECOVERY / POST-TREATMENT GROUP
.....
* NECROPSY FINDINGS

NO NECROPSY OBSERVATIONS NOTED.

* MICROSCOPIC FINDINGS

INJECTION SITE (TAIL):
  Severe autolysis, evaluation not possible
PARATHYROID GLANDS:
  Only one of paired organs examined/present
THYROID GLAND:
  -Ectopic thymus, unilateral
ALL OTHER PROTOCOL TISSUES WITHOUT PATHOLOGIC FINDINGS.
-----

```

PATHOLOGY REPORT  
INDIVIDUAL ANIMAL DATA

---

PROJECT :SB-SU-003

---

TEST ITEM : [18F]FP-R01-MG-F2  
TEST SYSTEM : RAT(SPR.DAWL.), 1 Day, I.V.  
SPONSOR : Stanford University School

PATHOL. NO.: 14041 DSG  
DATE : 05-DEC-14  
PATHDATA SYSTEM V6.2c2

---

TEXT OF GROSS AND MICROSCOPIC FINDINGS  
DOSE GROUP : 2, Group 2

---

\* ANIMAL NUMBER : 833 SEX : FEMALE  
FIRST DAY ON TEST : 07-Oct-14  
LAST DAY ON TEST : 09-Oct-14  
DAYS ON TEST : 3  
DATE OF NECROPSY : 09-Oct-14  
DEFINED SACR.GROUP : TERMINAL SACRIFICE GROUP  
STATUS AT NECROPSY : TERMINAL SACRIFICE GROUP

.....

\* NECROPSY FINDINGS

NO NECROPSY OBSERVATIONS NOTED.

\* MICROSCOPIC FINDINGS

PARATHYROID GLANDS:  
Only one of paired organs examined/present  
NO MICROSCOPIC FINDINGS NOTED.

---

PATHOLOGY REPORT  
INDIVIDUAL ANIMAL DATA

---

|             |                               |                 |             |
|-------------|-------------------------------|-----------------|-------------|
| TEST ITEM   | : [18F]FP-R01-MG-F2           | PROJECT         | : SB-SU-003 |
| TEST SYSTEM | : RAT(SPR.DAWL.), 1 Day, I.V. | PATHOL. NO.:    | 14041 DSG   |
| SPONSOR     | : Stanford University School  | DATE            | : 05-DEC-14 |
|             |                               | PATHDATA SYSTEM | V6.2c2      |

---

TEXT OF GROSS AND MICROSCOPIC FINDINGS  
DOSE GROUP : 2, Group 2

---

|                    |                            |     |          |
|--------------------|----------------------------|-----|----------|
| * ANIMAL NUMBER    | : 834                      | SEX | : FEMALE |
| FIRST DAY ON TEST  | : 07-Oct-14                |     |          |
| LAST DAY ON TEST   | : 09-Oct-14                |     |          |
| DAYS ON TEST       | : 3                        |     |          |
| DATE OF NECROPSY   | : 09-Oct-14                |     |          |
| DEFINED SACR.GROUP | : TERMINAL SACRIFICE GROUP |     |          |
| STATUS AT NECROPSY | : TERMINAL SACRIFICE GROUP |     |          |

---

\* NECROPSY FINDINGS

NO NECROPSY OBSERVATIONS NOTED.

\* MICROSCOPIC FINDINGS

NO MICROSCOPIC FINDINGS NOTED.

---

PATHOLOGY REPORT  
INDIVIDUAL ANIMAL DATA

PROJECT :SB-SU-003

---

TEST ITEM : [18F]FP-R01-MG-F2  
TEST SYSTEM : RAT(SPR.DAWL.), 1 Day, I.V.  
SPONSOR : Stanford University School

PATHOL. NO.: 14041 DSG  
DATE : 05-DEC-14  
PATHDATA SYSTEM V6.2c2

---

TEXT OF GROSS AND MICROSCOPIC FINDINGS  
DOSE GROUP : 2, Group 2

---

\* ANIMAL NUMBER : 835 SEX : FEMALE  
FIRST DAY ON TEST : 07-Oct-14  
LAST DAY ON TEST : 09-Oct-14  
DAYS ON TEST : 3  
DATE OF NECROPSY : 09-Oct-14  
DEFINED SACR.GROUP : TERMINAL SACRIFICE GROUP  
STATUS AT NECROPSY : TERMINAL SACRIFICE GROUP

.....

\* NECROPSY FINDINGS  
NO NECROPSY OBSERVATIONS NOTED.

\* MICROSCOPIC FINDINGS  
PARATHYROID GLANDS:  
Tissue not present for histologic examination  
ALL OTHER PROTOCOL TISSUES WITHOUT PATHOLOGIC FINDINGS.

---

PATHOLOGY REPORT  
INDIVIDUAL ANIMAL DATA

---

PROJECT :SB-SU-003

---

TEST ITEM : [18F]FP-R01-MG-F2  
TEST SYSTEM : RAT(SPR.DAWL.), 1 Day, I.V.  
SPONSOR : Stanford University School

PATHOL. NO.: 14041 DSG  
DATE : 05-DEC-14  
PATHDATA SYSTEM V6.2c2

---

TEXT OF GROSS AND MICROSCOPIC FINDINGS  
DOSE GROUP : 2, Group 2

---

\* ANIMAL NUMBER : 836 SEX : FEMALE  
FIRST DAY ON TEST : 07-Oct-14  
LAST DAY ON TEST : 09-Oct-14  
DAYS ON TEST : 3  
DATE OF NECROPSY : 09-Oct-14  
DEFINED SACR.GROUP : TERMINAL SACRIFICE GROUP  
STATUS AT NECROPSY : TERMINAL SACRIFICE GROUP

.....

\* NECROPSY FINDINGS

NO NECROPSY OBSERVATIONS NOTED.

\* MICROSCOPIC FINDINGS

INJECTION SITE (TAIL):  
-Inflammation:perivascular, grade 2  
ALL OTHER PROTOCOL TISSUES WITHOUT PATHOLOGIC FINDINGS.

---

PATHOLOGY REPORT  
INDIVIDUAL ANIMAL DATA

---

PROJECT :SB-SU-003

---

TEST ITEM : [18F]FP-R01-MG-F2  
TEST SYSTEM : RAT(SPR.DAWL.), 1 Day, I.V.  
SPONSOR : Stanford University School

PATHOL. NO.: 14041 DSG  
DATE : 05-DEC-14  
PATHDATA SYSTEM V6.2c2

---

TEXT OF GROSS AND MICROSCOPIC FINDINGS  
DOSE GROUP : 2, Group 2

---

\* ANIMAL NUMBER : 837 SEX : FEMALE  
FIRST DAY ON TEST : 07-Oct-14  
LAST DAY ON TEST : 09-Oct-14  
DAYS ON TEST : 3  
DATE OF NECROPSY : 09-Oct-14  
DEFINED SACR.GROUP : TERMINAL SACRIFICE GROUP  
STATUS AT NECROPSY : TERMINAL SACRIFICE GROUP

---

\* NECROPSY FINDINGS

NO NECROPSY OBSERVATIONS NOTED.

\* MICROSCOPIC FINDINGS

PARATHYROID GLANDS:  
Only one of paired organs examined/present  
NO MICROSCOPIC FINDINGS NOTED.

---



PATHOLOGY REPORT  
INDIVIDUAL ANIMAL DATA

---

PROJECT :SB-SU-003

---

TEST ITEM : [18F]FP-R01-MG-F2  
TEST SYSTEM : RAT(SPR.DAWL.), 1 Day, I.V.  
SPONSOR : Stanford University School

PATHOL. NO.: 14041 DSG  
DATE : 05-DEC-14  
PATHDATA SYSTEM V6.2c2

---

TEXT OF GROSS AND MICROSCOPIC FINDINGS  
DOSE GROUP : 2, Group 2

---

\* ANIMAL NUMBER : 838 SEX : FEMALE  
FIRST DAY ON TEST : 07-Oct-14  
LAST DAY ON TEST : 21-Oct-14  
DAYS ON TEST : 15  
DATE OF NECROPSY : 21-Oct-14  
DEFINED SACR.GROUP : RECOVERY / POST-TREATMENT GROUP  
STATUS AT NECROPSY : RECOVERY / POST-TREATMENT GROUP

---

\* NECROPSY FINDINGS

NO NECROPSY OBSERVATIONS NOTED.

\* MICROSCOPIC FINDINGS

INJECTION SITE (TAIL):  
Severe autolysis, evaluation not possible  
PARATHYROID GLANDS:  
Only one of paired organs examined/present  
ALL OTHER PROTOCOL TISSUES WITHOUT PATHOLOGIC FINDINGS.

---

PATHOLOGY REPORT  
INDIVIDUAL ANIMAL DATA

---

PROJECT :SB-SU-003

---

TEST ITEM : [18F]FP-R01-MG-F2  
TEST SYSTEM : RAT(SPR.DAWL.), 1 Day, I.V.  
SPONSOR : Stanford University School

PATHOL. NO.: 14041 DSG  
DATE : 05-DEC-14  
PATHDATA SYSTEM V6.2c2

---

TEXT OF GROSS AND MICROSCOPIC FINDINGS  
DOSE GROUP : 2, Group 2

---

\* ANIMAL NUMBER : 839 SEX : FEMALE  
FIRST DAY ON TEST : 07-Oct-14  
LAST DAY ON TEST : 21-Oct-14  
DAYS ON TEST : 15  
DATE OF NECROPSY : 21-Oct-14  
DEFINED SACR.GROUP : RECOVERY / POST-TREATMENT GROUP  
STATUS AT NECROPSY : RECOVERY / POST-TREATMENT GROUP

---

\* NECROPSY FINDINGS

NO NECROPSY OBSERVATIONS NOTED.

\* MICROSCOPIC FINDINGS

INJECTION SITE (TAIL):  
Severe autolysis, evaluation not possible  
PARATHYROID GLANDS:  
Tissue not present for histologic examination  
ALL OTHER PROTOCOL TISSUES WITHOUT PATHOLOGIC FINDINGS.

---

PATHOLOGY REPORT  
INDIVIDUAL ANIMAL DATA

---

|             |                               |                 |             |
|-------------|-------------------------------|-----------------|-------------|
| TEST ITEM   | : [18F]FP-R01-MG-F2           | PROJECT         | : SB-SU-003 |
| TEST SYSTEM | : RAT(SPR.DAWL.), 1 Day, I.V. | PATHOL. NO.:    | 14041 DSG   |
| SPONSOR     | : Stanford University School  | DATE            | : 05-DEC-14 |
|             |                               | PATHDATA SYSTEM | V6.2c2      |

---

TEXT OF GROSS AND MICROSCOPIC FINDINGS  
DOSE GROUP : 2, Group 2

---

\* ANIMAL NUMBER : 840 SEX : FEMALE  
FIRST DAY ON TEST : 07-Oct-14  
LAST DAY ON TEST : 21-Oct-14  
DAYS ON TEST : 15  
DATE OF NECROPSY : 21-Oct-14  
DEFINED SACR.GROUP : RECOVERY / POST-TREATMENT GROUP  
STATUS AT NECROPSY : RECOVERY / POST-TREATMENT GROUP

---

\* NECROPSY FINDINGS

NO NECROPSY OBSERVATIONS NOTED.

\* MICROSCOPIC FINDINGS

INJECTION SITE (TAIL):  
Severe autolysis, evaluation not possible  
PARATHYROID GLANDS:  
Only one of paired organs examined/present  
ALL OTHER PROTOCOL TISSUES WITHOUT PATHOLOGIC FINDINGS.

---

PATHOLOGY REPORT  
INDIVIDUAL ANIMAL DATA

---

PROJECT :SB-SU-003

---

TEST ITEM : [18F]FP-R01-MG-F2  
TEST SYSTEM : RAT(SPR.DAWL.), 1 Day, I.V.  
SPONSOR : Stanford University School

PATHOL. NO.: 14041 DSG  
DATE : 05-DEC-14  
PATHDATA SYSTEM V6.2c2

---

TEXT OF GROSS AND MICROSCOPIC FINDINGS  
DOSE GROUP : 2, Group 2

---

\* ANIMAL NUMBER : 841 SEX : FEMALE  
FIRST DAY ON TEST : 07-Oct-14  
LAST DAY ON TEST : 21-Oct-14  
DAYS ON TEST : 15  
DATE OF NECROPSY : 21-Oct-14  
DEFINED SACR.GROUP : RECOVERY / POST-TREATMENT GROUP  
STATUS AT NECROPSY : RECOVERY / POST-TREATMENT GROUP

---

\* NECROPSY FINDINGS

NO NECROPSY OBSERVATIONS NOTED.

\* MICROSCOPIC FINDINGS

INJECTION SITE (TAIL):  
Severe autolysis, evaluation not possible  
PARATHYROID GLANDS:  
Tissue not present for histologic examination  
ALL OTHER PROTOCOL TISSUES WITHOUT PATHOLOGIC FINDINGS.

---

```

PATHOLOGY REPORT
INDIVIDUAL ANIMAL DATA                                PROJECT      :SB-SU-003
-----
TEST ITEM       : [18F]FP-R01-MG-F2                   PATHOL. NO.: 14041 DSG
TEST SYSTEM    : RAT(SPR.DAWL.), 1 Day, I.V.          DATE         : 05-DEC-14
SPONSOR        : Stanford University School           PATHDATA SYSTEM V6.2c2
-----
TEXT OF GROSS AND MICROSCOPIC FINDINGS
DOSE GROUP     : 2, Group 2
-----
* ANIMAL NUMBER           :      842                SEX : FEMALE
  FIRST DAY ON TEST       : 07-Oct-14
  LAST DAY ON TEST        : 21-Oct-14
  DAYS ON TEST            :      15
  DATE OF NECROPSY        : 21-Oct-14
  DEFINED SACR.GROUP      : RECOVERY / POST-TREATMENT GROUP
  STATUS AT NECROPSY     : RECOVERY / POST-TREATMENT GROUP
.....
* NECROPSY FINDINGS

NO NECROPSY OBSERVATIONS NOTED.

* MICROSCOPIC FINDINGS

INJECTION SITE (TAIL):
  Severe autolysis, evaluation not possible
PARATHYROID GLANDS:
  Tissue not present for histologic examination
THYROID GLAND:
  Only one of paired organs examined/present
ALL OTHER PROTOCOL TISSUES WITHOUT PATHOLOGIC FINDINGS.
-----

```

Final Pathology Report  
Stanford University School of Medicine  
SoBran Study Number SB-SU-003

## Appendix B. Quality Assurance Statement

# HSRL HistoScientific Research Laboratories

## QUALITY ASSURANCE STATEMENT

Study Title: 14-Day Single Intravenous Dose Toxicity Study of [18F]FP-R01-MG-F2 in Sprague Dawley Rats

Client Study Number: SB-SU-003

This histopathology project has been inspected and audited by the HSRL Quality Assurance Unit (QAU) as required by the Good Laboratory Practice (GLP) regulations disseminated by the U.S. Food and Drug Administration (FDA, 21 CFR 58).

| <u>Area Inspected</u> |           | <u>Dates</u>                  |                             |                             |
|-----------------------|-----------|-------------------------------|-----------------------------|-----------------------------|
|                       |           | <u>Inspection<sup>1</sup></u> | <u>Reported<sup>2</sup></u> | <u>Reported<sup>3</sup></u> |
| Critical Phase:       | Embedding | 05NOV14                       | 11NOV14                     | 11NOV14                     |
| Data Review           |           | 07,10-11NOV14                 | 17NOV14                     | 17NOV14                     |
| Pathology Report:     | Draft     | 19-20NOV14                    | 21NOV14                     | 21NOV14                     |
|                       | Final     | 04-05DEC14                    | 05DEC14                     | 05DEC14                     |

All the results/conclusions of the pathology report accurately reflect the raw data.

<sup>1</sup> Date(s) of inspection

<sup>2</sup> Date(s) inspections reported to HSRL Laboratory Director/Test Site Management, Principal Investigator/HSRL Study Pathologist

<sup>3</sup> Date(s) inspections reported to Study Director, Test Facility Management, and Lead QA (if appropriate)

  
Victoria L. Cook, RQAP-GLP  
Quality Assurance Auditor

  
Date

**APPENDIX D – CERTIFICATE OF ANALYSIS FOR VEHICLE COMPONENTS AND  
TEST ARTICLE**



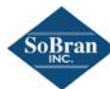

SB-SU-003

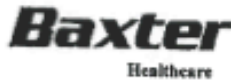

TRUE AND EXACT COPY

*RF* 10/17/14  
INITIAL / DATE

MEDICATION DELIVERY  
NORTH COVE FACILITY  
Hwy 221 N PO Box 1390  
Marion N.C. 28752  
Telephone: (828) 756-4151  
Fax: (828) 756-4821

**Certificate of Analysis**

Product: 0.9% Sodium Chloride Injection, USP  
Lot #: C886374  
Code: 2B1321  
Manufacture/  
Sterilization Date: 11/12/2012  
Expiry: 11/2014

Chemical Testing per Specification: 03-15-19-061

Issue Date: 10/3/2008

| TEST              | LIMIT                   | RESULT   |
|-------------------|-------------------------|----------|
| NaCl (g/L)        | 8.55 - 9.45 g/L         | 8.88 g/L |
| Sodium ID         | Positive                | Positive |
| Sodium ID- Flame  | Positive                | Positive |
| pH at 25 deg. C   | 4.5 - 7.0               | 5.6      |
| Particle Analysis | NMT 25 ≥ 10 um/ml       | NMT 25   |
| Particle Analysis | NMT 3 ≥ 25 um/ml        | NMT 3    |
| Sterility         | Pass Parametric Release | Pass     |

Limulus Testing per 13-01-V

| RESULT       | LIMIT        | DISPOSITION | DATE PASSED |
|--------------|--------------|-------------|-------------|
| < 0.25 EU/ml | < 0.25 EU/ml | Pass        | 12/19/2012  |

This is to certify that this product was manufactured according to current GMP and fulfills the requirements of the Master Production Document.

| Date Batch Released | Parametric Release Date | Quantity Released |
|---------------------|-------------------------|-------------------|
| 12/19/2012          | 12/19/2012              | NA                |

|                                             | Print Name      | Signature/Date                     |
|---------------------------------------------|-----------------|------------------------------------|
| Prepared by:                                | Sherrice Hopson | Sherrice Hopson 1/6/13             |
| Approved by:<br>Quality Manager or Designee | Keith Hawk      | Keith Hawk 1/2/13 for<br>S. Hudson |

SB-SU-003

**SIGMA-ALDRICH**

TRUE AND EXACT COPY

*RJ* 10/17/14  
INITIAL / DATE

3050 Spruce Street, Saint Louis, MO 63103 USA

Website: [www.sigmaaldrich.com](http://www.sigmaaldrich.com)

Email USA: [techserv@sial.com](mailto:techserv@sial.com)

Outside USA: [eurtechserv@sial.com](mailto:eurtechserv@sial.com)

## Certificate of Analysis

Product Name:

Ethanol - 200 proof, meets USP testing specifications

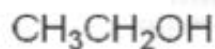

Product Number: 493546  
Lot Number: SHBB0212V  
Brand: SIAL  
CAS Number: 64-17-5  
MDL Number: MFCD00003568  
Formula: C<sub>2</sub>H<sub>6</sub>O  
Formula Weight: 46.07 g/mol  
Quality Release Date: 22 MAR 2011

| Test                                                                                 | Specification         | Result    |
|--------------------------------------------------------------------------------------|-----------------------|-----------|
| Appearance (Color)                                                                   | Colorless             | Colorless |
| Appearance (Form)                                                                    | Liquid                | Liquid    |
| Infrared spectrum                                                                    | Conforms to Structure | Conforms  |
| UV Absorbance 340nm                                                                  | < 0.10                | 0.00      |
| UV Absorbance 270nm                                                                  | < 0.10                | 0.01      |
| UV Absorbance 260nm                                                                  | < 0.30                | 0.04      |
| UV Absorbance 250nm                                                                  | < 0.30                | 0.11      |
| UV Absorbance 240nm                                                                  | < 0.40                | 0.27      |
| UV Absorbance (340 - 235nm)<br>Absorption Curve is Smooth                            | Pass                  | Pass      |
| Appearance (Clarity)<br>Clear (as compared to Opalescence Reference<br>Suspension A) | Pass                  | Pass      |
| Purity (GC)                                                                          | ≥ 99.50%              | 99.87%    |
| Impurity                                                                             | < 2ppm                | < 1ppm    |
| Benzene                                                                              |                       |           |
| Impurity as Acetaldehyde                                                             | < 10ppm               | < 1ppm    |
| Impurity as Methanol                                                                 | < 100ppm              | < 1ppm    |
| Impurity as Other Contaminants                                                       | < 300ppm              | < 1ppm    |

Sigma-Aldrich warrants, that at the time of the quality release or subsequent retest date this product conformed to the information contained in this publication. The current Specification sheet may be available at [Sigma-Aldrich.com](http://Sigma-Aldrich.com). For further inquiries, please contact Technical Service. Purchaser must determine the suitability of the product for its particular use. See reverse side of invoice or packing slip for additional terms and conditions of sale.

Version Number: 1

Page 1 of 2

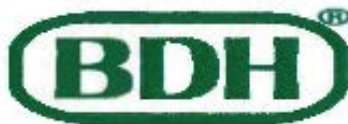

SB-SU-003

Page: 1  
Date: 01/08/13 at 12:45 PM

Certificate of Analysis / QC Results

TRUE AND EXACT COPY  
*[Signature]* 10/17/14  
INITIAL / DATE

|                                                                                                        |                         |                 |               |
|--------------------------------------------------------------------------------------------------------|-------------------------|-----------------|---------------|
| <b>Packaged Product:</b> Alternate code: BDH3419<br>Product Code: 436D<br>HYDROCHLORIC ACID 5.0 NORMAL |                         |                 |               |
| <b>Test</b>                                                                                            | <b>Target/UOM</b>       | <b>Range</b>    | <b>Result</b> |
| PREPARED TO FORMULATION ON FILE                                                                        | YES                     |                 | YES           |
| APPEARANCE AND COLOR                                                                                   | CLEAR LIQUID APPEARANCE |                 | PASS          |
| INSTRUMENTS USED DURING PREPARATION                                                                    | INSTRUMENT              |                 | T-D1,T-143    |
| NORMALITY                                                                                              | 5.0000<br>ACT NORMALITY | 4.9800 - 5.0200 | 4.9890        |
| EXPIRATION DATE                                                                                        | MM/DD/YY<br>EXP DATE    |                 | 01/30/15      |
| COLOR (APHA)                                                                                           | < 10                    |                 | 0             |
| N.I.S.T. Traceable to SRM 723                                                                          | YES                     |                 | YES           |
| <b>Lot #</b>                                                                                           | 2123149                 |                 |               |
| <b>Made</b>                                                                                            | 01/08/13                |                 |               |

RM: 9765 WATER DEIONIZED REAGENT GRADE  
T: DAILY

RM: H2505 HYDROCHLORIC ACID 37% REAGENT ACS  
Lot: 227610

This is to certify that the product listed above has been prepared according to the agreed-upon formulation. The solutions producer has a Quality Management System which governs each step of the manufacturing process to insure the production of a consistent product. Traceability from the producer's lot numbers to the original manufacturer's lot numbers is maintained. The lot number and description of each raw material used to prepare this product are listed above. Certificates of Analysis for these individual raw materials are available upon request.

The weights and/or volumes used to prepare this product are N.I.S.T. Traceable. All balances used in the preparation of product are calibrated daily against N.I.S.T. Traceable weights. The balances are maintained and serviced on a regular basis by an outside certified company. All volumetric glassware used is N.I.S.T. Traceable and certified as meeting Class A specifications.

Unless otherwise agreed upon, all chemicals used in the preparation of this product are Reagent ACS grade.

*Sheila Nelson*  
Quality Manager  
Aqua Solutions

SB-SU-003

Sodium Hydroxide, 5N Volumetric Solution  
BAKER ANALYZED® Reagent

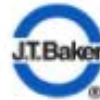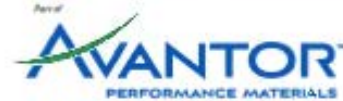

TRUE AND EXACT COPY  
*[Signature]* 10/17/14  
INITIAL / DATE

Material No.: 5671-02  
Batch No.: 0000071409  
Manufactured Date: 2014/02/12  
Expiration Date: 2016/02/12

### Certificate of Analysis

Nist Number & Date - 841 /PT

| Test                                 | Specification | Result |
|--------------------------------------|---------------|--------|
| Appearance (Clear, colorless liquid) | Passes Test   | PT     |
| Normality                            | 4.95 - 5.05   | 5.01   |
| Chloride (Cl)                        | <= 5 ppm      | < 3    |
| ACS - Heavy Metals (as Pb)           | <= 1 ppm      | < 1    |
| Trace Impurities - Iron (Fe)         | <= 0.5 ppm    | < 0.3  |

For Laboratory, Research or Manufacturing Use

Standardization at 25°C traceable to NIST Standard Reference Material.

Storage Conditions: Protect from air to avoid absorption of carbon dioxide.

Country of Origin: US

Packaging Site: Paris Mfg Ctr & DC

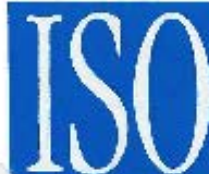

Phillipsburg, NJ 9001:2008, 14001:2004  
Paris, KY 9001:2008  
Mexico City, Mexico 9001:2008  
Deventer, The Netherlands 9001:2008, 14001:2004, 13485:2003  
Gliwice, Poland 9001:2008, 17025:2005  
Selangor, Malaysia 9001:2008  
Dehradun, India, 9001:2008, 14001:2004, 13485:2003  
Mumbai, India, 9001:2008, 17025:2005  
Pune, India 9001:2008

*[Signature]*

Richard M Siberski  
Vice President Global Quality

For questions on this Certificate of Analysis please contact Technical Services at 855.282.6867 or -1.610.573.2600  
Avantor™ Performance Materials Inc.

3477 Corporate Parkway, Suite #200, Center Valley, PA 18034. U.S.A. Phone: 610.573.2600 . Fax: 610.573.2610

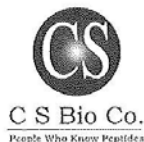

## Quality Control Record

**Product:** FP-Gly-36-Gly-NH<sub>2</sub>  
**Sequence:** FP-Gly-Cys-Ile-Leu-Asn-Gly-Arg-Thr-Asp-Leu-  
Gly-Thr-Leu-Leu-Phe-Arg-Cys-Arg-Arg-Asp-  
Ser-Asp-Cys-Pro-Gly-Ala-Cys-Ile-Cys-Arg-  
Gly-Asn-Gly-Tyr-Cys-Gly-NH<sub>2</sub>

Note: C:C = disulfide bond

Catalog No.: CS12213-P2    Expected M.W.: 3904.46    Found M.W.: 3905.55    Lot : N149

**APPEARANCE:** White Powder

**MOLECULAR WEIGHT VERIFICATION:** Confirmed

**PURITY:** By HPLC in TFA System: 95.48%  
Gradient: 25-46% Buffer B in 20 minutes  
Buffer A: 0.1% TFA in H<sub>2</sub>O  
Buffer B: 0.1% TFA in ACN

**SUGGESTIONS FOR PEPTIDE DISSOLUTION:** Water / Acetonitrile

**COUNTERIONS PRESENT:** TFA

**STORAGE:** All peptides should be stored dry at -20°C

This material is not listed as hazardous by •NIOSH/RTECS. Therefore, no MATERIAL SAFETY DATA SHEET is required. However, the chemical, physical and toxicological properties of this product have not been thoroughly investigated. Therefore, please exercise due care when handling this material. This action is in compliance with State and Federal OSHA standards and regulations.

Quality Control: kylin Li

Date: July 16<sup>th</sup>, 2014

**C S Bio Co.**

20 Kelly Court, Menlo Park, CA 94025 USA  
Tel: 650-322-1111 • Fax: 650-322-2278 • Web: www.csbio.com • Email: peptides@csbio.com

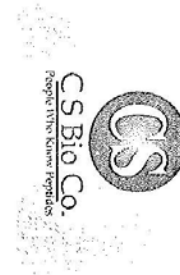

Compound: CS12213-P2

FP-Gly-36-Gly-NH<sub>2</sub>

Lot Number: N149

Expected M.W.: 3904.46

Found M.W.: 3905.55

FILE: 140718115023#17 RT: 0.44 AV: 1 NL: 416E7  
T: +c ESI Full.ms [200.00-2000.00]

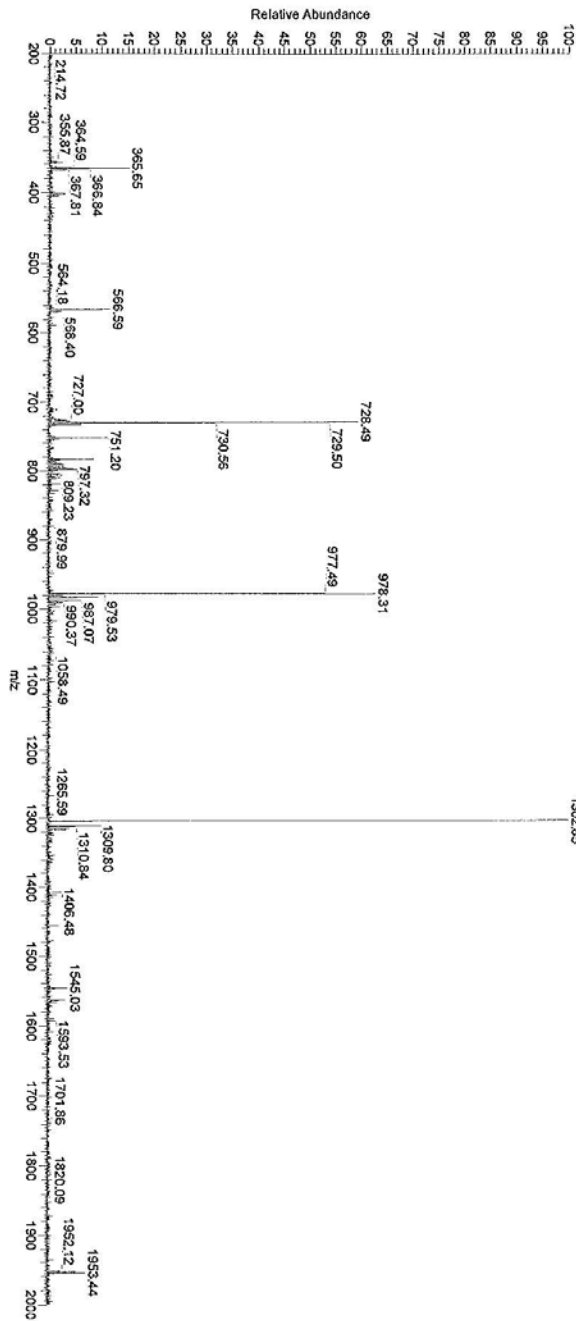

Data file : D:\MYDATA\JUL2014\WG\_2014-07-11\_722\1BC-0101.D  
Sample Name: 12213-P2-FINAL 1

```
=====
Injection Date : Fri, 11. Jul. 2014      Seq Line :      1
Sample Name    : 12213-P2-FINAL          Location  :      P1-B-03
Acq Operator   : WG                      Inj. No.  :      1
Acq. Method    :                        Inj. Vol.  :     20 µl
Analysis Method : D:\MYDATA\JUL2014\WG_2014-07-11_722\25-46-20-320-200->
Last Changed   : D:\MYDATA\JUL2014\WG_2014-07-11_722\1BC-0101.D\DA.M ->
                                      Wed, 16. Jul. 2014, 04:32:46 pm
                                      (modified after loading)
Column: Poroshell 120 SB-C18, 4.6 x 50mm, 2.7-Micron, P.N.: 689975-902
Buffer A: 0.1%TFA in Water
Buffer B: 0.1%TFA in ACN
Flow Rate: 1ml/min
Gradient: 25% to 46% Buffer B in 20min
```

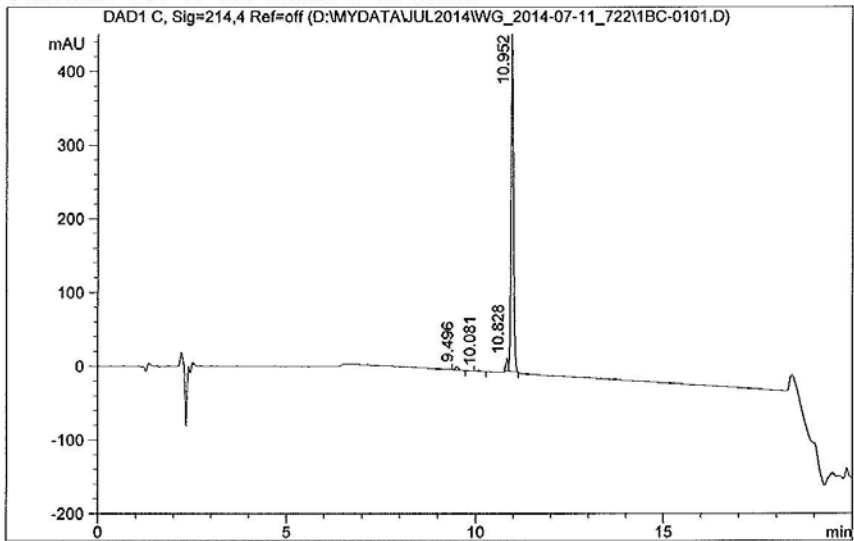

Signal 1: DAD1 C, Sig=214,4 Ref=off

| Peak # | RT [min] | Type | Width [min] | Area     | Area % | Name |
|--------|----------|------|-------------|----------|--------|------|
| 1      | 9.496    | BB   | 0.082       | 26.778   | 1.203  |      |
| 2      | 10.081   | BB   | 0.076       | 11.151   | 0.501  |      |
| 3      | 10.828   | MF   | 0.061       | 62.584   | 2.812  |      |
| 4      | 10.952   | FM   | 0.076       | 2124.753 | 95.483 |      |

\*\*\* End of Report \*\*\*

Date: 7/20/2014  
User: Stanford University  
Sample ID: EP-RICHING-23-72614  
MW: 36911

**AAA**  
Service Laboratory Inc.

Concentration: 688.001 µM  
Est. Concentration (µM): 150

Sequence: GCYGNGRICAGPDCSDRRCFLTGLDTRNLICG

Core Sequence: GCYGNGRICAGPDCSDRRCFLTGLDTRNLICG

| Volume Hydrolyzed (µL) | Ratio Injected | ESQ Values | pmol analyzed | pmol protein | Over +15% | Under 15% | Observed | Theoretical | Concentration (pmol/µL) | Total µgrams | Concentration (ng/mL) | Peptide Content % |
|------------------------|----------------|------------|---------------|--------------|-----------|-----------|----------|-------------|-------------------------|--------------|-----------------------|-------------------|
| 20                     | 0.687          |            | 0             | FALSE        | FALSE     | FALSE     | 0.00     | 0           | 0                       |              |                       |                   |
| 42.955                 |                |            | 46145         | FALSE        | FALSE     | FALSE     | 0.00     | 0           | 5                       | 688.001      | 50.68                 |                   |
| 16.829                 |                |            | 18079         | 9039         | 9039      | 9039      | 5.03     | 2           | 2                       | 137.67       | 10.81                 |                   |
| 8.21                   |                |            | 8820          | FALSE        | FALSE     | FALSE     | 2.01     | 1           | 1                       | 137.67       | 10.81                 |                   |
| 0                      |                |            | 0             | FALSE        | FALSE     | FALSE     | 0.00     | 0           | 0                       |              |                       |                   |
| 8.621                  |                |            | 9261          | 9261         | 9261      | 9261      | 1.01     | 1           | 1                       | 137.67       | 10.81                 |                   |
| 60.35                  |                |            | 64831         | 9262         | 9262      | 9262      | 7.06     | 7           | 7                       | 688.001      | 50.68                 | 68.7%             |
| 9.061                  |                |            | 9734          | 9734         | 9734      | 9734      | 1.06     | 1           | 1                       | 137.67       | 10.81                 |                   |
| 0                      |                |            | 0             | FALSE        | FALSE     | FALSE     | 0.00     | 0           | 0                       |              |                       |                   |
| 15.967                 |                |            | 17159         | FALSE        | FALSE     | FALSE     | 0.00     | 0           | 0                       |              |                       |                   |
| 33.294                 |                |            | 35766         | 8941         | 8941      | 8941      | 1.87     | 2           | 2                       | 275.34       | 21.62                 |                   |
| 6.296                  |                |            | 37766         | 8941         | 8941      | 8941      | 1.87     | 2           | 2                       | 275.34       | 21.62                 |                   |
| 8.487                  |                |            | 9117          | FALSE        | FALSE     | FALSE     | 0.99     | 4           | 4                       | 510.68       | 40.85                 |                   |
| 9.051                  |                |            | 9723          | 9723         | 9723      | 9723      | 0.99     | 1           | 1                       | 137.67       | 10.81                 |                   |
| 0                      |                |            | 0             | FALSE        | FALSE     | FALSE     | 0.00     | 0           | 0                       |              |                       |                   |
| 0                      |                |            | 0             | FALSE        | FALSE     | FALSE     | 0.00     | 0           | 0                       |              |                       |                   |
| 34.659                 |                |            | 37232         | FALSE        | FALSE     | FALSE     | 0.00     | 0           | 0                       |              |                       |                   |
| 1.07                   |                |            | 9308          | 9308         | 9308      | 9308      | 4.05     | 4           | 4                       | 510.68       | 40.85                 |                   |
| Total                  |                | 253.694    | 265960        |              |           |           | 29       | 29          | Total aas               |              |                       |                   |



## **APPENDIX E – STATISTICAL REPORT**

## Statistical Report for Study SB-SU-003

Patrick E. McKnight, Ph.D.

November 25, 2014

The following brief report summarizes a statistical analysis comparing two groups of treated animals according to the SB-SU-003 study protocol. Two groups (Groups 1 and 2) had total body weight (Days 1, 2 (Day 3 cohort only; pre-fasting), 3 (Day 3 cohort only; post-fasting), 8, 14 (pre-fasting) and 15 (post-fasting)) and organ weights (Days 3 and 15 by cohort) supplied in three separate comma separated text files. Each of the following analyses used original data without any transformations or alterations to the data.

### Statistical Analyses Summary

All analyses reported below were conducted using the statistical package R version 3.1.2 (for ANOVA using the `aov` function) and the `multcomp` package for Dunnett's t-tests. Documentation for these statistical packages are available at the following URL's:

R: <http://www.r-project.org>

`multcomp`: <http://cran.r-project.org/web/packages/multcomp>

Statistics reflect differences within sex where the contrast comparison was Group 1 (negative control) and all critical p-values were set a priori at 0.05 (two-sided) but adjusted according to the Dunnett post-hoc comparison method.

### Basic Descriptive Statistics

#### Body Weight Means and Standard Deviations

| Group | Day | Mean   | SD    |
|-------|-----|--------|-------|
| 1     | 1   | 180.60 | 30.11 |
| 1     | 2   | 182.16 | 32.42 |
| 1     | 3   | 175.72 | 32.14 |
| 1     | 8   | 211.85 | 40.55 |
| 1     | 14  | 233.00 | 49.15 |
| 1     | 15  | 224.19 | 49.14 |
| 2     | 1   | 179.93 | 29.08 |

|   |    |        |       |
|---|----|--------|-------|
| 2 | 2  | 183.30 | 31.08 |
| 2 | 3  | 179.47 | 32.85 |
| 2 | 8  | 210.83 | 37.64 |
| 2 | 14 | 232.03 | 47.12 |
| 2 | 15 | 223.16 | 46.06 |

### Organ Weight Means and Standard Deviations

| Group | Organ    | Mean | SD   |
|-------|----------|------|------|
| 1     | Brain    | 1.61 | 0.14 |
| 1     | Day      | 9.00 | 6.16 |
| 1     | Eyes     | 0.29 | 0.03 |
| 1     | Heart    | 0.88 | 0.27 |
| 1     | Kidneys  | 1.61 | 0.30 |
| 1     | Liver    | 7.89 | 2.04 |
| 1     | Lungs    | 1.64 | 0.33 |
| 1     | OvariesF | 0.16 | 0.02 |
| 1     | Spleen   | 0.57 | 0.10 |
| 1     | TestesM  | 3.18 | 0.40 |
| 1     | Thyroid  | 0.03 | 0.02 |
| 2     | Brain    | 1.62 | 0.11 |
| 2     | Day      | 9.00 | 6.16 |
| 2     | Eyes     | 0.30 | 0.04 |
| 2     | Heart    | 0.84 | 0.18 |
| 2     | Kidneys  | 1.63 | 0.35 |
| 2     | Liver    | 8.25 | 2.06 |
| 2     | Lungs    | 1.67 | 0.28 |
| 2     | OvariesF | 0.16 | 0.02 |
| 2     | Spleen   | 0.61 | 0.10 |
| 2     | TestesM  | 3.29 | 0.32 |
| 2     | Thyroid  | 0.03 | 0.01 |

### Body Weight ANOVA models

#### Standard ANOVA results

##### Male Results by Day

Day 1:

|           | Df | Sum Sq | Mean Sq | F value | Pr(>F) |
|-----------|----|--------|---------|---------|--------|
| Group     | 1  | 14.31  | 14.31   | 0.66    | 0.4275 |
| Residuals | 18 | 390.98 | 21.72   |         |        |

Simultaneous Tests for General Linear Hypotheses

Multiple Comparisons of Means: Dunnett Contrasts

Fit: aov(formula = Bodywt ~ Group, data = subset(Body, Sex == "M" &  
Day == 1))

Linear Hypotheses:

|            | Estimate | Std. Error | t value | Pr(> t ) |
|------------|----------|------------|---------|----------|
| 2 - 1 == 0 | -1.692   | 2.084      | -0.812  | 0.428    |

(Adjusted p values reported -- single-step method)

Day 2:

|           | Df | Sum Sq | Mean Sq | F value | Pr(>F) |
|-----------|----|--------|---------|---------|--------|
| Group     | 1  | 0.05   | 0.05    | 0.00    | 0.9742 |
| Residuals | 8  | 361.44 | 45.18   |         |        |

Simultaneous Tests for General Linear Hypotheses

Multiple Comparisons of Means: Dunnett Contrasts

Fit: aov(formula = Bodywt ~ Group, data = subset(Body, Sex == "M" &  
Day == 2))

Linear Hypotheses:

|            | Estimate | Std. Error | t value | Pr(> t ) |
|------------|----------|------------|---------|----------|
| 2 - 1 == 0 | -0.142   | 4.251      | -0.033  | 0.974    |

(Adjusted p values reported -- single-step method)

Day 3:

|           | Df | Sum Sq | Mean Sq | F value | Pr(>F) |
|-----------|----|--------|---------|---------|--------|
| Group     | 1  | 39.60  | 39.60   | 0.58    | 0.4675 |
| Residuals | 8  | 544.62 | 68.08   |         |        |

Simultaneous Tests for General Linear Hypotheses

Multiple Comparisons of Means: Dunnett Contrasts

Fit: aov(formula = Bodywt ~ Group, data = subset(Body, Sex == "M" &  
Day == 3))

Linear Hypotheses:

|            | Estimate | Std. Error | t value | Pr(> t ) |
|------------|----------|------------|---------|----------|
| 2 - 1 == 0 | 3.980    | 5.218      | 0.763   | 0.468    |

(Adjusted p values reported -- single-step method)

Day 8:

|           | Df | Sum Sq | Mean Sq | F value | Pr(>F) |
|-----------|----|--------|---------|---------|--------|
| Group     | 1  | 36.48  | 36.48   | 3.17    | 0.1128 |
| Residuals | 8  | 92.05  | 11.51   |         |        |

Simultaneous Tests for General Linear Hypotheses

Multiple Comparisons of Means: Dunnett Contrasts

Fit: aov(formula = Bodywt ~ Group, data = subset(Body, Sex == "M" & Day == 8))

Linear Hypotheses:

|            | Estimate | Std. Error | t value | Pr(> t ) |
|------------|----------|------------|---------|----------|
| 2 - 1 == 0 | -3.820   | 2.145      | -1.781  | 0.113    |

(Adjusted p values reported -- single-step method)

Day 14:

|           | Df | Sum Sq | Mean Sq | F value | Pr(>F) |
|-----------|----|--------|---------|---------|--------|
| Group     | 1  | 21.43  | 21.43   | 0.69    | 0.4314 |
| Residuals | 8  | 249.81 | 31.23   |         |        |

Simultaneous Tests for General Linear Hypotheses

Multiple Comparisons of Means: Dunnett Contrasts

Fit: aov(formula = Bodywt ~ Group, data = subset(Body, Sex == "M" & Day == 14))

Linear Hypotheses:

|            | Estimate | Std. Error | t value | Pr(> t ) |
|------------|----------|------------|---------|----------|
| 2 - 1 == 0 | -2.928   | 3.534      | -0.828  | 0.431    |

(Adjusted p values reported -- single-step method)

Day 15:

---

|           | Df | Sum Sq | Mean Sq | F value | Pr(>F) |
|-----------|----|--------|---------|---------|--------|
| Group     | 1  | 38.93  | 38.93   | 1.34    | 0.2798 |
| Residuals | 8  | 231.71 | 28.96   |         |        |

---

Simultaneous Tests for General Linear Hypotheses

Multiple Comparisons of Means: Dunnett Contrasts

Fit: aov(formula = Bodywt ~ Group, data = subset(Body, Sex == "M" & Day == 15))

Linear Hypotheses:

|            | Estimate | Std. Error | t value | Pr(> t ) |
|------------|----------|------------|---------|----------|
| 2 - 1 == 0 | -3.946   | 3.404      | -1.159  | 0.28     |

(Adjusted p values reported -- single-step method)

Female Results

Day 1:

---

|           | Df | Sum Sq | Mean Sq | F value | Pr(>F) |
|-----------|----|--------|---------|---------|--------|
| Group     | 1  | 0.60   | 0.60    | 0.04    | 0.8368 |
| Residuals | 18 | 248.05 | 13.78   |         |        |

---

Simultaneous Tests for General Linear Hypotheses

Multiple Comparisons of Means: Dunnett Contrasts

Fit: aov(formula = Bodywt ~ Group, data = subset(Body, Sex == "F" & Day == 1))

Linear Hypotheses:

|            | Estimate | Std. Error | t value | Pr(> t ) |
|------------|----------|------------|---------|----------|
| 2 - 1 == 0 | 0.347    | 1.660      | 0.209   | 0.837    |

(Adjusted p values reported -- single-step method)

Day 2:

---

|           | Df | Sum Sq | Mean Sq | F value | Pr(>F) |
|-----------|----|--------|---------|---------|--------|
| Group     | 1  | 14.79  | 14.79   | 1.04    | 0.3370 |
| Residuals | 8  | 113.39 | 14.17   |         |        |

---

Simultaneous Tests for General Linear Hypotheses

Multiple Comparisons of Means: Dunnett Contrasts

Fit: aov(formula = Bodywt ~ Group, data = subset(Body, Sex == "F" &  
Day == 2))

Linear Hypotheses:

|            | Estimate | Std. Error | t value | Pr(> t ) |
|------------|----------|------------|---------|----------|
| 2 - 1 == 0 | 2.432    | 2.381      | 1.021   | 0.337    |

(Adjusted p values reported -- single-step method)

Day 3:

|           | Df | Sum Sq | Mean Sq | F value | Pr(>F) |
|-----------|----|--------|---------|---------|--------|
| Group     | 1  | 30.70  | 30.70   | 6.24    | 0.0370 |
| Residuals | 8  | 39.33  | 4.92    |         |        |

Simultaneous Tests for General Linear Hypotheses

Multiple Comparisons of Means: Dunnett Contrasts

Fit: aov(formula = Bodywt ~ Group, data = subset(Body, Sex == "F" &  
Day == 3))

Linear Hypotheses:

|            | Estimate | Std. Error | t value | Pr(> t ) |
|------------|----------|------------|---------|----------|
| 2 - 1 == 0 | 3.504    | 1.402      | 2.499   | 0.037 *  |

---

Signif. codes: 0 '\*\*\*' 0.001 '\*\*' 0.01 '\*' 0.05 '.' 0.1 ' ' 1  
(Adjusted p values reported -- single-step method)

Day 8:

|           | Df | Sum Sq | Mean Sq | F value | Pr(>F) |
|-----------|----|--------|---------|---------|--------|
| Group     | 1  | 7.81   | 7.81    | 0.16    | 0.6961 |
| Residuals | 8  | 381.23 | 47.65   |         |        |

Simultaneous Tests for General Linear Hypotheses

Multiple Comparisons of Means: Dunnett Contrasts

Fit: aov(formula = Bodywt ~ Group, data = subset(Body, Sex == "F" &  
Day == 8))

Linear Hypotheses:

|            | Estimate | Std. Error | t value | Pr(> t ) |
|------------|----------|------------|---------|----------|
| 2 - 1 == 0 | 1.768    | 4.366      | 0.405   | 0.696    |

(Adjusted p values reported -- single-step method)

Day 14:

|           | Df | Sum Sq | Mean Sq | F value | Pr(>F) |
|-----------|----|--------|---------|---------|--------|
| Group     | 1  | 2.46   | 2.46    | 0.03    | 0.8680 |
| Residuals | 8  | 668.50 | 83.56   |         |        |

Simultaneous Tests for General Linear Hypotheses

Multiple Comparisons of Means: Dunnett Contrasts

Fit: aov(formula = Bodywt ~ Group, data = subset(Body, Sex == "F" & Day == 14))

Linear Hypotheses:

|            | Estimate | Std. Error | t value | Pr(> t ) |
|------------|----------|------------|---------|----------|
| 2 - 1 == 0 | 0.992    | 5.781      | 0.172   | 0.868    |

(Adjusted p values reported -- single-step method)

Day 15:

|           | Df | Sum Sq | Mean Sq | F value | Pr(>F) |
|-----------|----|--------|---------|---------|--------|
| Group     | 1  | 8.97   | 8.97    | 0.16    | 0.6994 |
| Residuals | 8  | 447.57 | 55.95   |         |        |

Simultaneous Tests for General Linear Hypotheses

Multiple Comparisons of Means: Dunnett Contrasts

Fit: aov(formula = Bodywt ~ Group, data = subset(Body, Sex == "F" & Day == 15))

Linear Hypotheses:

|            | Estimate | Std. Error | t value | Pr(> t ) |
|------------|----------|------------|---------|----------|
| 2 - 1 == 0 | 1.894    | 4.731      | 0.4     | 0.699    |

(Adjusted p values reported -- single-step method)



## Summary

There was significant Sex by Day differences for Females on Day 3 observed in the above results. A significant difference exists between the experimental group (Group 2) and the control group (Group 1) where the Female experimental group weighed significantly more than the Female control group on Day 3. The sole difference finding might better be represented box and whisker plots - presented below.

## Males

**Male Body Weight by Group and Day**

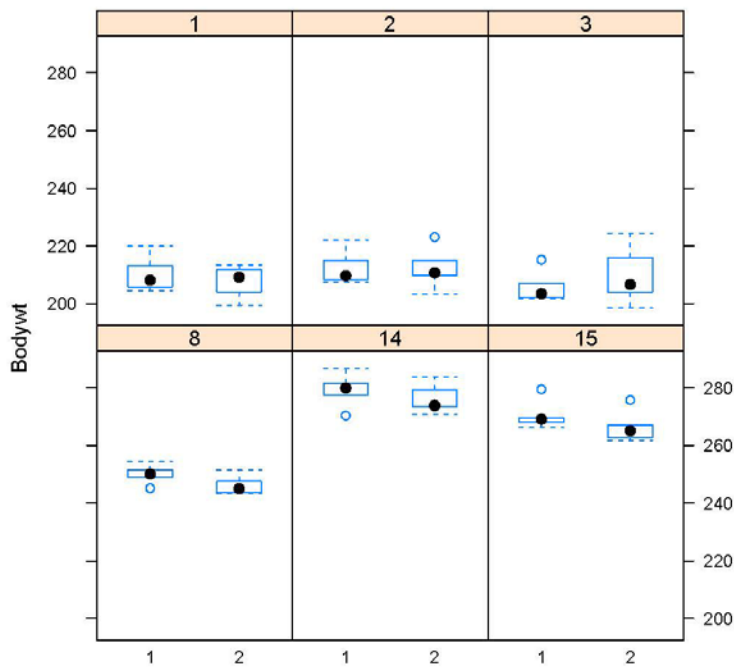

Females

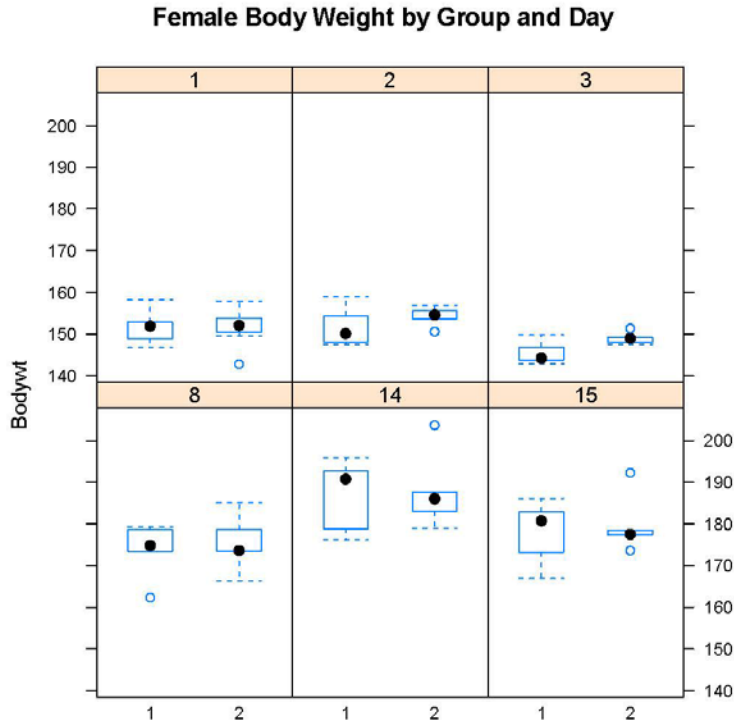

**Organ Weight ANOVA models**

**Brain**

**Male**

|           | Df | Sum Sq | Mean Sq | F value | Pr(>F) |
|-----------|----|--------|---------|---------|--------|
| Group     | 1  | 0.01   | 0.01    | 0.26    | 0.6159 |
| Residuals | 18 | 0.41   | 0.02    |         |        |

Simultaneous Tests for General Linear Hypotheses

Multiple Comparisons of Means: Dunnett Contrasts

Fit: aov(formula = Brain ~ Group, data = subset(Organ, Sex == "M"))

Linear Hypotheses:

|            | Estimate | Std. Error | t value | Pr(> t ) |
|------------|----------|------------|---------|----------|
| 2 - 1 == 0 | 0.03452  | 0.06763    | 0.51    | 0.616    |

(Adjusted p values reported -- single-step method)

#### Female

|           | Df | Sum Sq | Mean Sq | F value | Pr(>F) |
|-----------|----|--------|---------|---------|--------|
| Group     | 1  | 0.00   | 0.00    | 0.18    | 0.6798 |
| Residuals | 18 | 0.16   | 0.01    |         |        |

Simultaneous Tests for General Linear Hypotheses

Multiple Comparisons of Means: Dunnett Contrasts

Fit: aov(formula = Brain ~ Group, data = subset(Organ, Sex == "F"))

Linear Hypotheses:

|            | Estimate | Std. Error | t value | Pr(> t ) |
|------------|----------|------------|---------|----------|
| 2 - 1 == 0 | -0.01763 | 0.04202    | -0.42   | 0.68     |

(Adjusted p values reported -- single-step method)

#### Eyes

##### Males

|           | Df | Sum Sq | Mean Sq | F value | Pr(>F) |
|-----------|----|--------|---------|---------|--------|
| Group     | 1  | 0.00   | 0.00    | 2.03    | 0.1710 |
| Residuals | 18 | 0.03   | 0.00    |         |        |

Simultaneous Tests for General Linear Hypotheses

Multiple Comparisons of Means: Dunnett Contrasts

Fit: aov(formula = Eyes ~ Group, data = subset(Organ, Sex == "M"))

Linear Hypotheses:

|            | Estimate | Std. Error | t value | Pr(> t ) |
|------------|----------|------------|---------|----------|
| 2 - 1 == 0 | 0.02421  | 0.01698    | 1.426   | 0.171    |

(Adjusted p values reported -- single-step method)

### Females

|           | Df | Sum Sq | Mean Sq | F value | Pr(>F) |
|-----------|----|--------|---------|---------|--------|
| Group     | 1  | 0.00   | 0.00    | 0.02    | 0.8829 |
| Residuals | 18 | 0.02   | 0.00    |         |        |

#### Simultaneous Tests for General Linear Hypotheses

Multiple Comparisons of Means: Dunnett Contrasts

Fit: aov(formula = Eyes ~ Group, data = subset(Organ, Sex == "F"))

Linear Hypotheses:

|            | Estimate | Std. Error | t value | Pr(> t ) |
|------------|----------|------------|---------|----------|
| 2 - 1 == 0 | -0.00196 | 0.01312    | -0.149  | 0.883    |

(Adjusted p values reported -- single-step method)

### Heart

#### Male

|           | Df | Sum Sq | Mean Sq | F value | Pr(>F) |
|-----------|----|--------|---------|---------|--------|
| Group     | 1  | 0.05   | 0.05    | 1.83    | 0.1930 |
| Residuals | 18 | 0.50   | 0.03    |         |        |

#### Simultaneous Tests for General Linear Hypotheses

Multiple Comparisons of Means: Dunnett Contrasts

Fit: aov(formula = Heart ~ Group, data = subset(Organ, Sex == "M"))

Linear Hypotheses:

|            | Estimate | Std. Error | t value | Pr(> t ) |
|------------|----------|------------|---------|----------|
| 2 - 1 == 0 | -0.10045 | 0.07427    | -1.352  | 0.193    |

(Adjusted p values reported -- single-step method)

#### Female

|           | Df | Sum Sq | Mean Sq | F value | Pr(>F) |
|-----------|----|--------|---------|---------|--------|
| Group     | 1  | 0.00   | 0.00    | 0.64    | 0.4344 |
| Residuals | 18 | 0.05   | 0.00    |         |        |

#### Simultaneous Tests for General Linear Hypotheses

Multiple Comparisons of Means: Dunnett Contrasts

Fit: aov(formula = Heart ~ Group, data = subset(Organ, Sex == "F"))

Linear Hypotheses:

|            | Estimate | Std. Error | t value | Pr(> t ) |
|------------|----------|------------|---------|----------|
| 2 - 1 == 0 | 0.01879  | 0.02350    | 0.8     | 0.434    |

(Adjusted p values reported -- single-step method)

## Kidneys

### Male

|           | Df | Sum Sq | Mean Sq | F value | Pr(>F) |
|-----------|----|--------|---------|---------|--------|
| Group     | 1  | 0.01   | 0.01    | 0.27    | 0.6095 |
| Residuals | 18 | 0.94   | 0.05    |         |        |

Simultaneous Tests for General Linear Hypotheses

Multiple Comparisons of Means: Dunnett Contrasts

Fit: aov(formula = Kidneys ~ Group, data = subset(Organ, Sex == "M"))

Linear Hypotheses:

|            | Estimate | Std. Error | t value | Pr(> t ) |
|------------|----------|------------|---------|----------|
| 2 - 1 == 0 | 0.05303  | 0.10202    | 0.52    | 0.61     |

(Adjusted p values reported -- single-step method)

### Female

|           | Df | Sum Sq | Mean Sq | F value | Pr(>F) |
|-----------|----|--------|---------|---------|--------|
| Group     | 1  | 0.00   | 0.00    | 0.26    | 0.6155 |
| Residuals | 18 | 0.17   | 0.01    |         |        |

Simultaneous Tests for General Linear Hypotheses

Multiple Comparisons of Means: Dunnett Contrasts

Fit: aov(formula = Kidneys ~ Group, data = subset(Organ, Sex == "F"))

Linear Hypotheses:

|            | Estimate | Std. Error | t value | Pr(> t ) |
|------------|----------|------------|---------|----------|
| 2 - 1 == 0 |          |            |         |          |

2 - 1 == 0 -0.02236 0.04375 -0.511 0.616  
(Adjusted p values reported -- single-step method)

## Liver

### Male

|           | Df | Sum Sq | Mean Sq | F value | Pr(>F) |
|-----------|----|--------|---------|---------|--------|
| Group     | 1  | 0.63   | 0.63    | 0.24    | 0.6318 |
| Residuals | 18 | 47.71  | 2.65    |         |        |

Simultaneous Tests for General Linear Hypotheses

Multiple Comparisons of Means: Dunnett Contrasts

Fit: aov(formula = Liver ~ Group, data = subset(Organ, Sex == "M"))

Linear Hypotheses:

|            | Estimate | Std. Error | t value | Pr(> t ) |
|------------|----------|------------|---------|----------|
| 2 - 1 == 0 | 0.3549   | 0.7281     | 0.487   | 0.632    |

(Adjusted p values reported -- single-step method)

### Female

|           | Df | Sum Sq | Mean Sq | F value | Pr(>F) |
|-----------|----|--------|---------|---------|--------|
| Group     | 1  | 0.73   | 0.73    | 1.66    | 0.2136 |
| Residuals | 18 | 7.88   | 0.44    |         |        |

Simultaneous Tests for General Linear Hypotheses

Multiple Comparisons of Means: Dunnett Contrasts

Fit: aov(formula = Liver ~ Group, data = subset(Organ, Sex == "F"))

Linear Hypotheses:

|            | Estimate | Std. Error | t value | Pr(> t ) |
|------------|----------|------------|---------|----------|
| 2 - 1 == 0 | 0.3816   | 0.2959     | 1.289   | 0.214    |

(Adjusted p values reported -- single-step method)

## Lungs

### Male

|           | Df | Sum Sq | Mean Sq | F value | Pr(>F) |
|-----------|----|--------|---------|---------|--------|
| Group     | 1  | 0.00   | 0.00    | 0.04    | 0.8450 |
| Residuals | 18 | 1.56   | 0.09    |         |        |

Simultaneous Tests for General Linear Hypotheses

Multiple Comparisons of Means: Dunnett Contrasts

Fit: aov(formula = Lungs ~ Group, data = subset(Organ, Sex == "M"))

Linear Hypotheses:

|            | Estimate | Std. Error | t value | Pr(> t ) |
|------------|----------|------------|---------|----------|
| 2 - 1 == 0 | -0.0261  | 0.1316     | -0.198  | 0.845    |

(Adjusted p values reported -- single-step method)

### Female

|           | Df | Sum Sq | Mean Sq | F value | Pr(>F) |
|-----------|----|--------|---------|---------|--------|
| Group     | 1  | 0.05   | 0.05    | 1.29    | 0.2702 |
| Residuals | 18 | 0.63   | 0.04    |         |        |

Simultaneous Tests for General Linear Hypotheses

Multiple Comparisons of Means: Dunnett Contrasts

Fit: aov(formula = Lungs ~ Group, data = subset(Organ, Sex == "F"))

Linear Hypotheses:

|            | Estimate | Std. Error | t value | Pr(> t ) |
|------------|----------|------------|---------|----------|
| 2 - 1 == 0 | 0.09524  | 0.08372    | 1.138   | 0.27     |

(Adjusted p values reported -- single-step method)

## Ovaries (Females Only)

### Female

|           | Df | Sum Sq | Mean Sq | F value | Pr(>F) |
|-----------|----|--------|---------|---------|--------|
| Group     | 1  | 0.00   | 0.00    | 0.17    | 0.6850 |
| Residuals | 16 | 0.01   | 0.00    |         |        |

Simultaneous Tests for General Linear Hypotheses

Multiple Comparisons of Means: Dunnett Contrasts

Fit: aov(formula = OvariesF ~ Group, data = subset(Organ, Sex == "F"))

Linear Hypotheses:

|            | Estimate  | Std. Error | t value | Pr(> t ) |
|------------|-----------|------------|---------|----------|
| 2 - 1 == 0 | -0.004289 | 0.010383   | -0.413  | 0.685    |

(Adjusted p values reported -- single-step method)

## Spleen

Male

|           | Df | Sum Sq | Mean Sq | F value | Pr(>F) |
|-----------|----|--------|---------|---------|--------|
| Group     | 1  | 0.02   | 0.02    | 2.47    | 0.1334 |
| Residuals | 18 | 0.15   | 0.01    |         |        |

Simultaneous Tests for General Linear Hypotheses

Multiple Comparisons of Means: Dunnett Contrasts

Fit: aov(formula = Spleen ~ Group, data = subset(Organ, Sex == "M"))

Linear Hypotheses:

|            | Estimate | Std. Error | t value | Pr(> t ) |
|------------|----------|------------|---------|----------|
| 2 - 1 == 0 | 0.06416  | 0.04081    | 1.572   | 0.133    |

(Adjusted p values reported -- single-step method)

Female

|           | Df | Sum Sq | Mean Sq | F value | Pr(>F) |
|-----------|----|--------|---------|---------|--------|
| Group     | 1  | 0.00   | 0.00    | 0.04    | 0.8428 |
| Residuals | 18 | 0.09   | 0.00    |         |        |

Simultaneous Tests for General Linear Hypotheses

Multiple Comparisons of Means: Dunnett Contrasts

Fit: aov(formula = Spleen ~ Group, data = subset(Organ, Sex == "F"))



Linear Hypotheses:

|            | Estimate | Std. Error | t value | Pr(> t ) |
|------------|----------|------------|---------|----------|
| 2 - 1 == 0 | 0.00624  | 0.03102    | 0.201   | 0.843    |

(Adjusted p values reported -- single-step method)

### Testes (Males Only)

Male

|           | Df | Sum Sq | Mean Sq | F value | Pr(>F) |
|-----------|----|--------|---------|---------|--------|
| Group     | 1  | 0.05   | 0.05    | 0.40    | 0.5351 |
| Residuals | 18 | 2.39   | 0.13    |         |        |

Simultaneous Tests for General Linear Hypotheses

Multiple Comparisons of Means: Dunnett Contrasts

Fit: aov(formula = TestesM ~ Group, data = subset(Organ, Sex == "M"))

Linear Hypotheses:

|            | Estimate | Std. Error | t value | Pr(> t ) |
|------------|----------|------------|---------|----------|
| 2 - 1 == 0 | 0.1031   | 0.1631     | 0.632   | 0.535    |

(Adjusted p values reported -- single-step method)

### Thyroid (with parathyroid)

Male

|           | Df | Sum Sq | Mean Sq | F value | Pr(>F) |
|-----------|----|--------|---------|---------|--------|
| Group     | 1  | 0.00   | 0.00    | 0.96    | 0.3394 |
| Residuals | 18 | 0.00   | 0.00    |         |        |

Simultaneous Tests for General Linear Hypotheses

Multiple Comparisons of Means: Dunnett Contrasts

Fit: aov(formula = Thyroid ~ Group, data = subset(Organ, Sex == "M"))

Linear Hypotheses:

|            | Estimate  | Std. Error | t value | Pr(> t ) |
|------------|-----------|------------|---------|----------|
| 2 - 1 == 0 | -0.006940 | 0.007072   | -0.981  | 0.339    |

(Adjusted p values reported -- single-step method)

Female

|           | Df | Sum Sq | Mean Sq | F value | Pr(>F) |
|-----------|----|--------|---------|---------|--------|
| Group     | 1  | 0.00   | 0.00    | 1.57    | 0.2275 |
| Residuals | 17 | 0.00   | 0.00    |         |        |

Simultaneous Tests for General Linear Hypotheses

Multiple Comparisons of Means: Dunnett Contrasts

Fit: aov(formula = Thyroid ~ Group, data = subset(Organ, Sex == "F"))

Linear Hypotheses:

|            | Estimate | Std. Error | t value | Pr(> t ) |
|------------|----------|------------|---------|----------|
| 2 - 1 == 0 | 0.007668 | 0.006124   | 1.252   | 0.227    |

(Adjusted p values reported -- single-step method)

There were no significant effects observed in the Sex by Organ weight ANOVA models presented above.

## General Summary

The comparisons between the experimental and control group produced one significant result for body weight (Females in the experimental group weighed significantly more than the Females in the control group on Day 3) and none for organ weights. A single significant finding from more than 20 protected tests still falls within the expected error and should not signify a meaningful effect.

---

I submitted this report with source code for the analysis and data files analyzed on November 25th, 2014.

Patrick E. McKnight, Ph.D.  
McKnight Consulting, LLC



Supplement: MOESM2 [file 41467_2019_11863_MOESM2_ESM.pdf › 41467_2019_11863_MOESM2_ESM.pdf]
