# Supplementary material for: Evaluation of integrin αvβ6 cystine knot PET tracers to detect cancer and idiopathic pulmonary fibrosis
Source: Springer Nature journal article supplement (doi:10.1038/s41467-019-11863-w), 2019-10-14
Supplement: MOESM1 [file 41467_2019_11863_MOESM1_ESM.pdf › 41467_2019_11863_MOESM1_ESM.pdf]

## Supplementary Information

Evaluation of Integrin  $\alpha v \beta 6$  Cystine Knot PET Tracers to Detect Cancer and Idiopathic Pulmonary Fibrosis

Kimura *et. al.*

## Development of the Lead Candidate R<sub>0</sub>1-MG.

Recently, a cystine knot peptide, R<sub>0</sub>1, engineered to selectively bind human integrin  $\alpha_v\beta_6$  ( $K_D \sim 3\text{nM}$ ), was validated in mouse models by our lab as [<sup>64</sup>Cu]DOTA-R<sub>0</sub>1 and [<sup>18</sup>F]FB-R<sub>0</sub>1 PET tracers (Kimura et al., Clin. Can. Res., 2012, and Hackel et al., J. Nucl. Med, 2013). However, during storage and routine handling of the knottin precursor, R<sub>0</sub>1, oxidation would occur at a methionine residue, forming methionine sulfoxide, in the active loop-1 (CILNMRTDLGTLFR, Figure 1A, Supplementary Figure 1); a gain in mass of ~16Da as observed by matrix-assisted laser desorption/ionization time-of-flight mass spectrometry (MALDI-TOF-MS). Tandem MS/MS studies indicated the presence of an extra oxygen atom (data not shown). We therefore employed a site-directed evolution strategy that allowed any of the 20 amino acids to occur at this methionine's position in the loop. These studies yielded three highly-represented clones containing either an arginine (R<sub>0</sub>1-MR), a glycine (R<sub>0</sub>1-MG, Figure 1A) or a tryptophan residue (R<sub>0</sub>1-MW) at that position (Supplementary Figure 1). We hypothesized that non-methionine residues may be better able to resist spontaneous chemical modification resulting from insults such as physical handling, extended storage, multiple freeze thaw cycles in an oxidative environment, or exposure to various chemical environments during coupling reactions.

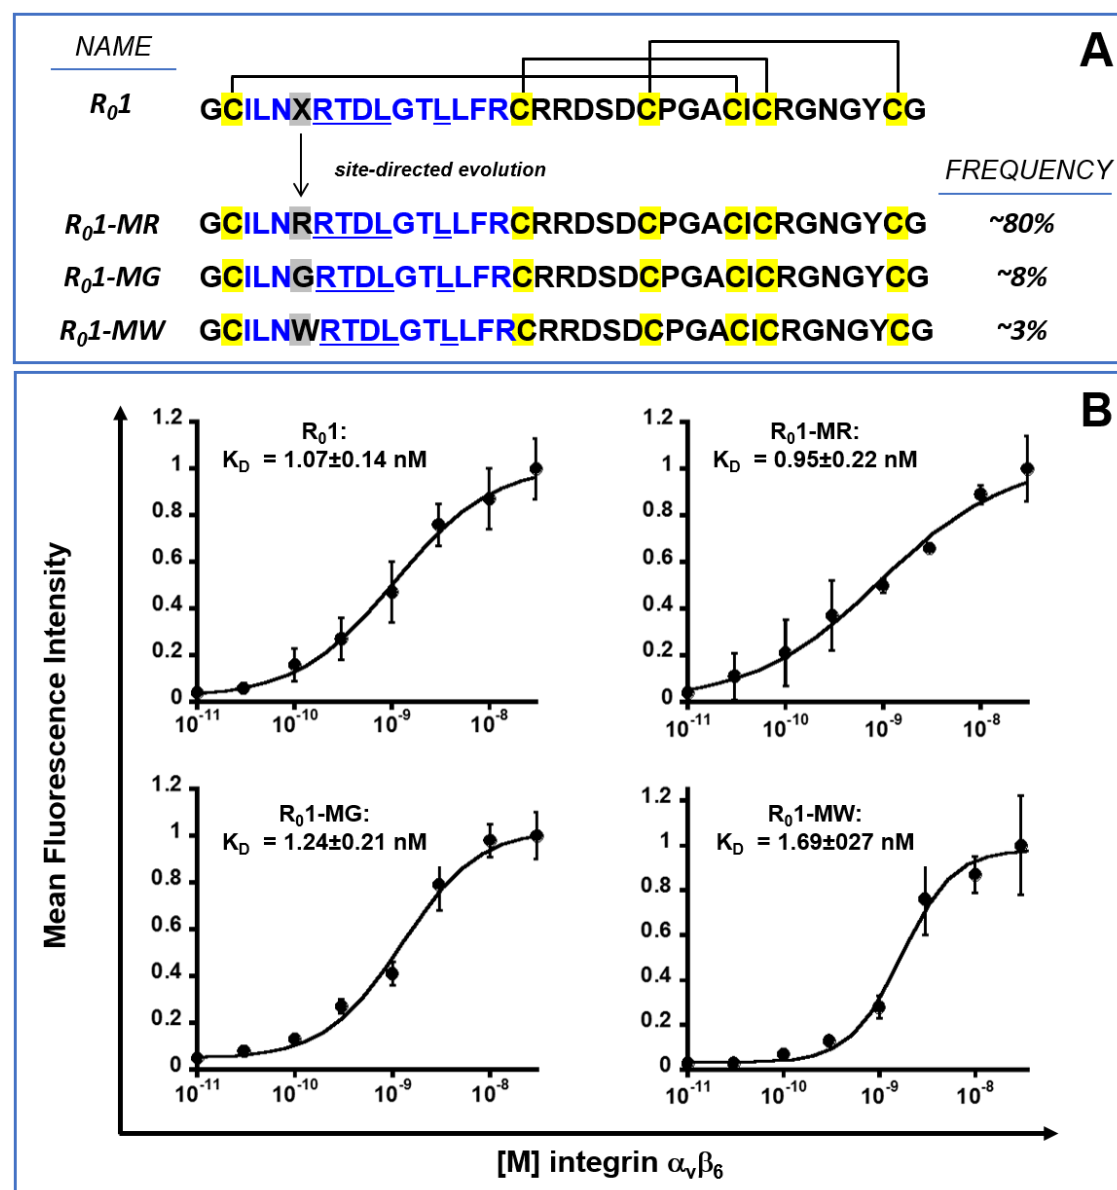

**Supplementary Figure 1. Site-Directed Evolution and Determination of Binding Affinity.** (A) Site-Directed evolution of R<sub>0</sub>1. The position of methionine in loop-1 was randomized to any amino acid. The set of 20 mutants competed for molecular recognition of integrin  $\alpha_v\beta_6$ . The R<sub>0</sub>1-MR variant was present in ~80% of the selected clones. R<sub>0</sub>1-MG and R<sub>0</sub>1-MW represented ~8, and ~3% of pool, respectively. The original methionine-containing variant was not present. (B) Equilibrium dissociation constants of the selected variants, R<sub>0</sub>1, R<sub>0</sub>1-MR, R<sub>0</sub>1-MG and R<sub>0</sub>1-MW are shown in the respective charts. Three replicates were obtained on three separate days to generate an average. Source data are provided in a Source Data File.

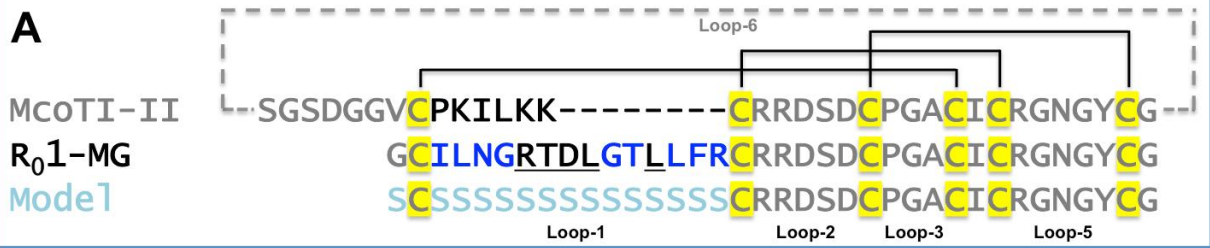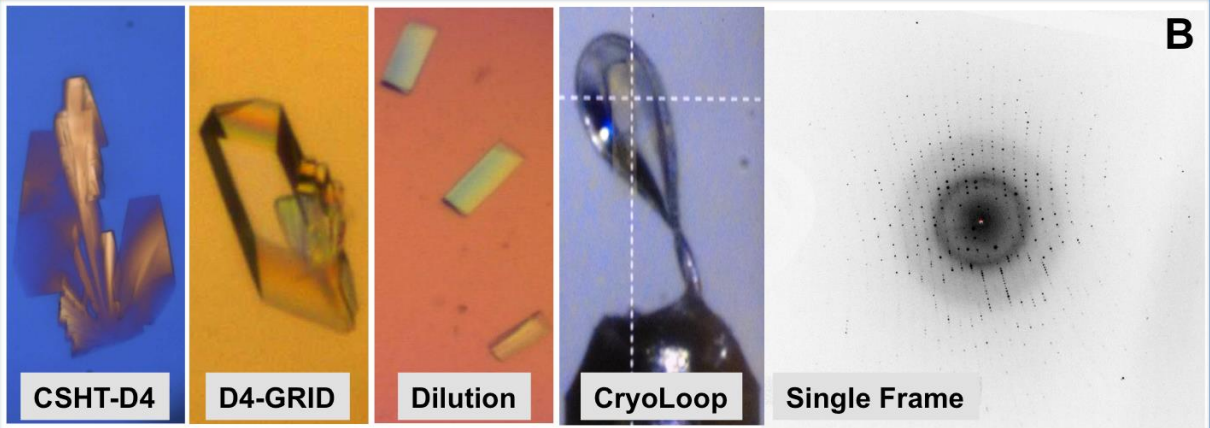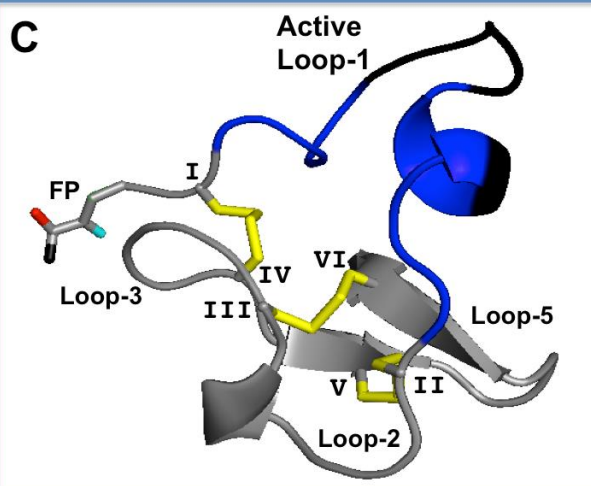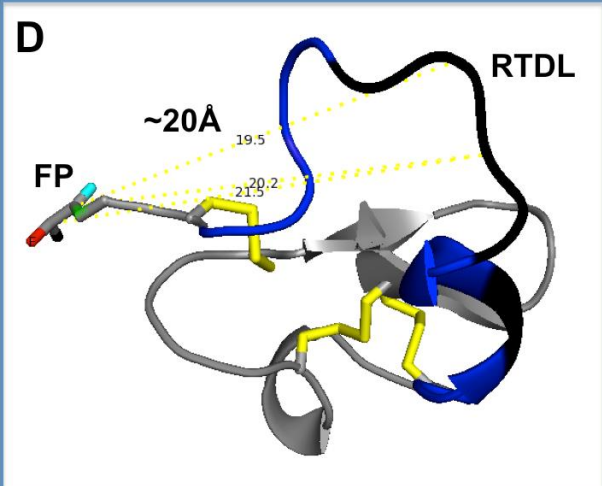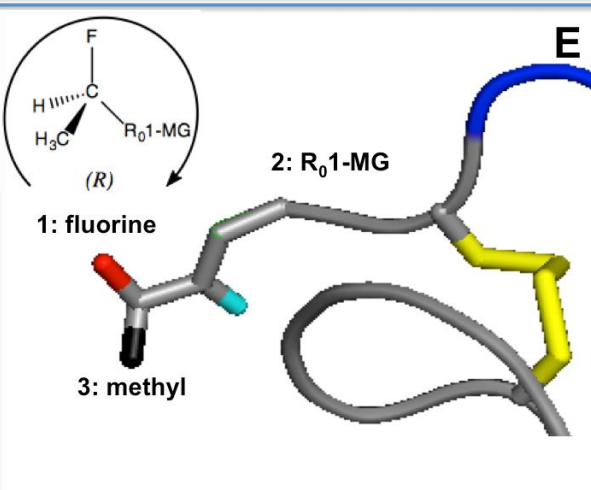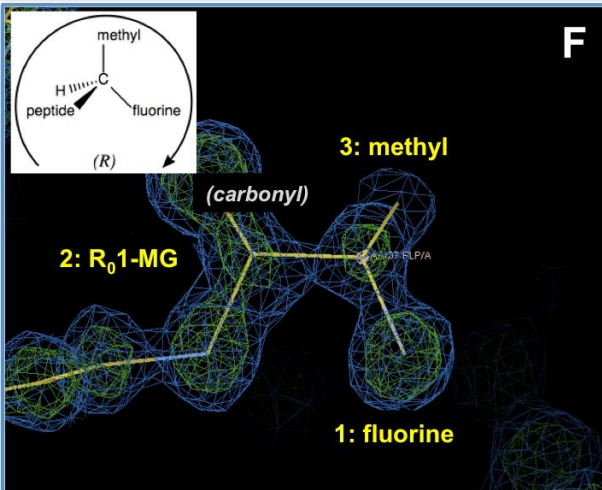

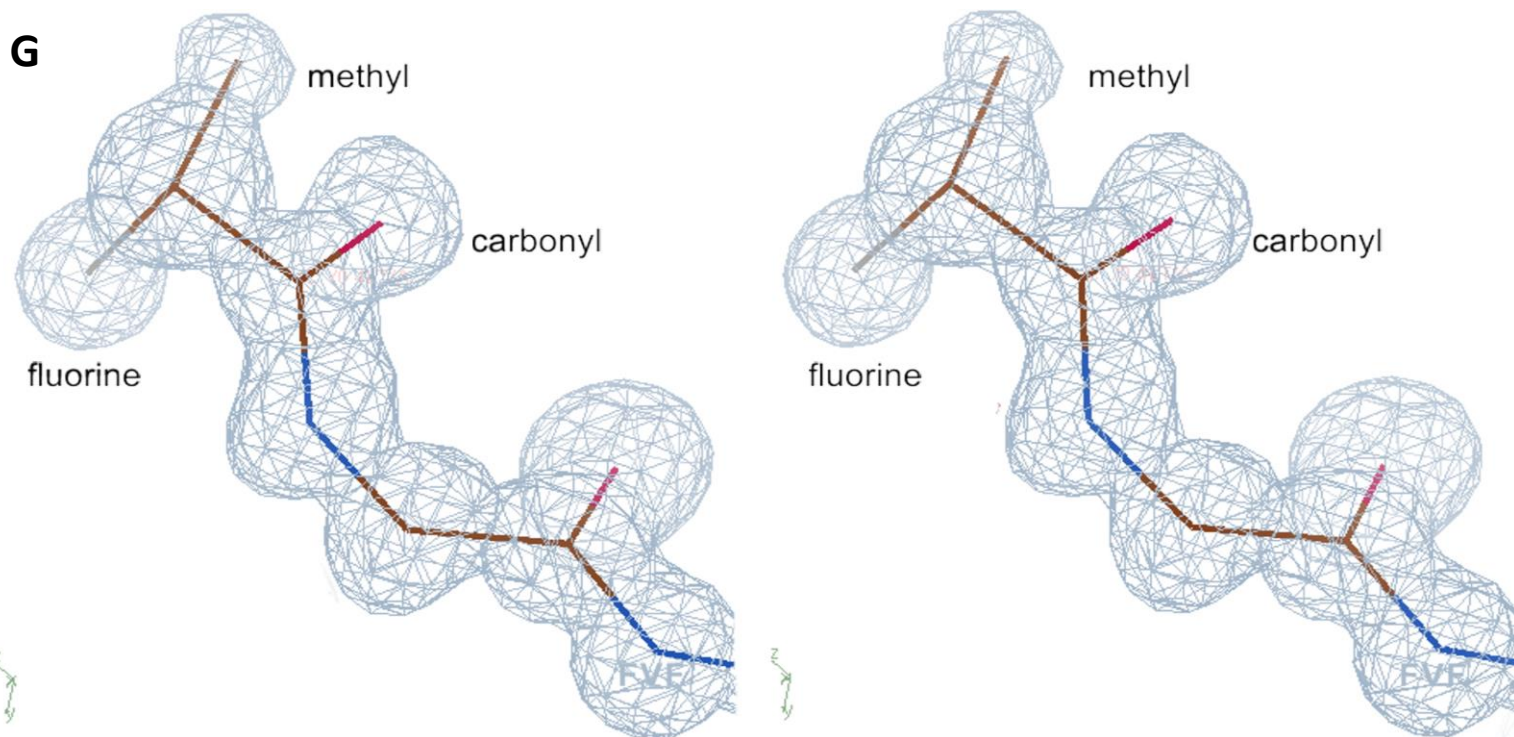

**Supplementary Figure 2. Structural Determination of Reference Standard  $[^{19}\text{F}]\text{FP-R}_0\text{1-MG-F2}$ .** (A) The primary structure of *Momordica Cochinchinensis* Trypsin Inhibitor-II (MCoTI-II, grey), the parent cyclic cysteine knot (cyclotide) scaffold derived from the southeast asian fruit “gac”, and the linear drug compound precursor peptide  $\text{R}_0\text{1-MG}$  (black). “Model” (cyan) represents the initial structure used in molecular replacement studies. The dotted line represents backbone cyclization by an additional loop-6 in MCoTI-II (B) Crystal growth and x-ray data collection. Crystals of  $[^{19}\text{F}]\text{FP-R}_0\text{1-MG-F2}$  grown in CSHT-D4 and D4-GRID (Hampton Research (HR), Aliso Viejo California). “Dilution” shows three discrete high quality crystals grown slowly in D4-GRID using a lower initial concentration of  $[^{19}\text{F}]\text{FP-R}_0\text{1-MG-F2}$ . A  $\sim 50\mu\text{m}$  crystal loaded on a CryoLoop MicroTube pin (HR). Single frame shows Beamline 4.2.2 (Advanced Lightsource, Lawrence Berkeley National Laboratory, Berkeley, CA) image of  $[^{19}\text{F}]\text{FP-R}_0\text{1-MG-F2}$  taken in 0.1 sec, with  $0.1^\circ$  angular rotation of crystal. (C-E) Three dimensional structure of the reference standard  $[^{19}\text{F}]\text{FP-R}_0\text{1-MG-F2}$ . Roman numerals I-VI represent the positions of six cysteine residues and three disulfide bonds (yellow). The active loop-1 is shown in blue, highlighting the RTDLXXL integrin  $\alpha_v\beta_6$  recognition motif in black. The red portion of the fluoropropyl (FP) group represents the fluorine atom, the black represents the methyl group, and the cyan represents the carbonyl oxygen of the amide bond connecting the peptide. (D) Distance measurement between the FP group and the RTDLXXL motif indicates approximately  $20\text{ \AA}$  separation. (E-F) Stereochemical analysis of the chiral center indicates the R enantiomer. (E) Electron density maps. The blue shell and the green shell represent the  $\text{F}_0\text{-F}_c$  and  $2\text{F}_0\text{-F}_c$  maps, respectively. (G) Stereo electron density map of the N-terminus fluoropropyl group.



## Synthesis of the FP-labeled PET Tracer and Standard

During the chemical development of [ $^{18}\text{F}$ ]FP-R<sub>0</sub>1-MG, two closely related forms of the tracer (and the reference standard [ $^{19}\text{F}$ ]FP-R<sub>0</sub>1-MG) emerged in equal amounts. Interestingly, the isomers had the identical mass and activity relative to the other, even though the two fractions (F1 and F2) were separable by  $\sim 1$  min by RP-HPLC (Supplementary Figure 1 and Supplementary Figure 3A). Competition binding assays among the two fractions and the unlabeled peptide indicated that the imaging label did not adversely affect binding affinity for integrin  $\alpha_v\beta_6$  (Supplementary Figure 3C). Further evaluation in pre-clinical models demonstrated indistinguishable biological behavior between the two fractions (data not shown). Unfortunately, the first fraction coeluted with a radiochemical impurity, so we were not able to simply translate the mixture. Instead, fraction 2 ([ $^{18}\text{F}$ ]FP-R<sub>0</sub>1-MG-F2) was purified to >95% and advanced as the lead candidate for further evaluation.

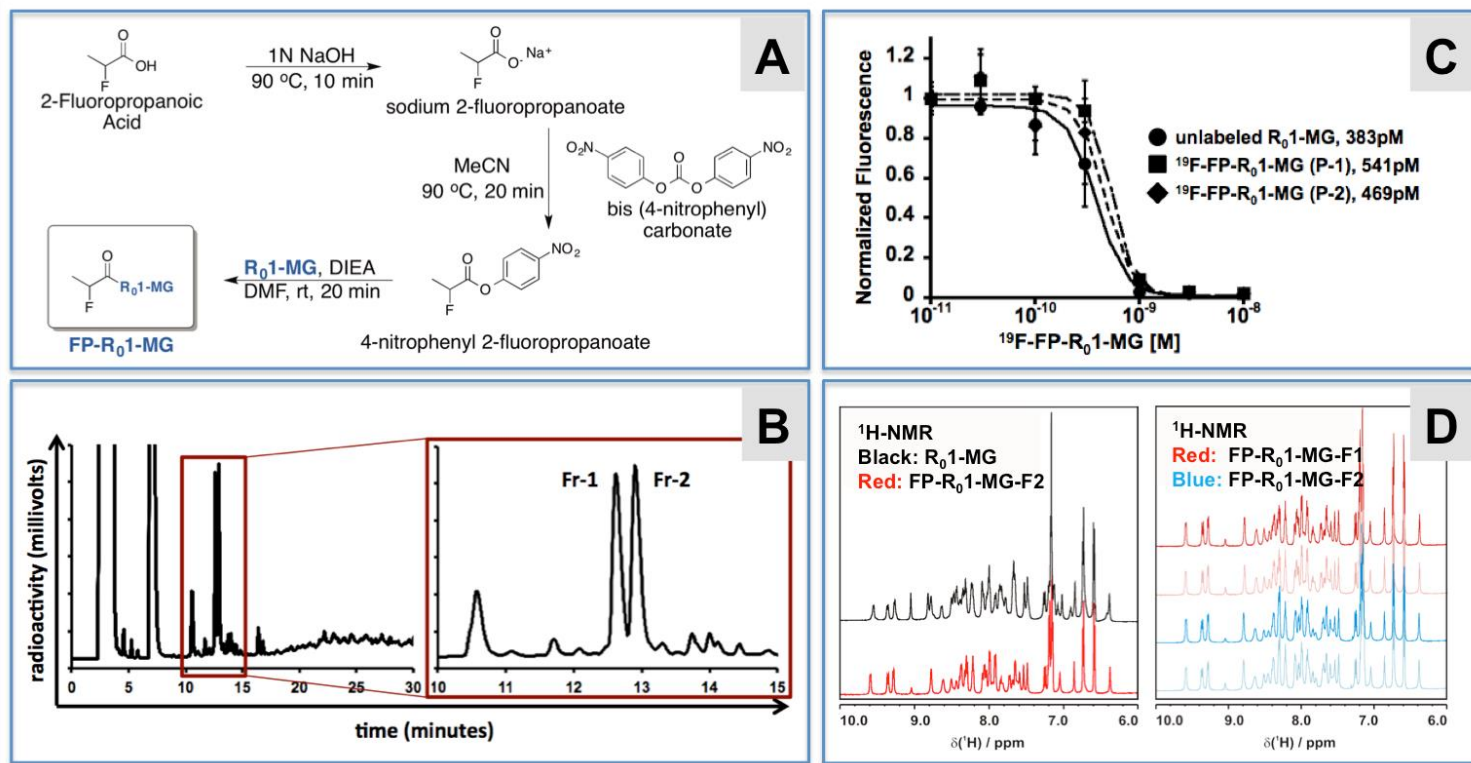

**Supplementary Figure 3. Chemical Synthesis and Characterization.** (A) Synthesis scheme for the non-radioactive reference standard [ $^{19}\text{F}$ ]FP-R<sub>0</sub>1-MG. Nonradioactive fluoropropanoate salt (Sigma-Aldrich Corp., St. Louis, MO), was reacted with bis (4-nitrophenyl) carbonate (Sigma-Aldrich) to yield the active nitrophenyl propanoate ester [NPE], which was subsequently reacted with R<sub>0</sub>1-MG to produce [ $^{19}\text{F}$ ]FP-R<sub>0</sub>1-MG. (B) RP-HPLC. Fractions 1 and 2 are separated by  $\sim 1$  minute. (C) Competition Binding ( $\text{IC}_{50}$ ). Unlabeled R<sub>0</sub>1-MG and both fractions [ $^{19}\text{F}$ ]FP-R<sub>0</sub>1-MG-F1 and [ $^{19}\text{F}$ ]FP-R<sub>0</sub>1-MG-F2 recognize integrin  $\alpha_v\beta_6$  with subnanomolar binding affinity as they effectively compete with R<sub>0</sub>1-MG displayed on the surface of yeast. (D)  $^1\text{H}$ -NMR studies of the precursor peptide R<sub>0</sub>1-MG compared to [ $^{19}\text{F}$ ]FP-R<sub>0</sub>1-MG-F2 (left panel).  $^1\text{H}$ -NMR of the two fractions, [ $^{19}\text{F}$ ]FP-R<sub>0</sub>1-MG-F1 and [ $^{19}\text{F}$ ]FP-R<sub>0</sub>1-MG-F2 show identical chemical shifts (right panel). Source data are provided in a Source Data File.

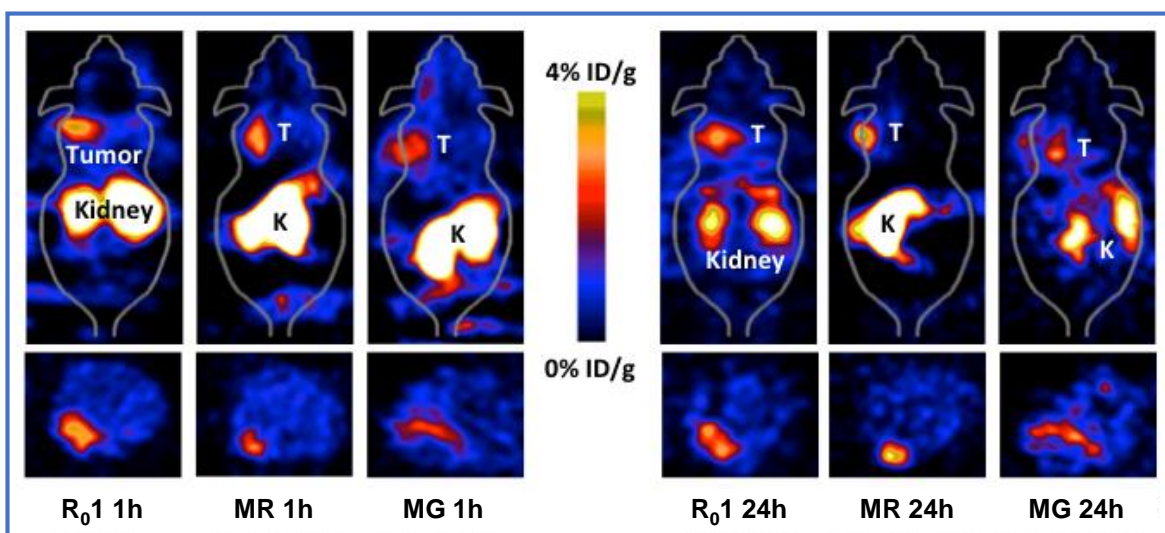

**Supplementary Figure 4. PET Imaging.** (A) [ $^{64}\text{Cu}$ ]DOTA-R<sub>0</sub>1, [ $^{64}\text{Cu}$ ]DOTA-R<sub>0</sub>1-MR, [ $^{64}\text{Cu}$ ]DOTA-R<sub>0</sub>1-MG were evaluated in BxPC3 xenograft mouse models. PET images were acquired 1 hour and 24 hour post injection. Tumor (T), and kidney (K) are identified in the image shown.

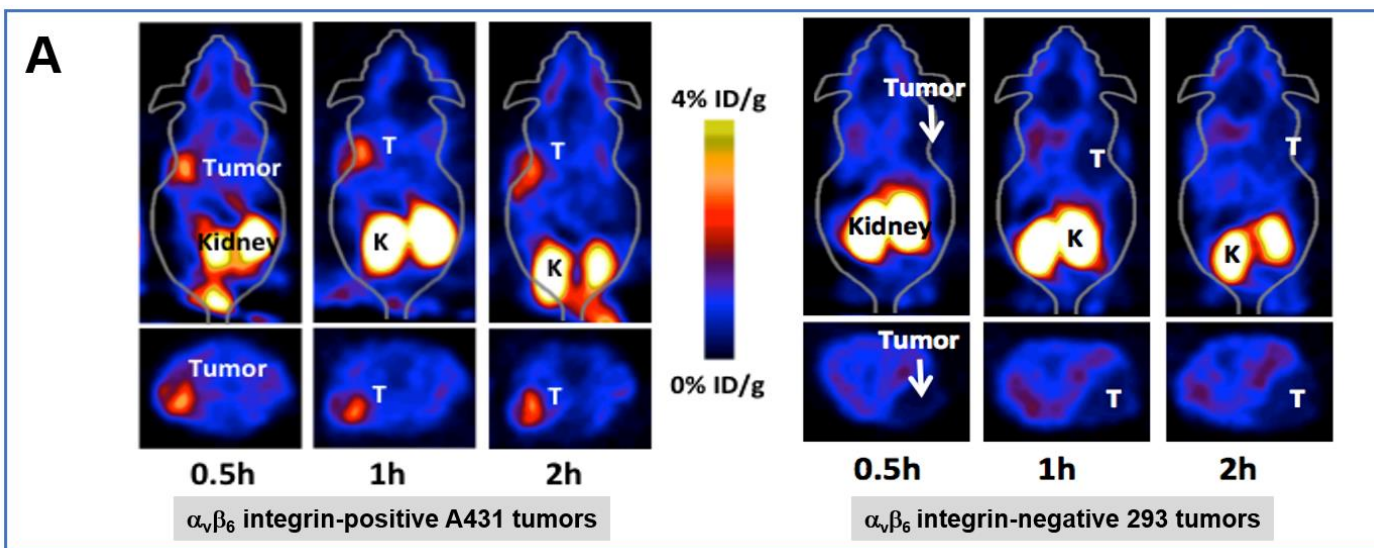

**Supplementary Figure 5.  $[^{18}\text{F}]$ FP-R<sub>0</sub>1-MG-F2 Static PET Imaging.** (A) Representative PET images of *nu/nu* mice bearing integrin  $\alpha_v\beta_6$ -positive A431 xenografts (left) and integrin  $\alpha_v\beta_6$ -negative 293 xenograft (right) models following injection of  $\sim 100\mu\text{Ci}$   $[^{18}\text{F}]$ FP-R<sub>0</sub>1-MG-F2. Location of tumor and kidneys are indicated by the letters T and K.

### **[<sup>18</sup>F]FP-R<sub>0</sub>1-MG-F2 Dynamic PET Imaging**

Dynamic PET/CT imaging indicated that uptake of [<sup>18</sup>F]FP-R<sub>0</sub>1-MG-F2 in integrin  $\alpha_v\beta_6$  expressing tumors was rapid and high. At 5 minutes p.i., average tumor uptake reached  $5.4 \pm 2.7$  %ID/g, and plateaued at  $5.7 \pm 2.8$  %ID/g at 60 minutes p.i.. Immediately upon tail vein injection, the PET tracer quickly entered and cleared both the heart and the liver (6C). A region-of-interest (ROI) drawn around the heart indicated that the maximum flow-through of the PET tracer through the heart occurred approximately 0.5 minutes p.i, and quickly decreased by 50% within 1.5 minutes p.i. At 60 minutes p.i., the heart and liver values continued to decrease to  $\sim 1.4$  %ID/g, and  $\sim 1.2$  %ID/g, respectively, indicating rapid clearance of the PET tracer from the blood compartment and from normal tissues as shown in 6C. [<sup>18</sup>F]FP-R<sub>0</sub>1-MG-F2 cleared primarily via the kidneys where maximum uptake values of  $\sim 54$  %ID/g were recorded at 4.5 minutes p.i.. Kidney uptake steadily decreased for the duration of the dynamic scan to  $\sim 16$  %ID/g at 60 min p.i., while the radiotracer accumulated in the bladder to  $\sim 110$  %ID/g. Tumor-to-muscle ratio was approximately 8:1 and 5:1 at 30 and 60 minutes p.i, respectively. The tumor-to-heart ratio was similarly  $\sim 7$ :1 at 30 and 60 minutes p.i. [<sup>18</sup>F]FP-R<sub>0</sub>1-MG-F2 did not accumulate to a great extent in liver, which gave rise to contrast ratios of  $\sim 7$ :1 to  $\sim 10$ :1 at time points beyond 30 minutes.

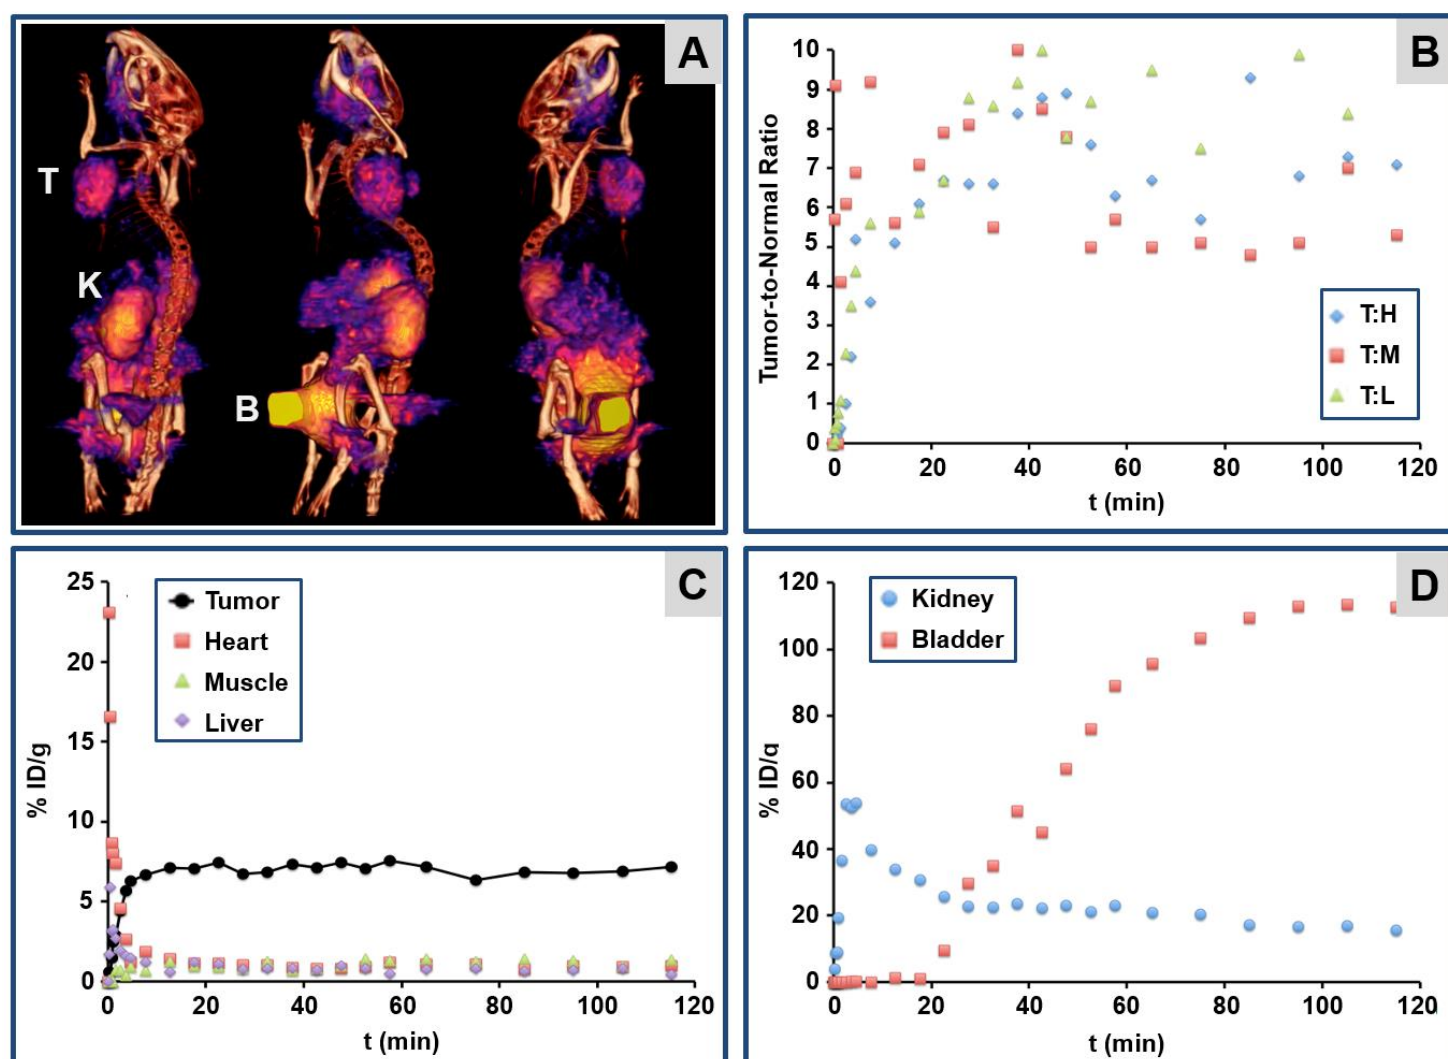

**Supplementary Figure 6. Dynamic PET and PET/CT Imaging.** Nu/Nu female ( $n=3$ ) mice were anesthetized using 2% isoflurane in oxygen and approximately 100  $\mu$ Ci of the [<sup>18</sup>F]FP-R<sub>0</sub>1-MG-F2 was administered via tail-vein. (A) Volume rendered PET images of a representative animal model viewed from 3 different angles. The tumor, kidney and bladder are denoted by T, K and B. Dynamic PET scans were acquired for up to 2 hours post-injection in a small animal PET/CT scanner (1.4-mm resolution, Inveon; Siemens, Malvern, Pa). resulting in the (B) Tumor-to-normal tissue ratios for heart (H), muscle (M) and liver (L). (C) Time activity curves of tumor and normal heart, muscle and liver tissues over a 2 hour dynamic PET scan indicate rapid tumor uptake and (D) renal excretion routes. Source data are provided in a Source Data File.



## cGMP Radiosynthesis of PET Tracer and Toxicology Studies

In order to produce the reference standard and the PET tracer, the knottin precursor's sole amine, located at its N-terminus, was used to couple either a [ $^{19}\text{F}$ ]FP group or the radioactive analog, [ $^{18}\text{F}$ ]FP, through the electrophilic carbonyl carbon of the active nitrophenyl ester (Supplementary Figure 7A and 7B). Three cGMP-compliant technical validations runs were performed on three separate days to establish and validate the radiosynthesis protocol for production of clinical-grade [ $^{18}\text{F}$ ]FP-R<sub>0</sub>1-MG-F2 (Supplementary Figure 7C). Radiochemical purity of [ $^{18}\text{F}$ ]FP-R<sub>0</sub>1-MG-F2 ranged from 96.1% to 98.3%, and the chemical purity of the probe, for each synthesis, was greater than 99%. In addition, the probe remained stable in injection buffer for two radio half-lives after completion of the radiosynthesis (Supplementary Figure 7D). As shown by radio-HPLC, minor defluorination of the PET Tracer was observed from 2 hr incubation in human serum, and in mouse urine samples collected 2 hr p.i. (Supplementary Figure 7D).

The specific activity of [ $^{18}\text{F}$ ]FP-R<sub>0</sub>1-MG-F2 was used to calculate the mass of tracer that would be administered to human from a PET study involving a dose of 15mCi (Supplementary Figure 7). For toxicological evaluation, the reference standard [ $^{19}\text{F}$ ]FP-R<sub>0</sub>1-MG-F2 was administered to 20 male and 20 female 7-week-old Sprague-Dawley rats at 250 times the anticipated clinical dose. Toxicity was evaluated on days three and fifteen following intravenous injection of the reference standard. All rats survived to the scheduled termination date and remained bright, alert and responsive during the course of the study. No treatment-related differences were found in mean body weights, organ weights, clinical pathology, gross pathology, microscopic pathology or in the biochemical composition of blood (Sobran Inc, Baltimore MD). Under the conditions of this study, there were no treatment related findings in Sprague Dawley rats three or fifteen days after a single 1.1mg/kg intravenous dose of [ $^{19}\text{F}$ ]FP-R<sub>0</sub>1-MG-F2.

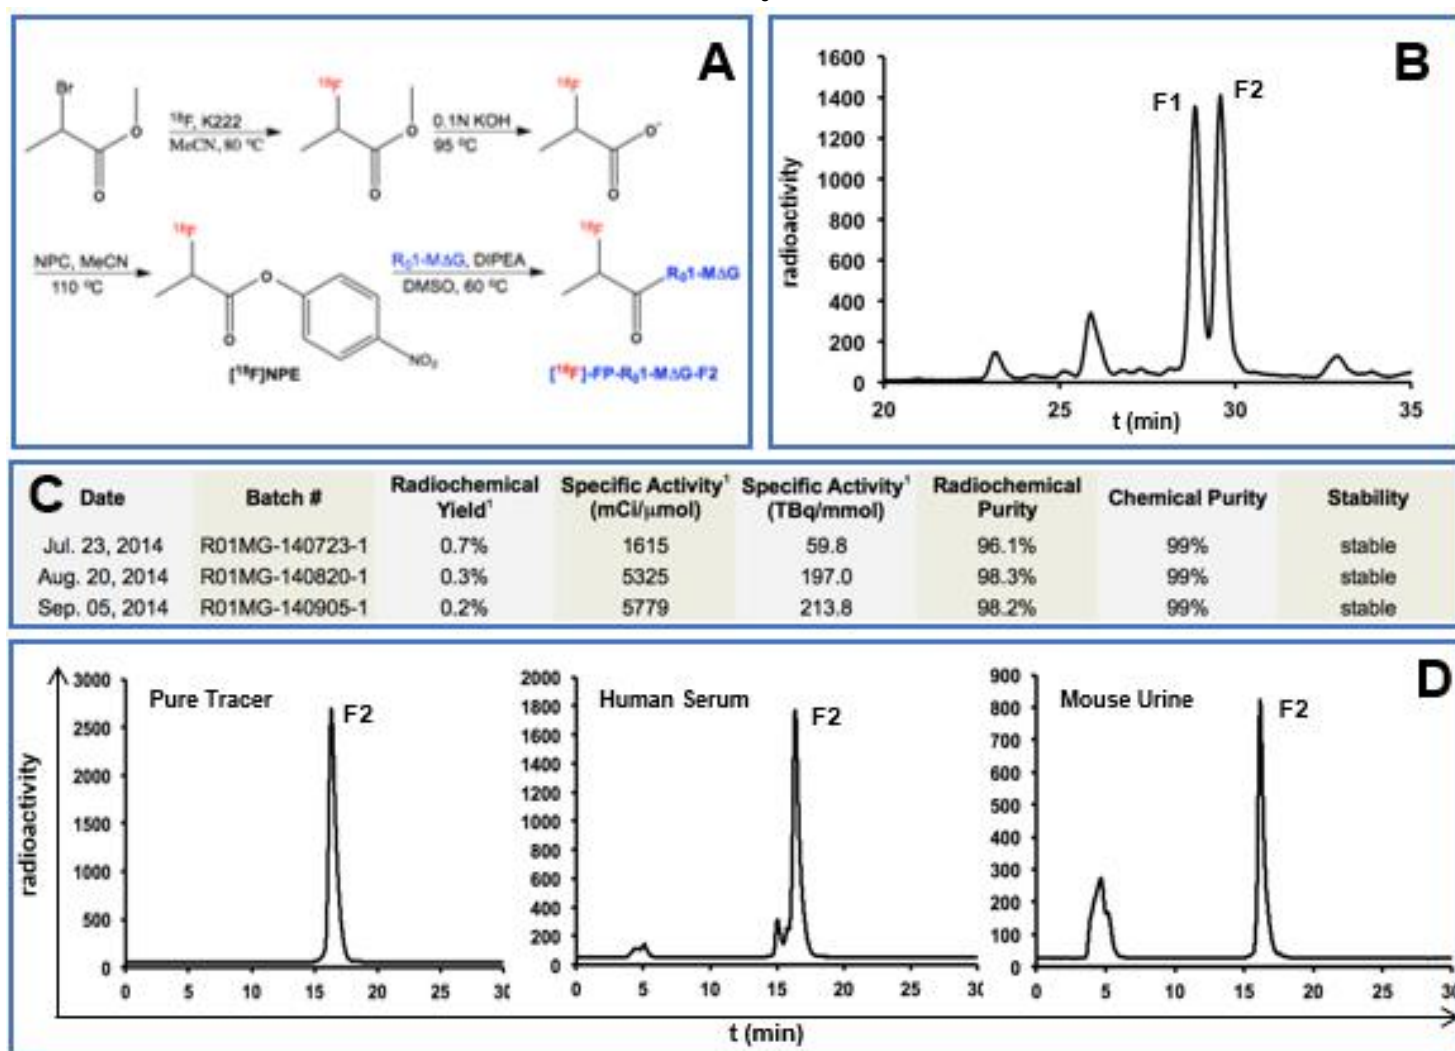

**Supplementary Figure 7. Radiosynthesis and Validation of [ $^{18}\text{F}$ ]FP-R<sub>0</sub>1-MG-F2.** (A) Radiosynthetic reaction scheme. The [ $^{18}\text{F}$ ]fluoropropanoate radiosynthon, was used to produce the reactive [ $^{18}\text{F}$ ] Nitrophenylester (NFE) which was coupled to knottin R<sub>0</sub>1-MG to produce (B) Two products emerged [ $^{18}\text{F}$ ]FP-R<sub>0</sub>1-MG-F1 and F2. [ $^{18}\text{F}$ ]FP-R<sub>0</sub>1-MG-F2 was purified by RP-HPLC to >95% purity. (C) Summary of three technical validation runs. (D) RP-radioHPLC of the purified PET tracer [ $^{18}\text{F}$ ]FP-R<sub>0</sub>1-MG-F2, and stability assay of tracer after incubation in human serum (37°C, 2h) and mouse urine at 2 hours post injection.

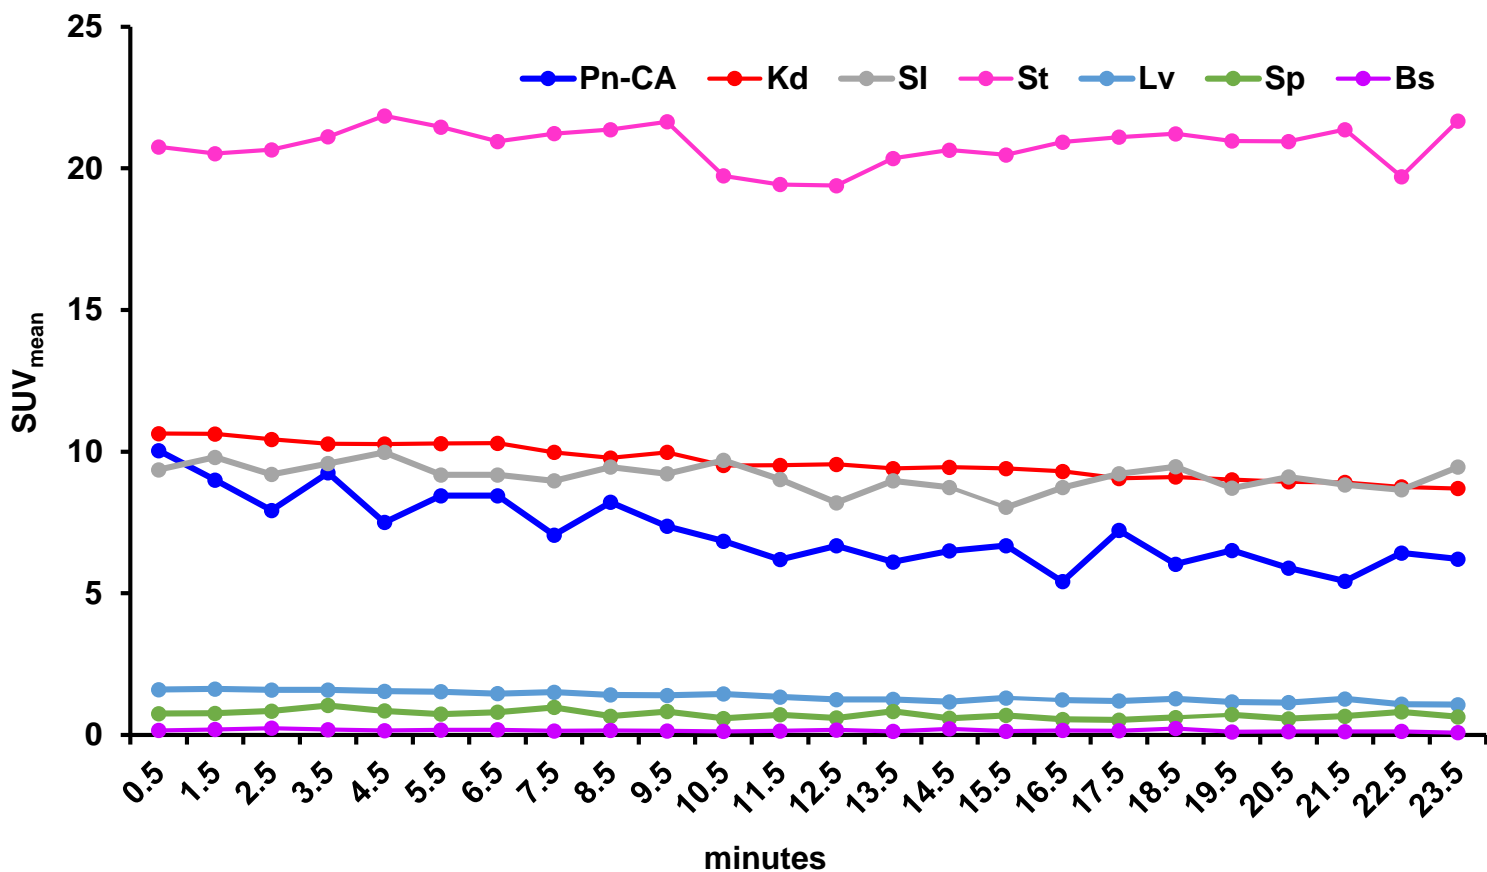

**Supplementary Figure 8. Dynamic PET Study of a Pancreatic Cancer Patient (Stanford).** ROI analysis of the organs that were scanned in a dynamic PET study of the abdomen are given as mean SUV values for 0.5 to 23.5 minutes after injection of [ $^{18}\text{F}$ ]FP-R<sub>0</sub>1-MG-F2. Pn-CA refers to the tumor in the pancreas. Kidney, small intestine, stomach, liver, spleen and breast tissue are indicated as Kd, SI, St, Lv, Sp and Bs, respectively. Source data are provided in a Source Data File.

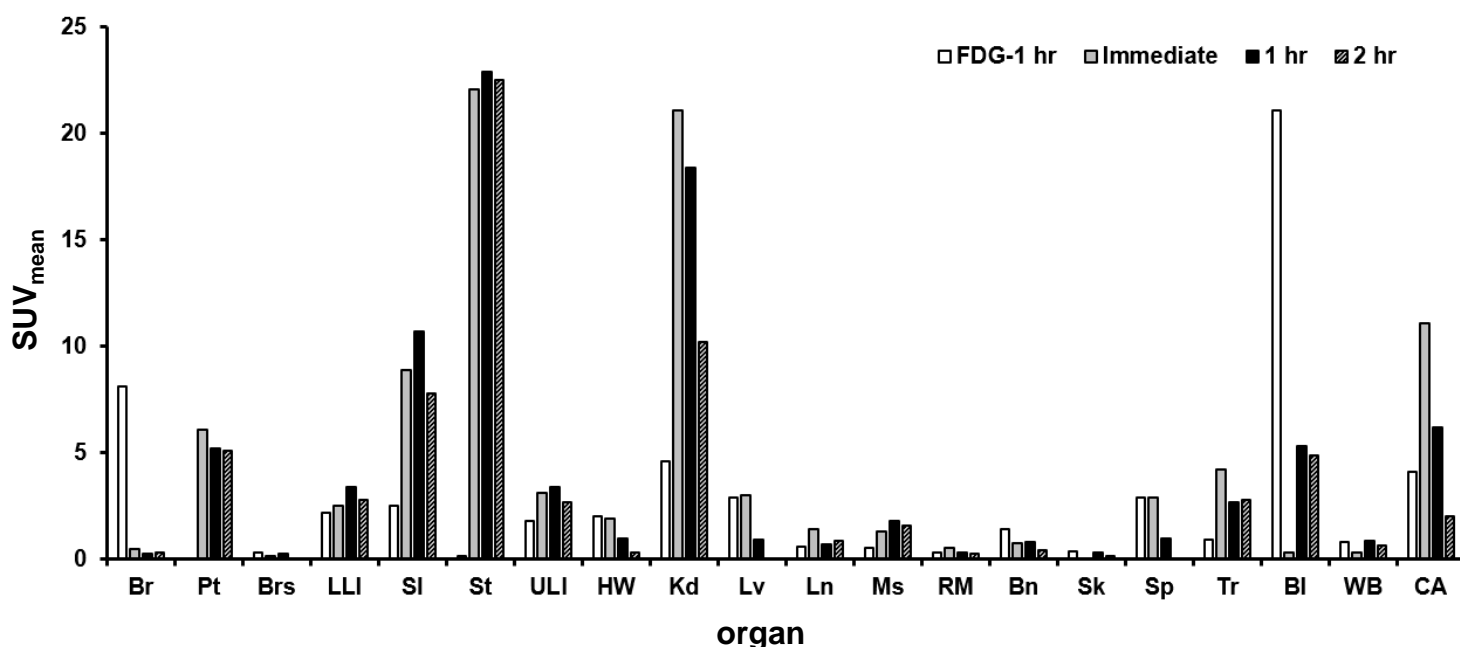

**Supplementary Figure 9. Comparative Imaging of a Pancreatic Cancer Patient (Stanford).** Comparison of  $[^{18}\text{F}]\text{FDG}$  PET (white bar) and  $[^{18}\text{F}]\text{FP-R}_01\text{-MG-F2}$  (black bar) uptake in normal and pancreatic cancer tissue at 1 hour after injection of tracer. The light and gray bars show uptake of  $[^{18}\text{F}]\text{FP-R}_01\text{-MG-F2}$  immediately after injection and at 2 hours after injection. The following organs are shown: brain (Br), pituitary gland (Pt), breast (Brs), lower large intestine (LLI), small intestine (SI), stomach (St), upper large intestine (ULI), heart wall (HW), kidney (Kd), liver (Lv), lung (Ln), muscle (Ms), red marrow (RM), osteogenic cells (Bn), skin (Sk), spleen (Sp), thyroid (Tr), bladder (BI), whole body (WB) and pancreatic cancer (CA). Bladder was voided before each  $[^{18}\text{F}]\text{FP-R}_01\text{-MG-F2}$  PET scan. Bladder was not voided prior to the  $[^{18}\text{F}]\text{FDG}$  PET scan. Source data are provided in a Source Data File.

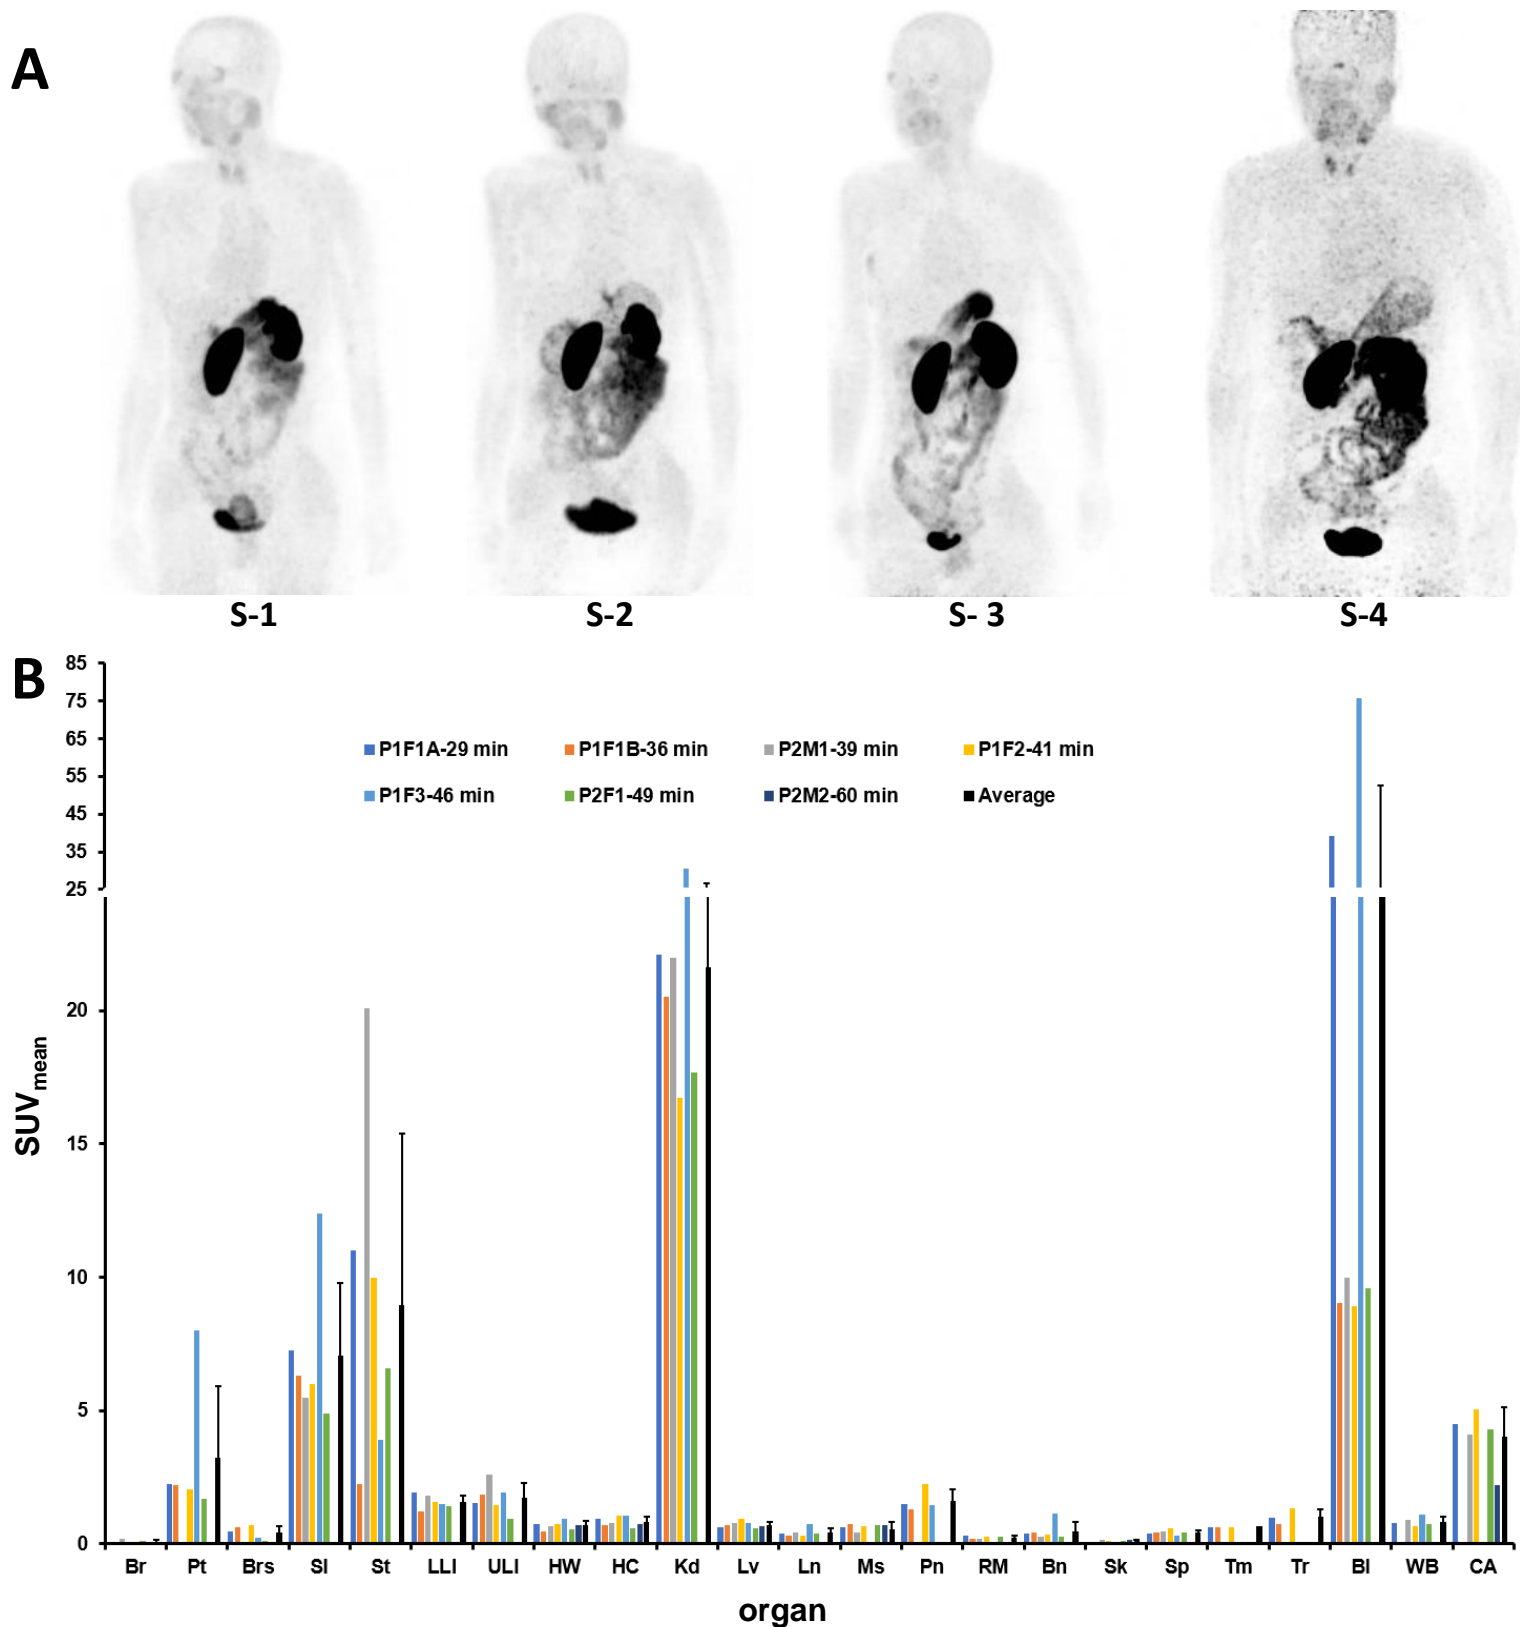

**Supplementary Figure 10.  $[^{68}\text{Ga}]\text{NODA-GA-R}_0\text{1-MG}$  PET Study of Patients Imaged at Peking Union Medical College Hospital, China.** (A)  $[^{68}\text{Ga}]\text{NODAGA-R}_0\text{1-MG}$  MIP PET images of female study subjects (47 to 69 years-old) acquired ~ 30 to 60 minutes post injection. (B) Static PET scans of 6 cancer patients imaged between 29-60 minutes after injection of tracer. The following organs are shown: brain (Br), pituitary gland (Pt), breast (Brs), lower large intestine (LLI), small intestine (SI), stomach (St), upper large intestine (ULI), heart wall (HW), heart contents (HC), kidney (Kd), liver (Lv), lung (Ln), muscle (Ms), red marrow (RM), osteogenic cells (Bn), skin (Sk), spleen (Sp), thymus (Tm), thyroid (Tr), bladder (BI), whole body (WB) and cancer (CA). Source data are provided in a Source Data File.

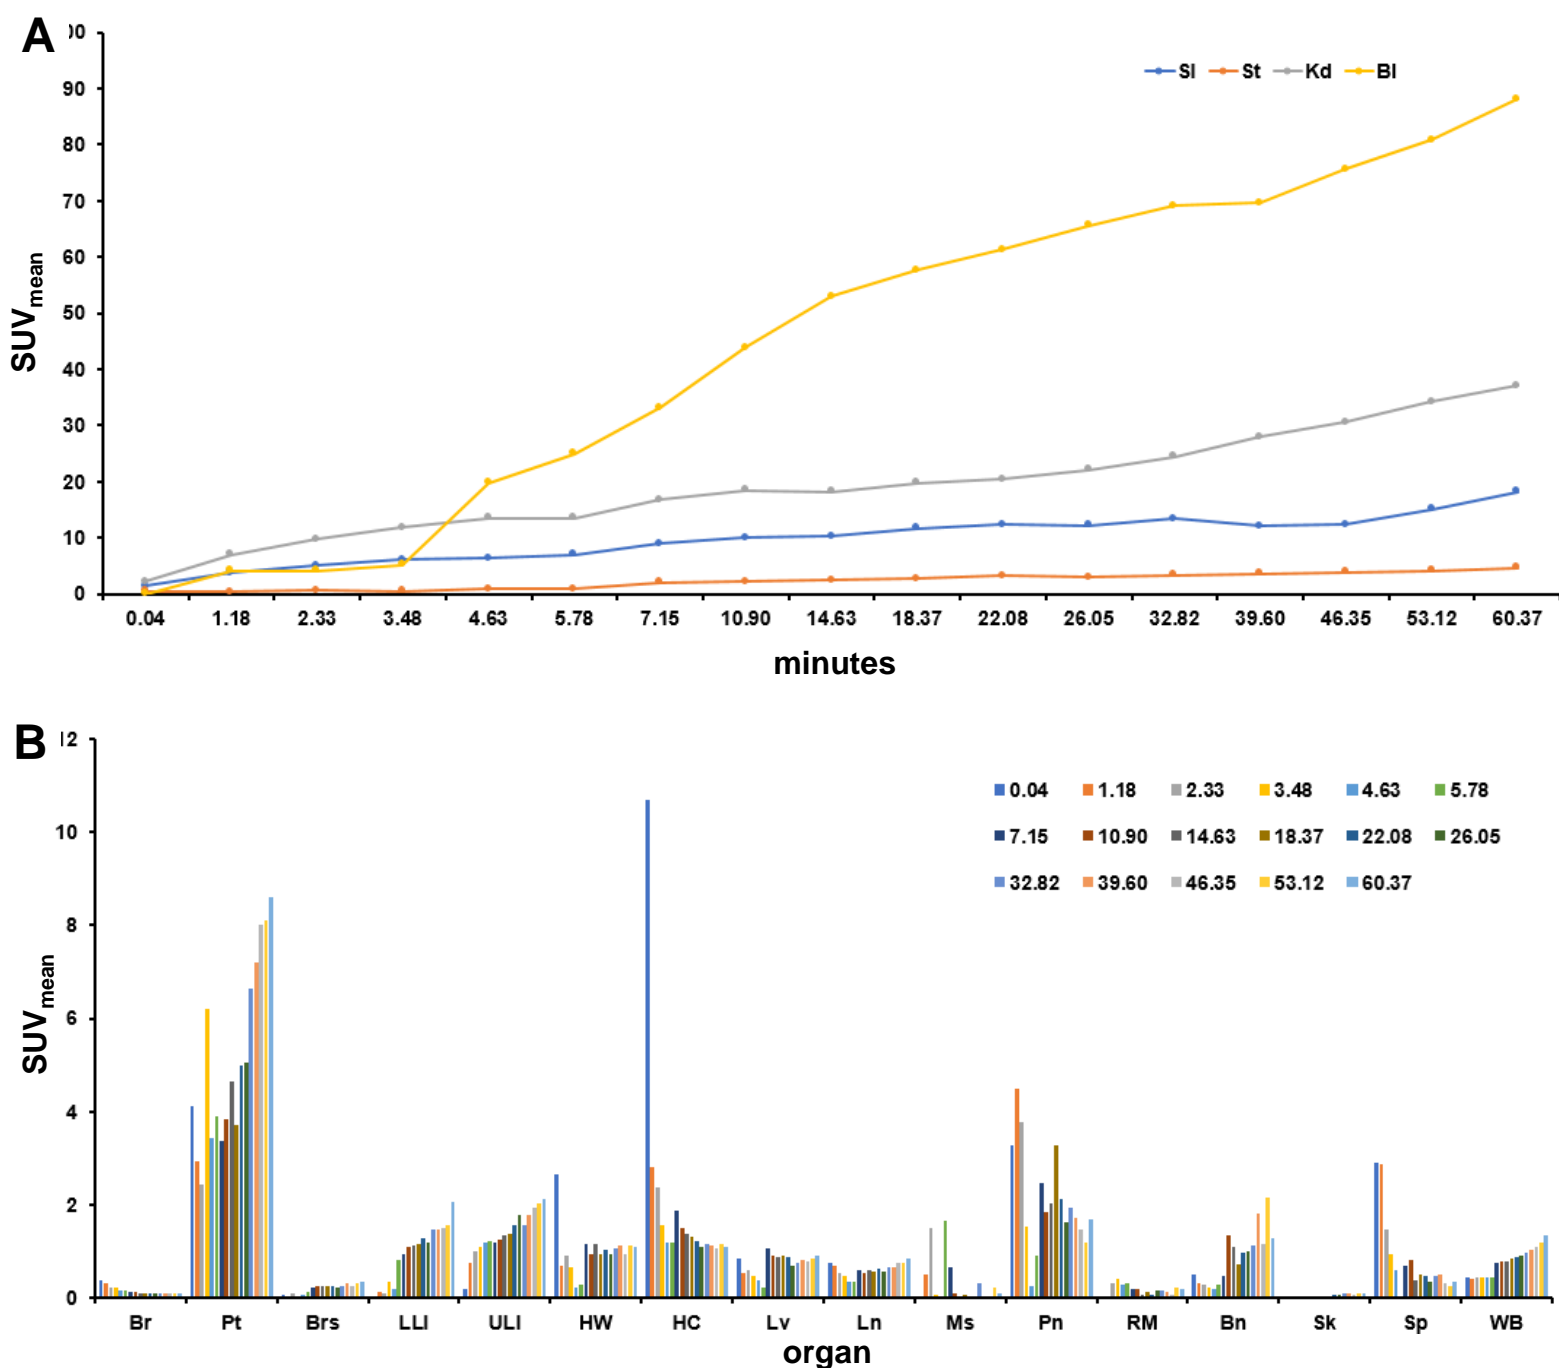

**Supplementary Figure 11. [ $^{68}\text{Ga}$ ]NODA-GA- $\text{R}_0$ 1-MG Dynamic PET Study of Tracer Pharmacokinetics of Patients Imaged at PUMC Hospital, China.** (A) High uptake organs including the small intestines (SI), stomach (St), kidneys (Kd) and bladder (Bl) are quantified by ROI analysis from 0.4 to 60.37 minutes after injection. (B) Relatively lower uptake organs are quantified by ROI analysis at the same timepoints. Organs include the: brain (Br), pituitary gland (Pt), breast (Brs), lower large intestine (LLI), upper large intestine (ULI), heart wall (HW), heart contents (HC), liver (Lv), lung (Ln), muscle (Ms), pancreas (Pn), red marrow (RM), osteogenic cells (Bn), skin (Sk), spleen (Sp), and, whole body (WB). Source Data are provided in a Source Data File.



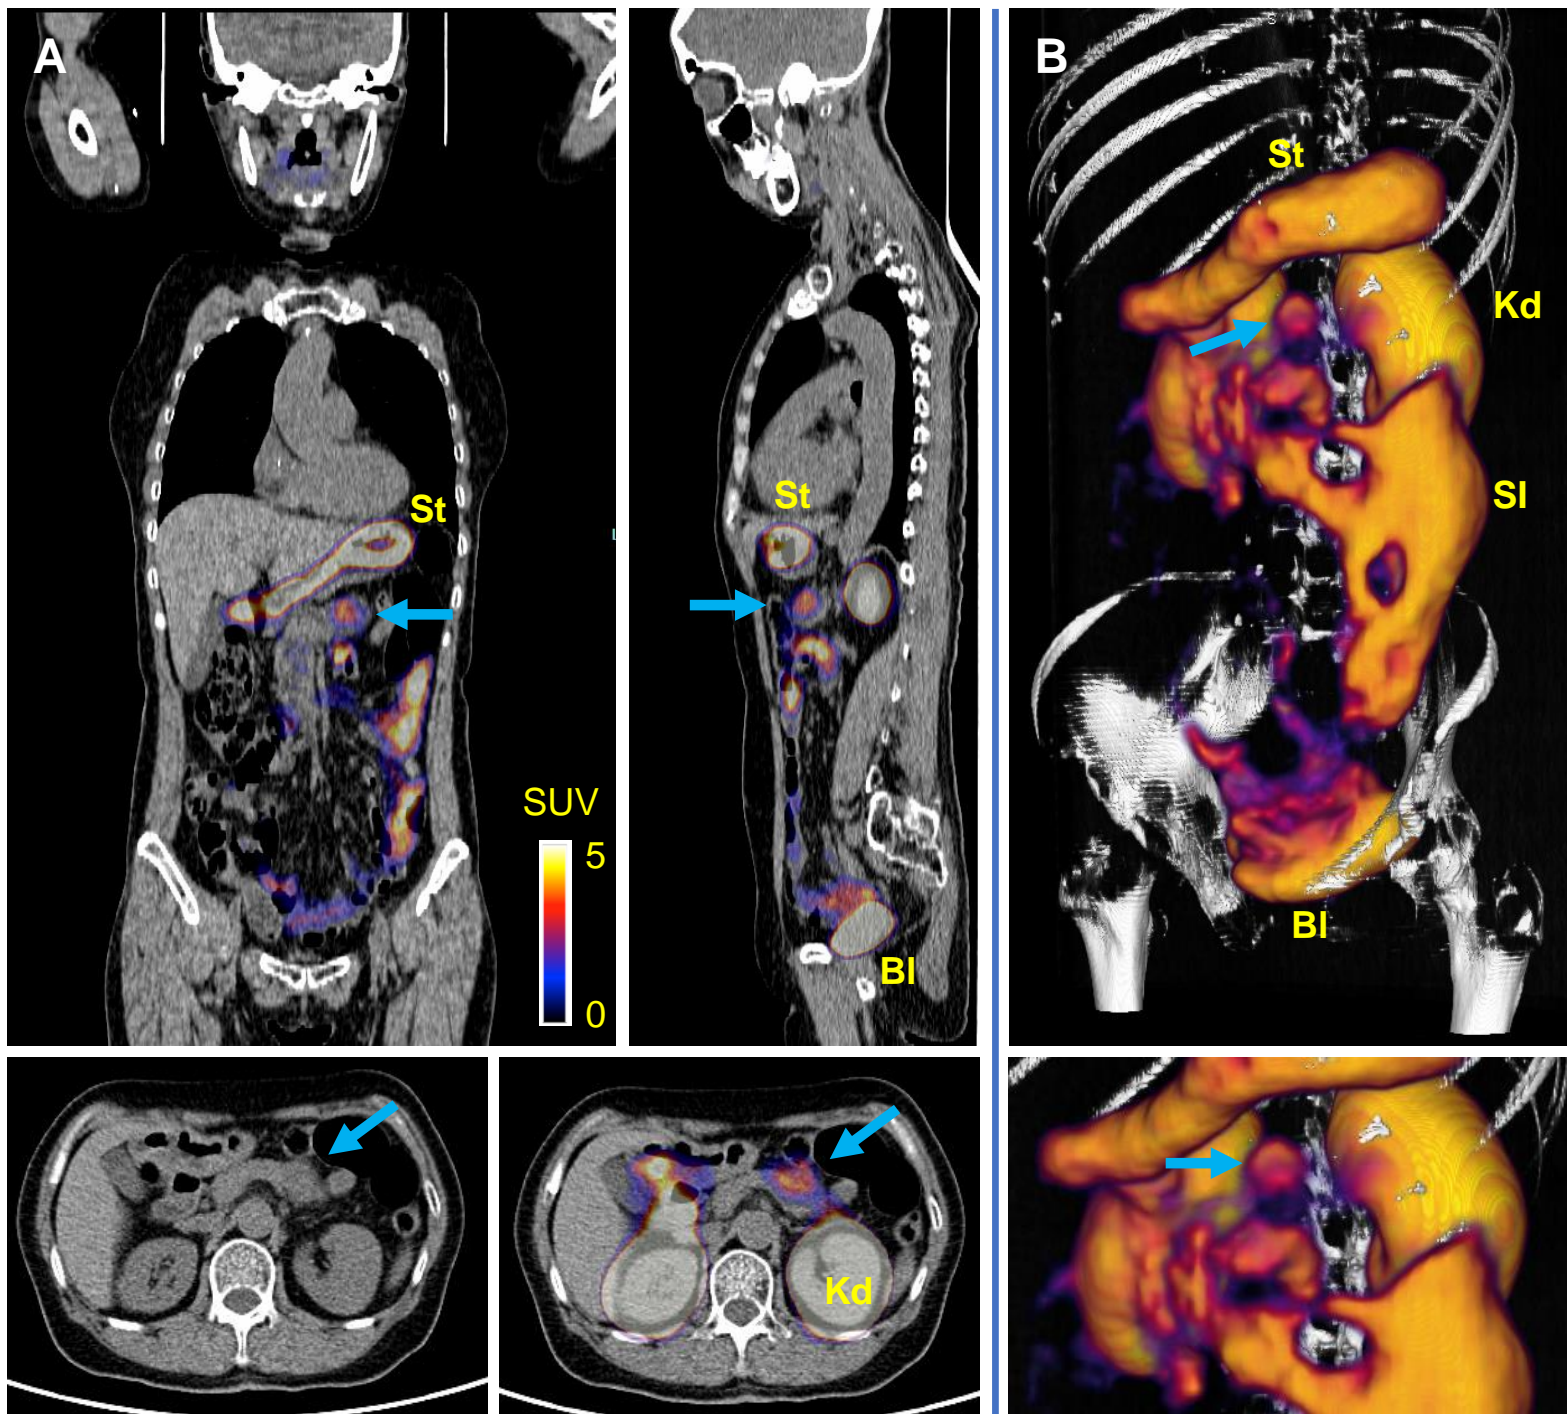

**Supplementary Figure 12. [ $^{68}\text{Ga}$ ]NODA-GA-R<sub>0</sub>1-MG PET/CT Scan, Pancreatic Cancer Patient Imaged at Peking Union Medical College Hospital, China.** (A) PET/CT Images of a 59 year old patient diagnosed with moderately differentiated pancreatic ductal adenocarcinoma. Uptake is observed in the tail of the pancreas ( $\text{SUV}_{\text{mean}} = 4.3$ ) as indicated by the blue arrow. CT image shows enlargement of the tail of the pancreas. (B) Volume rendered PET/CT images show the homogeneous uptake of the tracer in the tumor. Images were acquired ~50 minutes after intravenous injection of 2.2 mCi of [ $^{68}\text{Ga}$ ]NODA-GA-R<sub>0</sub>1-MG. Off-target uptake of the tracer is seen in the kidneys and upper gut. IHC analysis for integrin  $\alpha_v\beta_6$  was inconclusive for this patient and additional studies are underway.

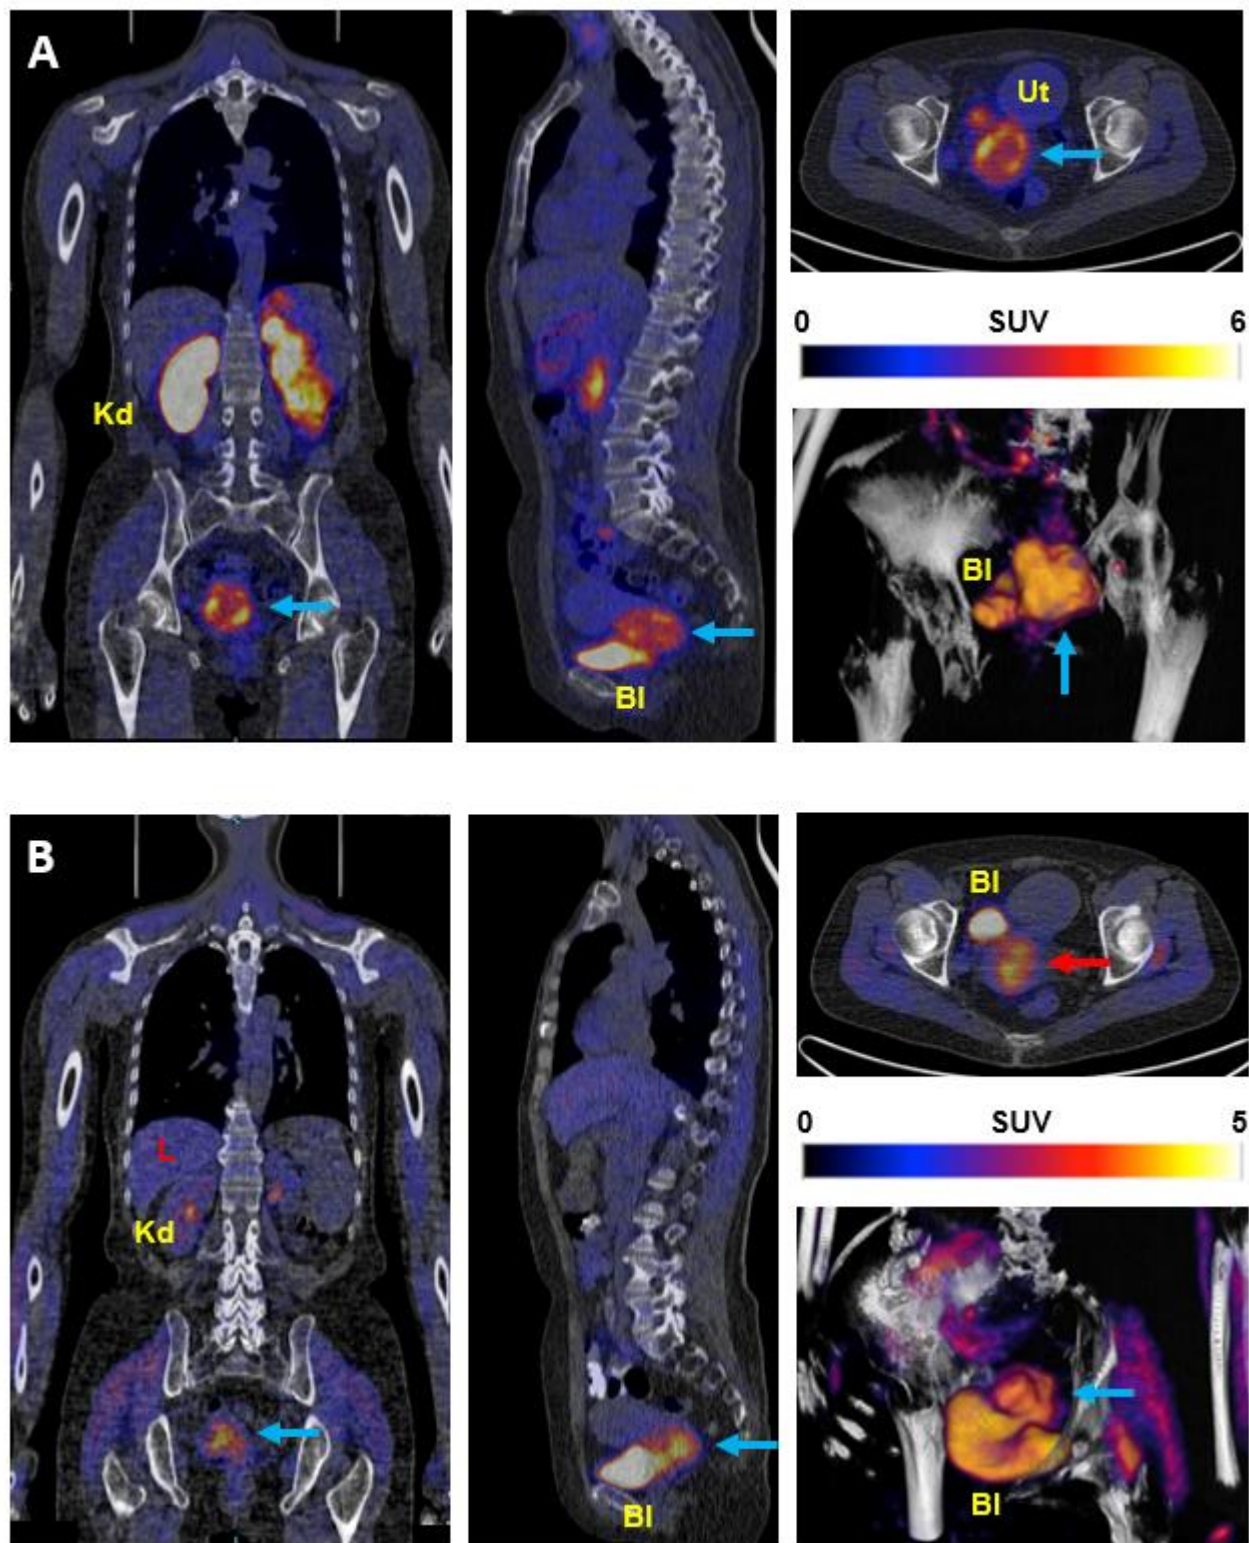

**Supplementary Figure 13.  $[^{68}\text{Ga}]\text{NODA-GA-R}_01\text{-MG}$  PET/CT Scan and  $[^{18}\text{F}]\text{FDG}$  PET/CT Scan, Cervical Cancer Patient Imaged at Peking Union Medical College Hospital, China. (A)** PET/CT Images of a 54 year old patient diagnosed with well differentiated squamous cell carcinoma of the cervix. The bottom-right panel shows volume rendered PET/CT images that demonstrate good tracer uptake in the tumor as indicated by the cyan arrow ( $\text{SUV}_{\text{mean}} = 4.5$ ). Images were acquired ~30 minutes after intravenous injection of 2.1mCi of  $[^{68}\text{Ga}]\text{NODA-GA-R}_01\text{-MG}$ . Off-target uptake of the tracer is seen in the kidneys and upper gut. (B) For comparison,  $[^{18}\text{F}]\text{FDG}$  PET/CT imaging shows tumor uptake of  $\text{SUV}_{\text{mean}} = 4.1$  in the same patient.



A

IPF-4 Left Lung (Transplant) Histogram

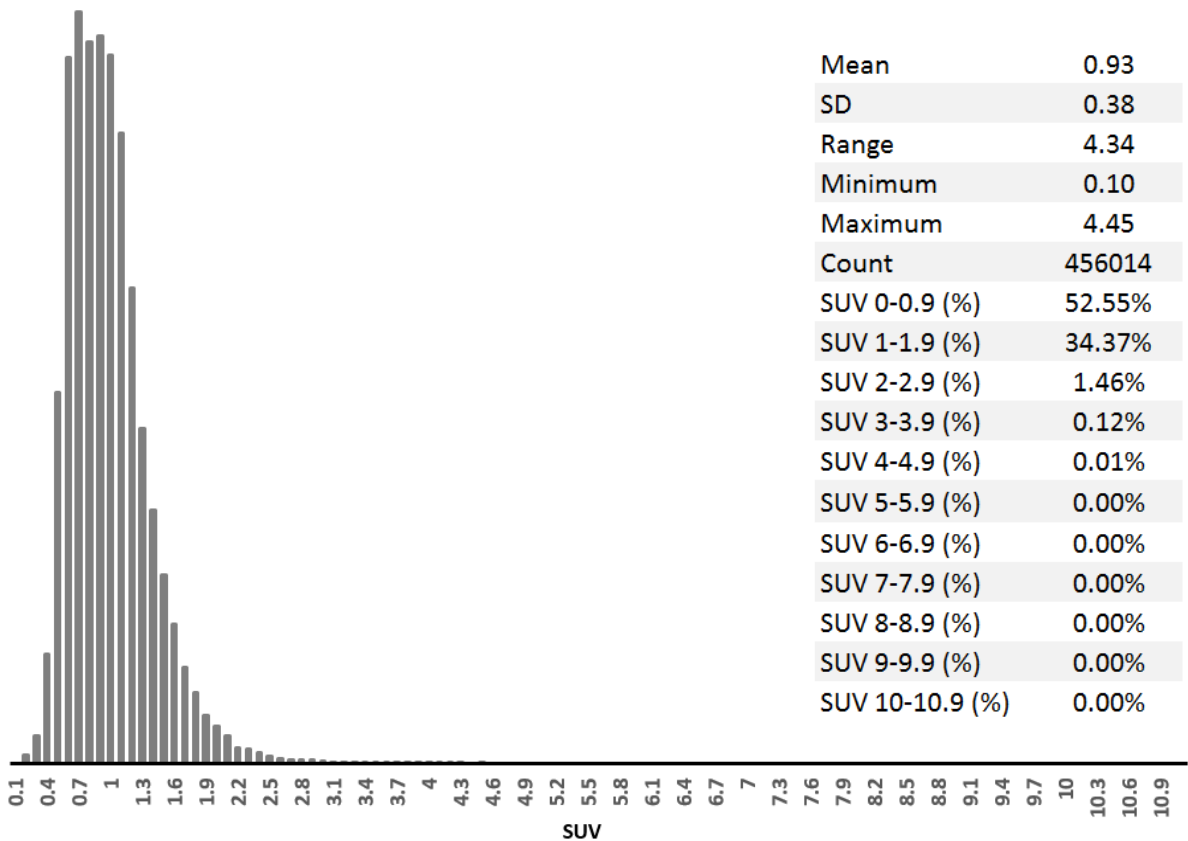

IPF-4 Right Lung Histogram

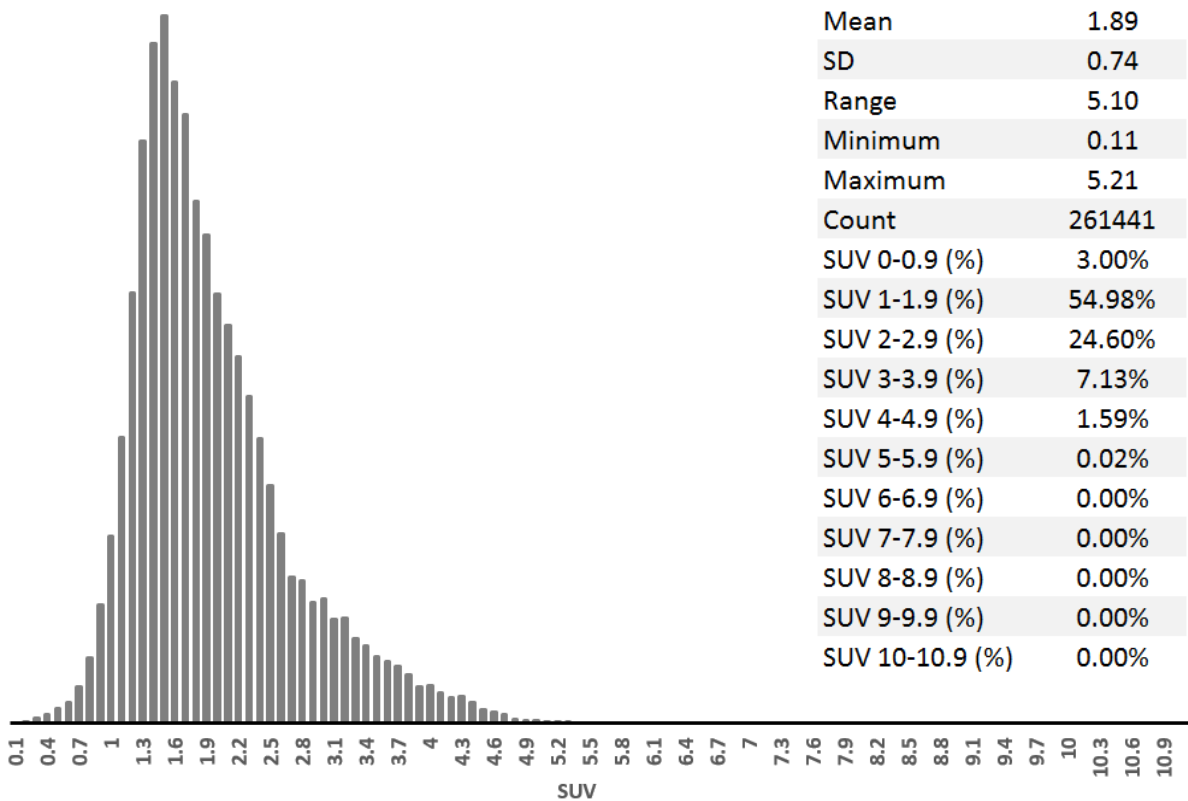

B

IPF-5 Left Lung Histogram

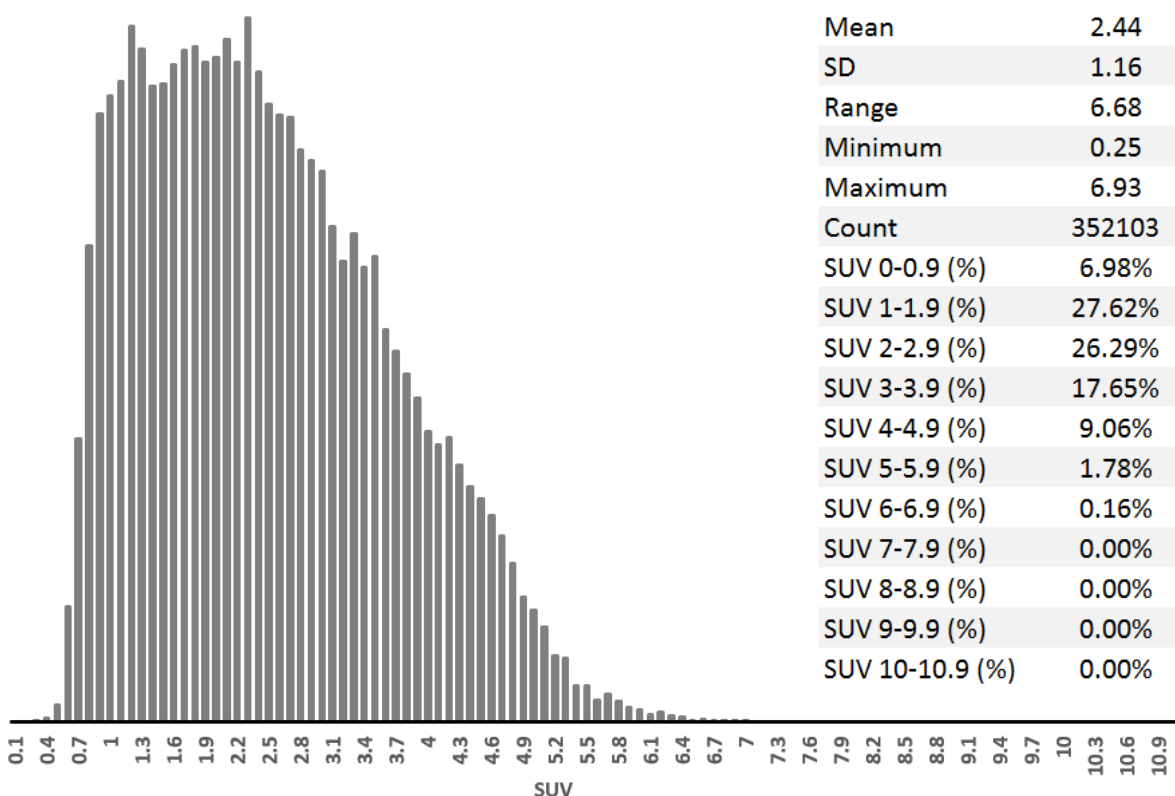

IPF-5 Right Lung Histogram

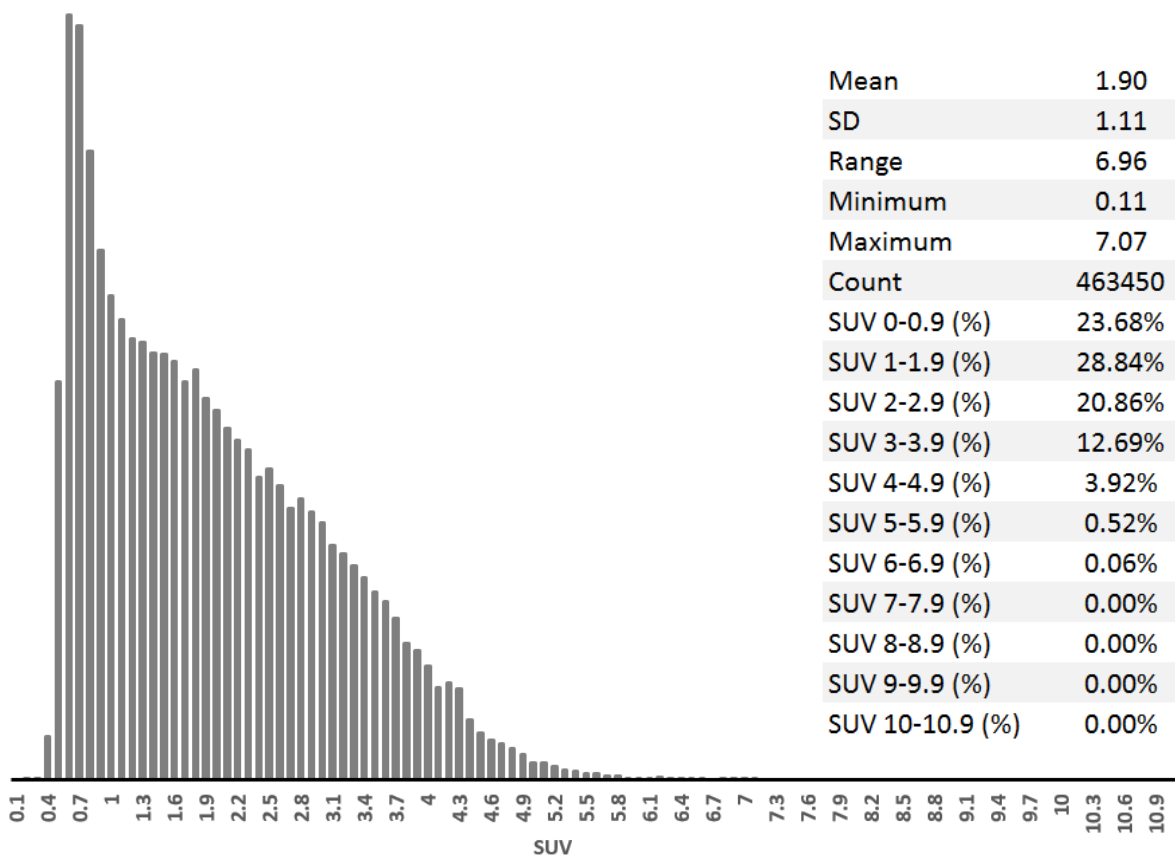

**Supplementary Figure 14. Representative SUV-Histograms of the Lungs of patients IPF-4 (A) and IPF-5 (B).** The charts show the distribution of SUVs at 1 hr after administration of [ $^{18}\text{F}$ ]FP-R<sub>0</sub>1-MG-F2 with the bin size set to increments of 0.1 SUV unit. The summary table includes SUV metrics for the given number of voxels used in the analysis. The initial histogram bins were consolidated into larger bins of ~1 SUV unit and expressed as a percent of the total number of counts recorded in the lung. Source data are provided in a Source Data File.



| Name                                        | Expected Mass<br>(Da) | Observed Mass<br>(Da) |
|---------------------------------------------|-----------------------|-----------------------|
| R <sub>0</sub> 1                            | 3902.8                | 3903                  |
| DOTA-R <sub>0</sub> 1                       | 4289.9                | 4289                  |
| R <sub>0</sub> 1-MR                         | 3929.6                | 3929                  |
| DOTA-R <sub>0</sub> 1-MR                    | 4317.0                | 4318                  |
| R <sub>0</sub> 1-MG                         | 3831.5                | 3830                  |
| DOTA-R <sub>0</sub> 1-MG                    | 4218.9                | 4219                  |
| NODA-GA-R <sub>0</sub> 1-MG                 | 4189.8                | 4189                  |
| [ <sup>19</sup> F]FP-R <sub>0</sub> 1-MG-F1 | 3905.6                | 3906                  |
| [ <sup>19</sup> F]FP-R <sub>0</sub> 1-MG-F2 | 3905.6                | 3906                  |

**Supplementary Table 1. MALDI-MS of Cystine Knot Peptides and their Derivatives.** The expected and observed average [M+H] for the oxidized/folded R<sub>0</sub>1 peptide variants used in this study.

| PET Tracer                                  | Timepoint | Tumor           | Liver           | Kidney            | Muscle          | T:M Ratio       |
|---------------------------------------------|-----------|-----------------|-----------------|-------------------|-----------------|-----------------|
| (Average % Injected Dose / gram $\pm$ S.D.) |           |                 |                 |                   |                 |                 |
| $[^{64}\text{Cu}]$ DOTA-R <sub>0</sub> 1    | 1 hr      | 3.07 $\pm$ 0.17 | 2.26 $\pm$ 0.11 | 30.30 $\pm$ 2.33  | 0.43 $\pm$ 0.01 | 7.09 $\pm$ 0.27 |
|                                             | 2 hr      | 2.91 $\pm$ 0.05 | 2.23 $\pm$ 0.44 | 29.69 $\pm$ 4.31  | 0.41 $\pm$ 0.01 | 7.09 $\pm$ 0.02 |
|                                             | 4 hr      | 2.43 $\pm$ 0.45 | 2.63 $\pm$ 0.74 | 27.70 $\pm$ 3.64  | 0.41 $\pm$ 0.01 | 6.00 $\pm$ 1.03 |
|                                             | 24 hr     | 2.06 $\pm$ 0.40 | 3.30 $\pm$ 0.37 | 12.95 $\pm$ 3.62  | 0.38 $\pm$ 0.01 | 5.48 $\pm$ 0.95 |
| $[^{64}\text{Cu}]$ DOTA-R <sub>0</sub> 1-MR | 1 hr      | 3.45 $\pm$ 0.34 | 4.63 $\pm$ 0.09 | 89.95 $\pm$ 3.64  | 0.54 $\pm$ 0.00 | 6.43 $\pm$ 0.58 |
|                                             | 2 hr      | 3.44 $\pm$ 0.49 | 3.95 $\pm$ 0.28 | 91.62 $\pm$ 2.91  | 0.52 $\pm$ 0.00 | 6.64 $\pm$ 0.90 |
|                                             | 4 hr      | 3.26 $\pm$ 0.65 | 3.99 $\pm$ 0.48 | 89.84 $\pm$ 12.58 | 0.47 $\pm$ 0.00 | 6.93 $\pm$ 1.38 |
|                                             | 24 hr     | 3.44 $\pm$ 0.20 | 7.27 $\pm$ 0.36 | 40.34 $\pm$ 4.13  | 0.52 $\pm$ 0.00 | 6.67 $\pm$ 0.36 |
| $[^{64}\text{Cu}]$ DOTA-R <sub>0</sub> 1-MG | 1 hr      | 2.74 $\pm$ 0.35 | 2.14 $\pm$ 0.38 | 28.35 $\pm$ 2.61  | 0.47 $\pm$ 0.00 | 5.80 $\pm$ 0.72 |
|                                             | 2 hr      | 2.17 $\pm$ 0.35 | 2.27 $\pm$ 0.12 | 29.34 $\pm$ 2.42  | 0.40 $\pm$ 0.00 | 5.43 $\pm$ 0.86 |
|                                             | 4 hr      | 2.11 $\pm$ 0.33 | 2.33 $\pm$ 0.10 | 27.12 $\pm$ 3.87  | 0.35 $\pm$ 0.03 | 6.06 $\pm$ 0.95 |
|                                             | 24 hr     | 2.49 $\pm$ 0.18 | 3.89 $\pm$ 0.50 | 11.83 $\pm$ 1.21  | 0.40 $\pm$ 0.00 | 6.29 $\pm$ 0.43 |

**Supplementary Table 2. Comparative Biodistribution.** One hour to 24 hour biodistribution data of the tumor, kidney, liver and tumor-to-muscle ratios corresponding to the PET images of the 3 PET tracers shown in Figure 4 (above, first column). Source data are provided in a Source Data File.

| Body Component | Integrin $\alpha v \beta 6$ (+)            |                  | Integrin $\alpha v \beta 6$ (-) |                  |
|----------------|--------------------------------------------|------------------|---------------------------------|------------------|
|                | 0.5 hr                                     | 2 hr             | 0.5 hr                          | 2 hr             |
|                | (average % Injected Dose/ gram $\pm$ S.D.) |                  |                                 |                  |
| Tumor          | 3.56 $\pm$ 0.33                            | 3.07 $\pm$ 0.70  | 0.48 $\pm$ 0.02                 | 0.30 $\pm$ 0.11  |
| Blood          | 1.16 $\pm$ 0.15                            | 0.53 $\pm$ 0.20  | 0.89 $\pm$ 0.09                 | 0.33 $\pm$ 0.06  |
| Heart          | 0.94 $\pm$ 0.07                            | 0.67 $\pm$ 0.13  | 0.80 $\pm$ 0.24                 | 0.63 $\pm$ 0.11  |
| Lungs          | 3.47 $\pm$ 0.36                            | 3.28 $\pm$ 0.42  | 3.85 $\pm$ 0.29                 | 3.49 $\pm$ 0.17  |
| Stomach        | 4.42 $\pm$ 0.81                            | 5.23 $\pm$ 1.62  | 4.31 $\pm$ 0.26                 | 5.41 $\pm$ 0.85  |
| Intestine      | 3.28 $\pm$ 0.45                            | 3.95 $\pm$ 1.12  | 3.08 $\pm$ 0.07                 | 3.33 $\pm$ 0.71  |
| Liver          | 0.60 $\pm$ 0.02                            | 0.37 $\pm$ 0.08  | 0.55 $\pm$ 0.10                 | 0.37 $\pm$ 0.06  |
| Pancreas       | 0.66 $\pm$ 0.05                            | 0.44 $\pm$ 0.13  | 0.62 $\pm$ 0.00                 | 0.44 $\pm$ 0.04  |
| Spleen         | 0.63 $\pm$ 0.13                            | 0.34 $\pm$ 0.06  | 0.64 $\pm$ 0.05                 | 0.25 $\pm$ 0.07  |
| Kidney         | 29.19 $\pm$ 4.69                           | 13.12 $\pm$ 2.47 | 43.00 $\pm$ 3.33                | 15.23 $\pm$ 2.72 |
| Brain          | 0.24 $\pm$ 0.11                            | 0.21 $\pm$ 0.03  | 0.18 $\pm$ 0.04                 | 0.20 $\pm$ 0.09  |
| Muscle         | 0.90 $\pm$ 0.06                            | 0.42 $\pm$ 0.19  | 0.73 $\pm$ 0.13                 | 0.51 $\pm$ 0.08  |
| Skin           | 1.69 $\pm$ 0.35                            | 1.57 $\pm$ 0.06  | 1.78 $\pm$ 0.71                 | 1.31 $\pm$ 0.12  |
| Bone           | 0.73 $\pm$ 0.20                            | 0.66 $\pm$ 0.52  | 0.46 $\pm$ 0.02                 | 0.45 $\pm$ 0.29  |
| Tail           | 4.14 $\pm$ 2.06                            | 2.78 $\pm$ 2.05  | 4.45 $\pm$ 1.55                 | 1.93 $\pm$ 1.10  |

**Supplementary Table 3. [ $^{18}\text{F}$ ]FP-R<sub>0</sub>1-MG-F2 Biodistribution.** Biodistribution of [ $^{18}\text{F}$ ]FP-R<sub>0</sub>1-MG-F2 corresponding to mouse models shown in Supplementary Figure 5 (above). Source data are provided in a Source Data File.

| Volunteer No/Sex/Age(y) | Height (m) | Weight (kg) | Inj. Activity (mCi) | Inj. Mass (μg) | Normalized Inj. Mass (μg/kg) |
|-------------------------|------------|-------------|---------------------|----------------|------------------------------|
| 1/M/50                  | 1.79       | 93.0        | 8.12                | 16.3           | 0.18                         |
| 2/F/46                  | 1.65       | 68.0        | 7.34                | 15.7           | 0.23                         |
| 3/M/21                  | 1.87       | 68.9        | 8.12                | 11.1           | 0.16                         |
| 4/F/51                  | 1.57       | 53.1        | 5.25                | 6.5            | 0.09                         |
| 5/M/28                  | 1.80       | 72.1        | 8.58                | 12.8           | 0.24                         |
| Mean                    | 1.74       | 71.0        | 7.48                | 12.5           | 0.18                         |
| Standard Deviation      | 0.12       | 14.3        | 1.32                | 4.0            | 0.06                         |

Healthy Volunteers had a mean age of  $39.2 \pm 12.3$  years old with a range of 21 to 50 years old.

**Supplementary Table 4. Demographics and Injected [<sup>18</sup>F]FP-R<sub>0</sub>1-MG-F2 Dose Data of the Healthy Volunteers Imaged at Stanford University Nuclear Medicine Clinic, USA.** Parameters include sex, age, height of the 5 healthy volunteers. Injected activity was the difference between the activity measured prior to injection and the residual left in the syringe after injection of the tracer. Injected masses were calculated based on the specific activity of the tracer per batch and decay corrected for the time at the end of synthesis.

| 5 Healthy Volunteers<br>Serum Laboratory Value |                                                          | 1 Day After Injection | 2 Days After Injection | 7 Days After Injection |
|------------------------------------------------|----------------------------------------------------------|-----------------------|------------------------|------------------------|
| Hematology                                     |                                                          |                       |                        |                        |
|                                                | White Blood Cell Count (x10 <sup>3</sup> cells/ $\mu$ L) | 6.84 $\pm$ 1.43       | 6.38 $\pm$ 0.99        | 6.36 $\pm$ 1.24        |
|                                                | Red Blood Cell Count (x10 <sup>3</sup> cells/ $\mu$ L)   | 4.87 $\pm$ 0.53       | 4.89 $\pm$ 0.58        | 5.05 $\pm$ 0.50        |
|                                                | Hemoglobin Concentration (g/dL)                          | 14.10 $\pm$ 2.23      | 14.14 $\pm$ 2.35       | 14.64 $\pm$ 2.25       |
|                                                | Hematocrit Concentration (g/dL)                          | 42.66 $\pm$ 6.11      | 43.00 $\pm$ 6.46       | 44.28 $\pm$ 5.92       |
|                                                | Corpuscular Volume (fL)                                  | 87.42 $\pm$ 6.61      | 87.66 $\pm$ 6.69       | 87.42 $\pm$ 6.64       |
|                                                | Corpuscular Hemoglobin Count (pg)                        | 28.82 $\pm$ 2.73      | 28.82 $\pm$ 2.70       | 28.86 $\pm$ 2.76       |
|                                                | Corpuscular Hemoglobin Concentration (g/dL)              | 32.94 $\pm$ 0.95      | 32.88 $\pm$ 0.76       | 32.94 $\pm$ 1.25       |
|                                                | Red Cell Distribution Width (%)                          | 13.90 $\pm$ 2.12      | 13.74 $\pm$ 2.05       | 13.88 $\pm$ 1.77       |
|                                                | Platelet Count (x10 <sup>3</sup> cells/ $\mu$ L)         | 236.20 $\pm$ 40.47    | 220.40 $\pm$ 36.12     | 224.40 $\pm$ 33.44     |
| Chemistry                                      |                                                          |                       |                        |                        |
|                                                | Sodium Concentration (mmol/L)                            | 138.60 $\pm$ 2.97     | 138.20 $\pm$ 2.28      | 138.6 $\pm$ 1.52       |
|                                                | Potassium Concentration (mmol/L)                         | 4.02 $\pm$ 0.32       | 3.98 $\pm$ 0.25        | 4.10 $\pm$ 0.23        |
|                                                | Calcium Concentration (mmol/L)                           | 9.18 $\pm$ 0.44       | 9.06 $\pm$ 0.25        | 9.24 $\pm$ 0.47        |
|                                                | Chloride Concentration (mmol/L)                          | 102.40 $\pm$ 2.19     | 103.20 $\pm$ 1.48      | 101.60 $\pm$ 2.30      |
|                                                | Anion Gap (mEq/L)                                        | 6.40 $\pm$ 0.89       | 6.60 $\pm$ 1.95        | 8.40 $\pm$ 1.67        |
|                                                | CO <sub>2</sub> Level (mmol/L)                           | 29.80 $\pm$ 1.10      | 28.40 $\pm$ 2.19       | 28.60 $\pm$ 2.07       |
|                                                | Urea Nitrogen Level (mg/dL) <sup>2</sup>                 | 15.00 $\pm$ 5.70      | 15.60 $\pm$ 5.13       | 14.00 $\pm$ 3.08       |
|                                                | Creatinine Concentration (mg/dL)                         | 0.93 $\pm$ 0.10       | 0.89 $\pm$ 0.08        | 0.96 $\pm$ 0.16        |
|                                                | Glucose (mg/dL)                                          | 103.80 $\pm$ 14.34    | 102.80 $\pm$ 30.83     | 107.40 $\pm$ 29.67     |

Data are mean value  $\pm$  standard deviations.

**Supplementary Table 5. Clinical Laboratory Testing Results of the 5 healthy volunteers Imaged at Stanford University Nuclear Medicine Clinic, USA.** Results include the complete blood counts (CBC) and basic metabolite panel (BMP) from blood samples obtained 1, 2 and 7 days after injection with [<sup>18</sup>F]FP-R<sub>0</sub>1-MG-F2.



| 5 Healthy Volunteers                       |                                 | Baseline       | 5 minutes     | 10 minutes    | 15 minutes    | 60 minutes     | 120 minutes    | Day 2          | Day 7          |
|--------------------------------------------|---------------------------------|----------------|---------------|---------------|---------------|----------------|----------------|----------------|----------------|
| Vital Signs                                | Heart Rate (bpm)                | 77.60 ± 8.47   | 73.40 ± 6.88  | 73.20 ± 5.36  | 73.00 ± 7.42  | 72.40 ± 5.55   | 70.40 ± 5.94   | 69.40 ± 7.70   | 72.20 ± 8.58   |
|                                            | Oximetry (SO <sub>2</sub> )     | 99.00 ± 1.41   | 99.20 ± 1.79  | 99.40 ± 1.34  | 99.40 ± 1.34  | 99.60 ± 0.89   | 100.00 ± 0.00  | 99.80 ± 0.45   | 98.40 ± 3.58   |
|                                            | Temperature (° F)               | 97.74 ± 1.43   | 97.86 ± 1.63  | 98.24 ± 0.49  | 98.40 ± 0.57  | 97.96 ± 0.47   | 98.20 ± 0.22   | 98.24 ± 0.32   | 98.30 ± 0.49   |
|                                            | Systolic Blood Pressure (mmHg)  | 118.80 ± 12.62 | 118.40 ± 9.07 | 118.40 ± 6.84 | 116.40 ± 6.66 | 118.60 ± 12.10 | 119.20 ± 10.64 | 122.60 ± 11.26 | 116.60 ± 12.10 |
|                                            | Diastolic Blood Pressure (mmHg) | 73.00 ± 9.33   | 73.00 ± 9.80  | 70.20 ± 10.59 | 69.00 ± 10.42 | 70.80 ± 13.68  | 73.40 ± 13.45  | 75.20 ± 10.35  | 71.80 ± 11.56  |
| Data are mean value ± standard deviations. |                                 |                |               |               |               |                |                |                |                |

**Supplementary Table 6. Vital Signs of the 5 Healthy Volunteers Imaged at Stanford University Nuclear Medicine Clinic, USA.** Vital signs recorded before injection of PET tracer, and 5, 10, 15, 60, 120 minutes, 2 days and 7 days after injection with [<sup>18</sup>F]FP-R<sub>0</sub>1-MG-F2.

| Body Component                       | 5 min         | 60 min       | 120 min        |
|--------------------------------------|---------------|--------------|----------------|
| (average SUV <sub>mean</sub> ± S.D.) |               |              |                |
| Brain                                | 0.38 ± 0.21   | 0.17 ± 0.02  | 0.21 ± 0.03    |
| Pituitary Gland                      | * 2.08 ± n.a. | 3.83 ± 0.94  | 3.55 ± 1.45    |
| Heart Wall                           | 1.73 ± 0.80   | 0.71 ± 0.19  | 0.71 ± 0.28    |
| Heart Contents                       | 3.51 ± 1.89   | 0.77 ± 0.19  | ** 0.71 ± 0.15 |
| Lungs                                | 0.96 ± 0.41   | 0.76 ± 0.33  | 0.79 ± 0.36    |
| Stomach                              | 6.33 ± 2.39   | 9.81 ± 1.97  | 8.13 ± 3.78    |
| Small Intestine                      | 7.15 ± 2.81   | 8.51 ± 1.62  | 7.34 ± 1.14    |
| Upper Large Intestine                | 3.18 ± 1.67   | 3.67 ± 1.65  | 2.24 ± 0.64    |
| Lower Large Intestine                | 2.45 ± 0.42   | 2.82 ± 0.93  | 2.13 ± 0.59    |
| Pancreas                             | 2.45 ± 1.58   | 1.89 ± 0.78  | 1.01 ± 0.24    |
| Liver                                | 2.27 ± 0.21   | 0.62 ± 0.17  | 0.42 ± 0.08    |
| Spleen                               | 1.90 ± 1.06   | 0.96 ± 0.42  | 0.88 ± 0.53    |
| Right Kidney                         | 16.35 ± 5.91  | 12.44 ± 4.42 | 8.00 ± 3.32    |
| Urinary Bladder Contents             | 1.07 ± 0.63   | 4.79 ± 2.18  | 3.66 ± 1.72    |
| Muscle-Leg                           | 0.83 ± 0.12   | 1.52 ± 0.35  | 1.50 ± 0.25    |
| Red Marrow                           | 0.46 ± 0.29   | 0.34 ± 0.12  | 0.17 ± 0.13    |
| Osteogenic Cells                     | 0.81 ± 0.44   | 0.44 ± 0.18  | 0.41 ± 0.07    |
| Skin                                 | 0.19 ± 0.21   | 0.18 ± 0.04  | 0.24 ± 0.05    |
| Whole Body to Knees                  | 0.74 ± 0.34   | 0.90 ± 0.46  | 0.81 ± 0.10    |

**Supplementary Table 7. [<sup>18</sup>F]FP-R<sub>0</sub>1-MG-F2 Biodistribution.** The average (5 healthy volunteers) SUV<sub>mean</sub> ± standard deviation (SD, n=5, except for \* where n=1, and \*\* where n=4) of major body organs or tissues. Source data are provided in a Source Data file.

| Timepoint | Whole Blood                     |          | Serum  |          |
|-----------|---------------------------------|----------|--------|----------|
|           | (average normalized CPM ± S.D.) |          |        |          |
| Pre-inj   | 0.05%                           | ± 0.02%  | 0.04%  | ± 0.03%  |
| 1 min     | 40.67%                          | ± 23.80% | 22.69% | ± 12.63% |
| 3 min     | 100.00%                         | (norm)   | 60.92% | 7.65%    |
| * 5 min   | 69.65%                          | ± 18.67% | 44.77% | ± 11.20% |
| * 10 min  | 42.55%                          | ± 12.46% | 28.41% | ± 8.79%  |
| 30 min    | 12.90%                          | ± 2.88%  | 8.74%  | ± 1.82%  |
| 60 min    | 8.62%                           | ± 2.72%  | 5.45%  | ± 2.05%  |
| 90 min    | 7.22%                           | ± 2.08%  | 4.67%  | ± 1.38%  |
| 120 min   | 6.02%                           | ± 1.57%  | 3.57%  | ± 1.06%  |
| 150 min   | 5.79%                           | ± 2.15%  | 3.51%  | ± 1.36%  |
| 180 min   | 5.37%                           | ± 1.98%  | 2.92%  | ± 1.25%  |

**Supplementary Table 8. Kinetics of [ $^{18}\text{F}$ ]FP-R<sub>0</sub>1-MG-F2 in Blood.** Radioactivity in blood was measured as function of time. Plasma was separated from whole blood; both were measured by gamma counting. Decay-corrected counts per minute were normalized to the highest whole blood measurement at the 3-minute time point. Data represent the mean  $\pm$  the SD (n=5, except for \* where n=4). Source data are provided in a Source Data file.

| Target Organ              | mSv/MBq    |              | rem/mCi    |              |
|---------------------------|------------|--------------|------------|--------------|
|                           | Adult Male | Adult Female | Adult Male | Adult Female |
| Adrenals                  | 0.0069     | 0.0088       | 0.0257     | 0.0325       |
| Brain                     | 0.0022     | 0.0025       | 0.0080     | 0.0091       |
| Breasts                   | 0.0029     | 0.0036       | 0.0108     | 0.0134       |
| Gallbladder Wall          | 0.0080     | 0.0095       | 0.0294     | 0.0351       |
| LLI Wall*                 | 0.0071     | 0.0084       | 0.0262     | 0.0309       |
| Small Intestine           | 0.0298     | 0.0358       | 0.1100     | 0.1320       |
| Stomach Wall              | 0.0176     | 0.0207       | 0.0650     | 0.0765       |
| ULI Wall*                 | 0.0095     | 0.0114       | 0.0351     | 0.0421       |
| Heart Wall                | 0.0076     | 0.0092       | 0.0281     | 0.0342       |
| Kidneys                   | 0.0446     | 0.0490       | 0.1650     | 0.1810       |
| Liver                     | 0.0104     | 0.0136       | 0.0387     | 0.0501       |
| Lungs                     | 0.0076     | 0.0098       | 0.0281     | 0.0363       |
| Muscle                    | 0.0090     | 0.0130       | 0.0335     | 0.0481       |
| Ovaries                   | 0.0083     | 0.0101       | 0.0307     | 0.0375       |
| Pancreas                  | 0.0161     | 0.0187       | 0.0597     | 0.0693       |
| Red Marrow                | 0.0050     | 0.0060       | 0.0184     | 0.0223       |
| Osteogenic Cells          | 0.0052     | 0.0066       | 0.0194     | 0.0243       |
| Skin                      | 0.0031     | 0.0038       | 0.0115     | 0.0139       |
| Spleen                    | 0.0065     | 0.0081       | 0.0241     | 0.0299       |
| Testes                    | 0.0042     | n.a.         | 0.0157     | n.a.         |
| Thymus                    | 0.0047     | 0.0058       | 0.0173     | 0.0215       |
| Thyroid                   | 0.0044     | 0.0047       | 0.0163     | 0.0176       |
| Urinary Bladder Wall      | 0.0120     | 0.0151       | 0.0446     | 0.0559       |
| Uterus                    | 0.0081     | 0.0099       | 0.0300     | 0.0367       |
| Total Body                | 0.0071     | 0.0086       | 0.0264     | 0.0317       |
| Effective Dose Equivalent | 0.0115     | 0.0137       | 0.0426     | 0.0506       |
| Effective Dose            | 0.0090     | 0.0109       | 0.0335     | 0.0402       |

\* LLI and ULI = Lower and Upper Large Intestines

**Supplementary Table 9. Dosimetry in 5 Healthy Human Volunteers Imaged at Stanford University Nuclear Medicine Clinic, USA.** Dosimetry values were based on the average percent injected activity (%IA) in the kidney, stomach, small intestine, bladder, pancreas, liver, lung, heart, muscle and whole body remainder. The average area under the curve (AUC) of the %IA was determined by ROI analysis of static [ $^{18}\text{F}$ ]FP-R<sub>0</sub>1-MG-F2 PET scans acquired immediately upon tracer injection, 1 hour and 2 hours after injection. These values were entered into OLINDA (Stabin et al., J. Nucl. Med, 2005) to determine the radiation dosimetry to each of the organs listed in the table. The kidneys were determined to be the dose limiting organ at 0.0490 mSv/MBq or 0.1650 rem/mCi in an adult male. Next, the small intestines of an adult male would receive 0.0298 mSv/MBq or 0.1100 rem/mCi. Using the value for the kidneys of an adult male, the maximum allowable exposure to [ $^{18}\text{F}$ ]FP-R<sub>0</sub>1-MG-F2 may be 30.30 mCi/yr or 1121.21 MBq/yr based on the 5 rem limit stated in the federal guidelines.

| Patient No/Sex/Age(y) | Height (m) | Weight (kg) | Injected Activity (mCi)<br>Knottin/FDG | Injected Mass (μg)<br>Knottin/FDG | Normalized Inj. Mass (μg/kg)<br>Knottin/FDG |
|-----------------------|------------|-------------|----------------------------------------|-----------------------------------|---------------------------------------------|
| 1/F/61                | 1.70       | 102.0       | 5.05/10.2                              | 13.1/<1.3                         | 0.13/<12                                    |

**Supplementary Table 10. Demographics and [<sup>18</sup>F]FP-R<sub>0</sub>1-MG-F2 Dose Data of the Pancreatic Cancer Patient Imaged at Stanford University Nuclear Medicine Clinic, USA.** Parameters include sex, age, height of the study subject. Injected activity is the difference between the activity measured prior to injection and the residual left in the syringe after injection of the tracer. Injected masses are calculated based on the specific activity of the tracer per batch and decay corrected for the time elapsed from the end of synthesis to intravenous injection.



| Patient No/Sex/Age(y) | Cancer     | Weight (kg) | Inj. Activity (mCi) |
|-----------------------|------------|-------------|---------------------|
| 1/F/54                | Cervical   | 60          | 2.1                 |
| 2/F/47                | Cervical   | 63          | 2.1                 |
| 3/F/69                | Cervical   | 60          | 3.1                 |
| 4/M/66                | Pancreatic | 65          | 1.5                 |
| 5/F/59                | Pancreatic | 50          | 2.2                 |
| 6/M/70                | Lung       | 60          | 2.6                 |
| Mean                  |            | 59.7        | 2.3                 |
| Standard Deviation    |            | 5.2         | 0.5                 |

Study participants had a mean age of  $60.8 \pm 8.4$  years old with a range of 47 to 70 years old.

**Supplementary Table 11. Demographics and [ $^{68}\text{Ga}$ ]NODA-GA-R<sub>0</sub>1-MG Dosage Information of Cancer Patients Imaged at Peking Union Medical College Hospital, China.** Parameters include sex, age, height of 6 cancer patients. Injected activity was the total amount of radioactivity injected into the study subject.

| Target Organ              | mSv/MBq                  |        |        |        |
|---------------------------|--------------------------|--------|--------|--------|
|                           | Bladder Voiding Interval |        |        |        |
|                           | n.a.                     | 0.5 hr | 1 hr   | 2 hr   |
| Adrenals                  | 0.0031                   | 0.0031 | 0.0031 | 0.0031 |
| Brain                     | 0.0003                   | 0.0003 | 0.0003 | 0.0003 |
| Breasts                   | 0.0006                   | 0.0006 | 0.0006 | 0.0006 |
| Gallbladder Wall          | 0.0034                   | 0.0034 | 0.0034 | 0.0034 |
| LLI Wall                  | 0.0032                   | 0.0027 | 0.0029 | 0.0032 |
| Small Intestine           | 0.0680                   | 0.0678 | 0.0679 | 0.0680 |
| Stomach Wall              | 0.0088                   | 0.0087 | 0.0087 | 0.0088 |
| ULI Wall                  | 0.0056                   | 0.0054 | 0.0055 | 0.0056 |
| Heart Wall                | 0.0010                   | 0.0010 | 0.0010 | 0.0010 |
| Kidneys                   | 0.1810                   | 0.1810 | 0.1810 | 0.1810 |
| Liver                     | 0.0068                   | 0.0068 | 0.0068 | 0.0068 |
| Lungs                     | 0.0047                   | 0.0047 | 0.0047 | 0.0047 |
| Muscle                    | 0.0020                   | 0.0019 | 0.0020 | 0.0020 |
| Ovaries                   | 0.0041                   | 0.0036 | 0.0038 | 0.0041 |
| Pancreas                  | 0.0028                   | 0.0028 | 0.0028 | 0.0028 |
| Red Marrow                | 0.0017                   | 0.0016 | 0.0016 | 0.0017 |
| Osteogenic Cells          | 0.0011                   | 0.0011 | 0.0011 | 0.0011 |
| Skin                      | 0.0007                   | 0.0007 | 0.0007 | 0.0007 |
| Spleen                    | 0.0029                   | 0.0029 | 0.0029 | 0.0029 |
| Testes                    | 0.0011                   | 0.0007 | 0.0008 | 0.0011 |
| Thymus                    | 0.0006                   | 0.0006 | 0.0006 | 0.0006 |
| Thyroid                   | 0.0005                   | 0.0005 | 0.0005 | 0.0005 |
| Urinary Bladder Wall      | 0.0657                   | 0.0191 | 0.0362 | 0.0654 |
| Uterus                    | 0.0047                   | 0.0035 | 0.0039 | 0.0047 |
| Total Body                | 0.0032                   | 0.0031 | 0.0032 | 0.0032 |
| Effective Dose Equivalent | 0.0217                   | 0.0188 | 0.0199 | 0.0217 |
| Effective Dose            | 0.0115                   | 0.0090 | 0.0099 | 0.0115 |

\* LLI and ULI = Lower and Upper Large Intestines

| Target Organ              | rem/mCi                  |        |        |        |
|---------------------------|--------------------------|--------|--------|--------|
|                           | Bladder Voiding Interval |        |        |        |
|                           | n.a.                     | 0.5 hr | 1 hr   | 2 hr   |
| Adrenals                  | 0.0116                   | 0.0115 | 0.0115 | 0.0116 |
| Brain                     | 0.0012                   | 0.0012 | 0.0012 | 0.0012 |
| Breasts                   | 0.0021                   | 0.0021 | 0.0021 | 0.0021 |
| Gallbladder Wall          | 0.0126                   | 0.0125 | 0.0125 | 0.0126 |
| LLI Wall                  | 0.0118                   | 0.0099 | 0.0106 | 0.0118 |
| Small Intestine           | 0.2520                   | 0.2510 | 0.2510 | 0.2520 |
| Stomach Wall              | 0.0324                   | 0.0323 | 0.0323 | 0.0324 |
| ULI Wall                  | 0.0206                   | 0.0200 | 0.0202 | 0.0206 |
| Heart Wall                | 0.0037                   | 0.0037 | 0.0037 | 0.0037 |
| Kidneys                   | 0.6690                   | 0.6690 | 0.6690 | 0.6690 |
| Liver                     | 0.0252                   | 0.0251 | 0.0252 | 0.0252 |
| Lungs                     | 0.0175                   | 0.0175 | 0.0175 | 0.0175 |
| Muscle                    | 0.0075                   | 0.0070 | 0.0072 | 0.0075 |
| Ovaries                   | 0.0152                   | 0.0134 | 0.0141 | 0.0152 |
| Pancreas                  | 0.0104                   | 0.0104 | 0.0104 | 0.0104 |
| Red Marrow                | 0.0062                   | 0.0059 | 0.0060 | 0.0062 |
| Osteogenic Cells          | 0.0042                   | 0.0041 | 0.0041 | 0.0042 |
| Skin                      | 0.0026                   | 0.0024 | 0.0025 | 0.0026 |
| Spleen                    | 0.0108                   | 0.0107 | 0.0107 | 0.0108 |
| Testes                    | 0.0039                   | 0.0026 | 0.0031 | 0.0039 |
| Thymus                    | 0.0024                   | 0.0024 | 0.0024 | 0.0024 |
| Thyroid                   | 0.0019                   | 0.0018 | 0.0019 | 0.0019 |
| Urinary Bladder Wall      | 0.2430                   | 0.0706 | 0.1340 | 0.2420 |
| Uterus                    | 0.0172                   | 0.0130 | 0.0145 | 0.0172 |
| Total Body                | 0.0120                   | 0.0115 | 0.0117 | 0.0120 |
| Effective Dose Equivalent | 0.0804                   | 0.0695 | 0.0735 | 0.0803 |
| Effective Dose            | 0.0424                   | 0.0331 | 0.0365 | 0.0424 |

\* LLI and ULI = Lower and Upper Large Intestines

**Supplementary Table 12. Dosimetry based on a dynamic PET scan of a Cervical Cancer Patient.** The average area under the curve of the percent injected activity was determined by ROI analysis of a [<sup>68</sup>Ga]NODA-GA-R<sub>0</sub>1-MG dynamic PET scan (Supplementary Figure 10). AUCs included the kidney, stomach, small intestine, bladder, pancreas, liver, lung, heart, muscle and whole body remainder. These values were entered into OLINDA to determine the radiation dosimetry to each of the organs listed in the table. Several bladder voiding intervals were explored. The dose limiting organ would be the kidney subject to exposure levels of 0.1810 mSv/MBq or 0.6690 rem/mCi and 0.181 rem/mCi. Next, the small intestines would receive 0.0680 mSv/MBq or 0.2520 rem/mCi. Using these values, the maximum allowable exposure to [<sup>68</sup>Ga]NODA-GA-R<sub>0</sub>1-MG is calculated to be 7.5 mCi/yr or 276.5 MBq/yr based on the federal guideline of 5 rem per year maximum allowable exposure.
